# Supplementary material for: Toward Fast and Efficient Visible‐Light‐Driven Molecular Motors: A Minimal Design
Source: PubMed Central journal article supplement — ChemistryOpen. 2018 Aug 2;7(8):583–9. doi: 10.1002/open.201800089 (PMC6070775; doi:10.1002/open.201800089), 2018-08-02
Supplement: OPEN-7-583-s001.pdf [file OPEN-7-583-s001.pdf]

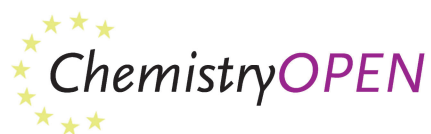

## Supporting Information

© 2018 The Authors. Published by Wiley-VCH Verlag GmbH & Co. KGaA, Weinheim

### **Toward Fast and Efficient Visible-Light-Driven Molecular Motors: A Minimal Design**

Jun Wang and Bo Durbeej<sup>\*[a]</sup>

[open\\_201800089\\_sm\\_miscellaneous\\_information.pdf](#)

[open\\_201800089\\_sm\\_Movie\\_4d-e-in-z-out.mov](#)

[open\\_201800089\\_sm\\_Movie\\_4d-e-out-z-in.mov](#)

## Supporting Information: Contents

|                                                               |                |
|---------------------------------------------------------------|----------------|
| Computational details                                         | pages S2–S5    |
| Retrosynthetic analysis and Scheme S1                         | page S6        |
| Figure S1                                                     | page S7        |
| Figure S2                                                     | page S8        |
| Figure S3                                                     | page S9        |
| Figure S4                                                     | page S10       |
| Figure S5                                                     | page S11       |
| Figure S6                                                     | page S12       |
| Table S1                                                      | page S13       |
| Table S2                                                      | page S14       |
| Table S3                                                      | page S15       |
| Table S4                                                      | page S16       |
| Table S5                                                      | page S17       |
| Description of multimedia files                               | page S18       |
| References for the Supporting Information                     | pages S19–S20  |
| Cartesian coordinates for CASSCF $S_0$ equilibrium geometries | pages S21–S84  |
| Cartesian coordinates for MP2 $S_0$ equilibrium geometries    | pages S85–S148 |

## Computational details

**Light-absorption features.** The light absorption of motors **1a–4d** was investigated in the following way, using Dunning’s correlation-consistent polarized valence triple- $\zeta$  (cc-pVTZ) basis set<sup>[1]</sup> for all steps and considering each of the  $E_{\text{out}}$ ,  $Z_{\text{in}}$ ,  $E_{\text{in}}$  and  $Z_{\text{out}}$  isomers (although being enantiomers, the results for  $E_{\text{out}}$  and  $E_{\text{in}}$  are identical, as are the results for  $Z_{\text{out}}$  and  $Z_{\text{in}}$ ). First, the ground-state ( $S_0$ ) equilibrium geometries of the motors were optimized with the complete active space self-consistent field (CASSCF) method.<sup>[2]</sup> Based on the resulting geometries, the same method was then used to calculate the wave function at the vertical Franck-Condon (FC) point in the bright and photoactive first excited singlet  $\pi\pi^*$  state ( $S_1$ ) of each species. Finally, from these wave functions, single-point calculations were performed with complete active space second-order perturbation theory (CASPT2)<sup>[3]</sup> to obtain vertical  $S_0 \rightarrow S_1$  excitation energies. The corresponding oscillator strengths were obtained with the complete active space state-interaction (CASSI) method.<sup>[4]</sup> All CASSCF and CASPT2 calculations were carried out with active spaces comprising the full  $\pi$ -systems of the motors, i.e., utilizing CAS(6,6), CAS(8,8) and CAS(10,10) for **1a–1d**, **2a–2d/3a–3d** and **4a–4d**, respectively. As a complement to the CASPT2//CASSCF results, vertical excitation energies (both  $S_0 \rightarrow S_1$  and  $S_0 \rightarrow S_2$ ) were also calculated using the approximate coupled-cluster singles and doubles (CC2) method<sup>[5]</sup> within the resolution-of-the-identity (RI) approximation.<sup>[6,7]</sup> These calculations were based on  $S_0$  equilibrium geometries optimized with Møller-Plesset second-order perturbation theory (MP2).

**Enantiomerization barriers.** The  $E_{\text{out}} \leftrightarrow E_{\text{in}}$  and  $Z_{\text{out}} \leftrightarrow Z_{\text{in}}$  enantiomerization free-energy barriers of motors **1a–4d** were calculated in the gas phase and in non-polar (cyclohexane) and polar (water) solvents using both MP2 and density functional theory (DFT) methods in

combination with the cc-pVTZ basis set. The solvents were described with the SMD continuum solvation model<sup>[8]</sup> and the DFT calculations were carried out with the B3LYP and M06-2X<sup>[9]</sup> global and the  $\omega$ B97X-D<sup>[10]</sup> range-separated hybrid functionals. Following  $S_0$  equilibrium geometry optimization of the four motor isomers and the enantiomerization transition structures that connect them, frequency calculations were performed to obtain Gibbs free energies (at room temperature) of the resulting geometries and to ensure that these do correspond to minima (real vibrational frequencies only) or transition structures (one imaginary vibrational frequency). Throughout, the MP2/B3LYP/M06-2X/ $\omega$ B97X-D geometries were subjected to MP2/B3LYP/M06-2X/ $\omega$ B97X-D frequency calculations, respectively. Thereby, the enantiomerization free-energy barriers predicted by any of the methods stem exclusively from calculations with that very method.

**MEP calculations.** The photoisomerization minimum energy path (MEP) calculations on motors **1d/2d/3d/4d** were started from the  $S_1$  FC points at the CASSCF  $S_0$  equilibrium geometries of the  $E_{out}$ ,  $Z_{in}$ ,  $E_{in}$  and  $Z_{out}$  isomers, and were performed using state-averaged CASSCF (SA-CASSCF) in combination with Dunning's correlation-consistent polarized valence double- $\zeta$  (cc-pVDZ) basis set.<sup>[11]</sup> Employing equal (0.5) weights for  $S_0$  and  $S_1$  in the state-averaging, the MEP calculations were done with the same active spaces as the light-absorption calculations (i.e., with CAS(6,6), CAS(8,8) and CAS(10,10) for **1d**, **2d/3d** and **4d**, respectively). For **4d** (MEPs in Figure 3), the  $S_0$  and  $S_1$  energies of the  $S_1$  MEP geometries were refined through CASPT2 single-point calculations with the cc-pVDZ basis set, so as to account for dynamic electron correlation effects. For **1d/2d/3d** (MEPs in Figures S3–S5), on the other hand, no such refinement was deemed necessary, based on

a comparison in Figure S6 of the MEPs of **4d** obtained with and without CASPT2 single-point calculations. Indeed, as can be seen from Figure S6, the two sets of MEPs are very similarly shaped.

**NAMD simulations.** The non-adiabatic molecular dynamics (NAMD) simulations of the photoisomerizations of motor **4d** were carried out using SA-CASSCF(10,10), with equal weights for  $S_0$  and  $S_1$ , in combination with Ahlrich’s split valence plus polarization double- $\zeta$  (SVP) basis set.<sup>[11]</sup> First, for each of the  $E_{out}$ ,  $Z_{in}$ ,  $E_{in}$  and  $Z_{out}$  isomers, 10 different initial nuclear configurations and velocities were generated from a harmonic-oscillator Wigner distribution<sup>[12,13]</sup> of the corresponding  $S_0$  vibrational normal modes calculated at the MP2/SVP level of theory. For each isomer, these initial conditions were then used to start 10 photoisomerization trajectories from the  $S_1$  FC points. Evaluating nuclear forces “on the fly”, the trajectories were propagated classically for a maximum of 700 fs employing the velocity Verlet algorithm<sup>[14]</sup> with a fixed integration time step of 1 fs.

During the simulations, the non-adiabatic coupling  $\langle \Psi_1 | \frac{\partial}{\partial \mathbf{R}} \Psi_0 \rangle$  between the  $S_1$  and  $S_0$  states was evaluated in the framework of Landau-Zener theory,<sup>[15,16]</sup> using the algorithm by Robb and co-workers<sup>[17,18]</sup> as implemented in the MOLCAS 8.0 suite of programs.<sup>[19]</sup> In this framework/algorithm, the coupling is large when  $\langle \Psi_1 | \frac{\partial}{\partial t} \Psi_0 \rangle$  is large, as calculated using the numerical approximation

$$\langle \Psi_1(t) | \frac{\partial}{\partial t} \Psi_0(t) \rangle \approx \frac{\langle \Psi_1(t) | \Psi_0(t + \Delta t) \rangle}{\Delta t}.$$

Performing this calculation at each step along the trajectories for which the energy gap between the two states is smaller than 0.03 a.u., a trajectory was allowed to hop from the  $S_1$  state to the  $S_0$  state subject to the condition that  $\langle \Psi_1(t) | \Psi_0(t + \Delta t) \rangle$  exceeds a default value (0.25) signaling the

proximity of a  $S_1/S_0$  conical intersection region (by virtue of the associated deviation of the  $S_1$  and  $S_0$  wave functions from orthogonality). Qualitatively, the procedure to only allow a single hop between the two states (from  $S_1$  to  $S_0$ ) has been validated in previous NAMD simulations of motor **1a**, which showed that increasing the number of allowed hops does not affect the predictions of key quantities like photoisomerization times and quantum yields by more than 10%.<sup>[20]</sup>

**Software used.** The MP2 and DFT calculations were done with Gaussian 09.<sup>[21]</sup> The CC2 calculations were done with TURBOMOLE 6.6.<sup>[22,23]</sup> All other calculations were done with MOLCAS 8.0.<sup>[19]</sup>

## Retrosynthetic analysis and Scheme S1

As shown by Lumento et al.<sup>[24]</sup> who built on earlier work by Gawley and Chemburkar,<sup>[25]</sup> photoisomerizable Schiff-base systems can be synthesized through nitrilium ion cyclization onto an indanylidene moiety. Thus, using a nitrilium ion that upon cyclization yields a dihydropyridinium motif and replacing indanylidene with a tetrabrominated cyclohexenylidene, a retrosynthetic analysis for the preparation of motor **4d** can be summarized as in Scheme S1.

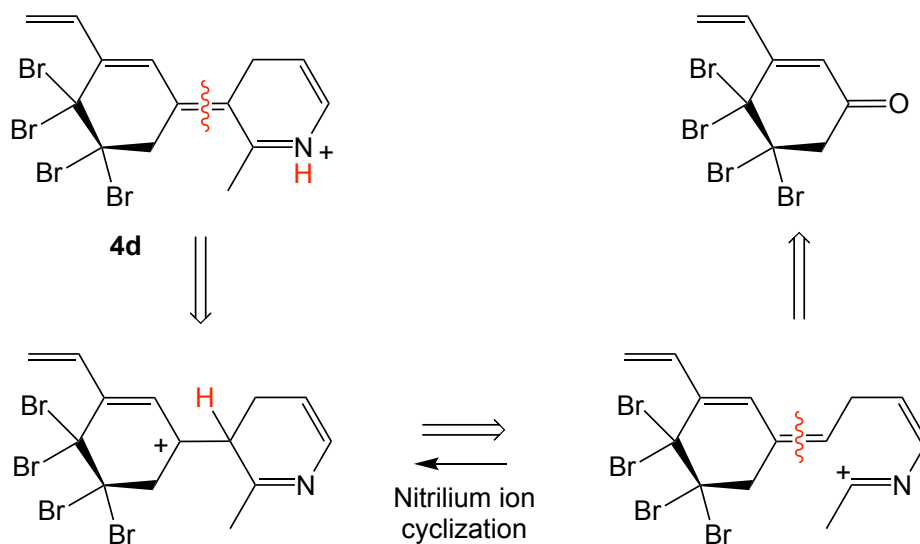

**Scheme S1.** Retrosynthetic analysis for the preparation of motor **4d**.

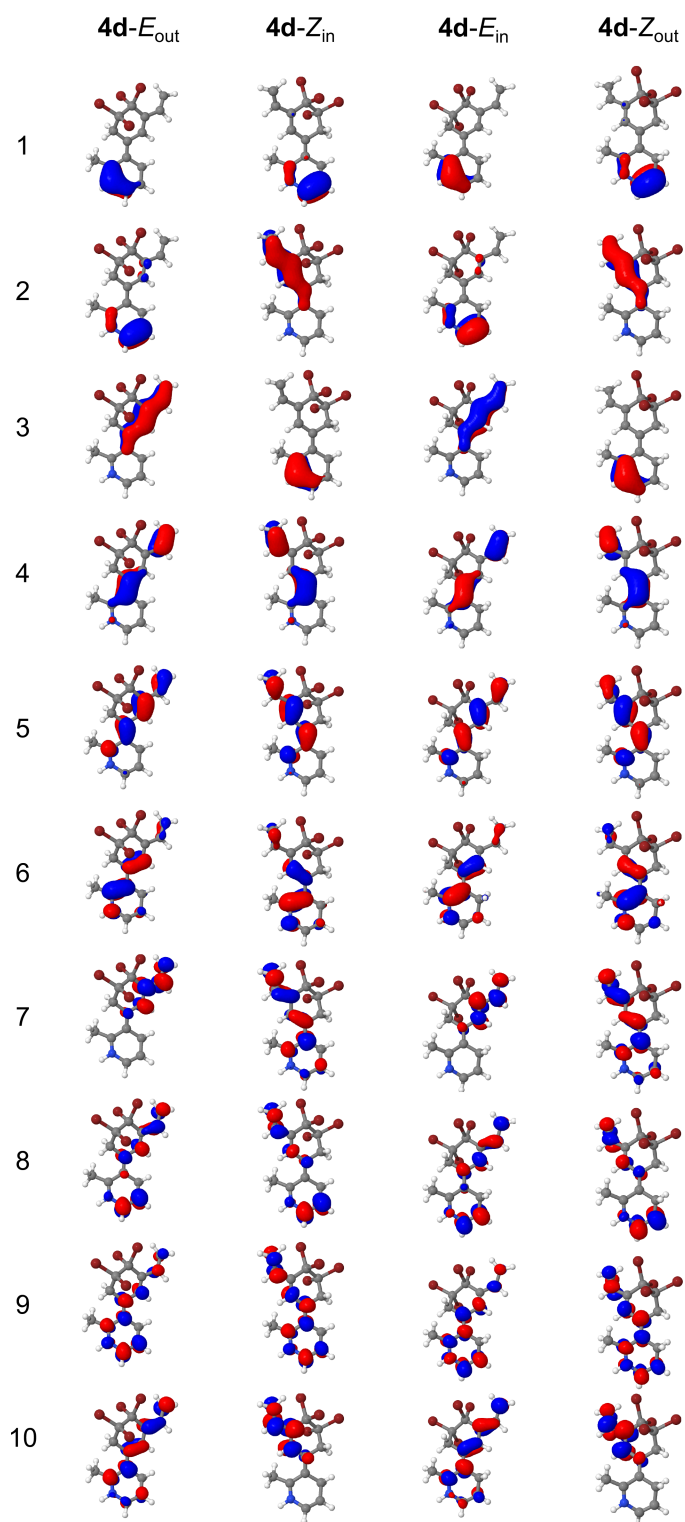

**Figure S1.** Active CASSCF molecular orbitals 1–10 at the CASSCF  $S_0$  equilibrium geometries of the  $E_{out}$ ,  $Z_{in}$ ,  $E_{in}$  and  $Z_{out}$  isomers of motor **4d**.



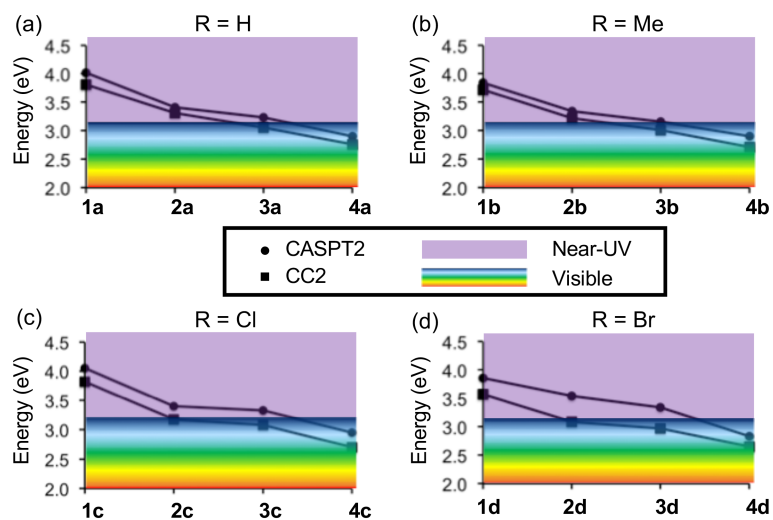

**Figure S2.** Vertical  $S_0 \rightarrow S_1$  excitation energies of the  $Z_{out}$  and  $Z_{in}$  isomers of motors (a) **1a–4a**, (b) **1b–4b**, (c) **1c–4c** and (d) **1d–4d** in the near-UV (<400 nm, >3.1 eV) or visible (>400 nm, <3.1 eV) regime calculated with CASPT2 and CC2.

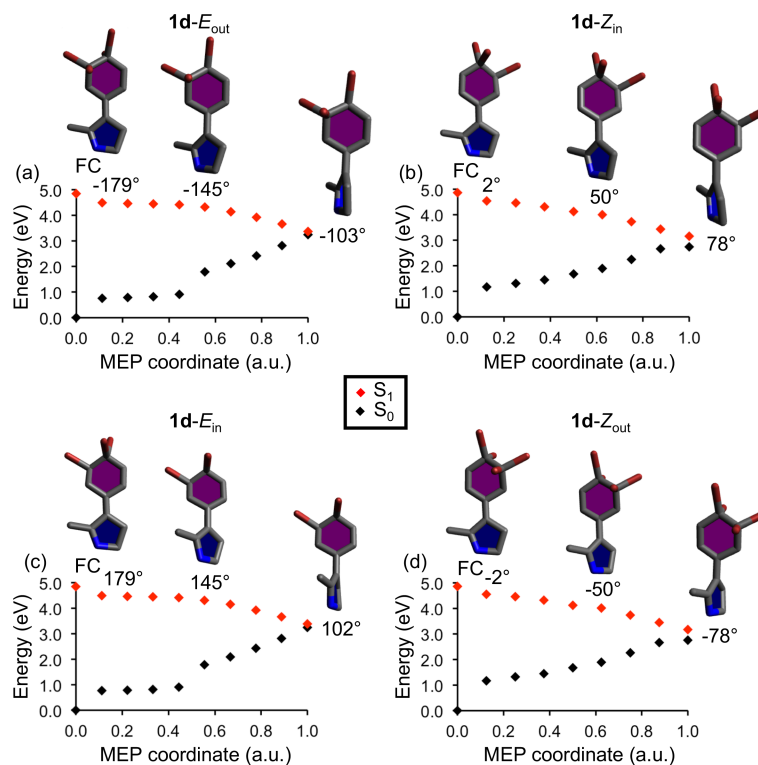

**Figure S3.** SA-CASSCF photoisomerization MEPs from the  $S_1$  FC points of the (a)  $E_{out}$ , (b)  $Z_{in}$ , (c)  $E_{in}$  and (d)  $Z_{out}$  isomers of motor **1d**. Shown are also molecular geometries along the respective path and the corresponding  $\omega$  dihedral angles.

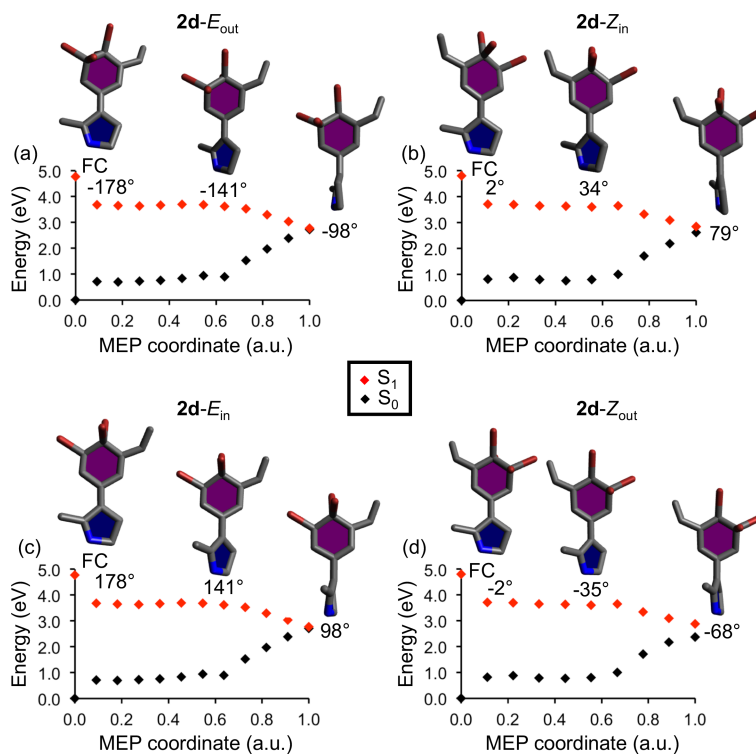

**Figure S4.** SA-CASSCF photoisomerization MEPs from the  $S_1$  FC points of the (a)  $E_{out}$ , (b)  $Z_{in}$ , (c)  $E_{in}$  and (d)  $Z_{out}$  isomers of motor **2d**. Shown are also molecular geometries along the respective path and the corresponding  $\omega$  dihedral angles.

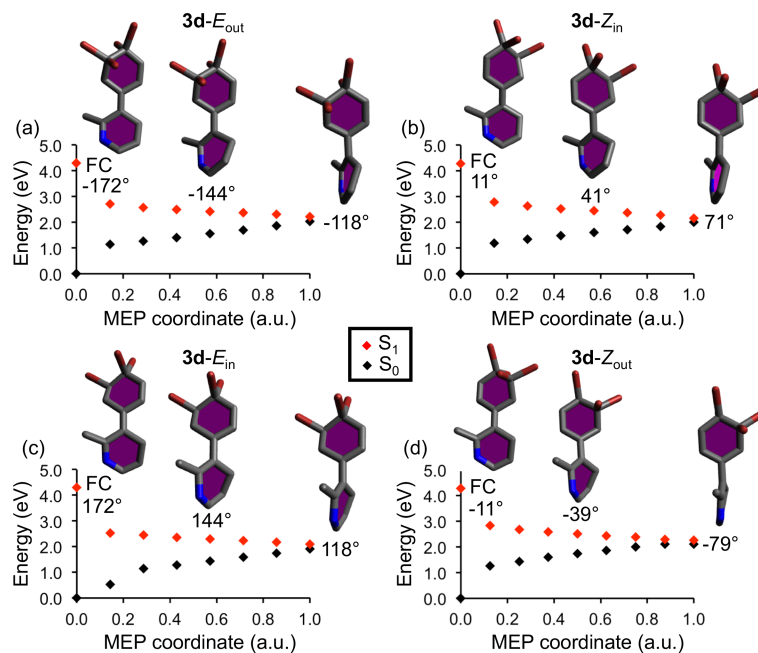

**Figure S5.** SA-CASSCF photoisomerization MEPs from the  $S_1$  FC points of the (a)  $E_{out}$ , (b)  $Z_{in}$ , (c)  $E_{in}$  and (d)  $Z_{out}$  isomers of motor **3d**. Shown are also molecular geometries along the respective path and the corresponding  $\omega$  dihedral angles.

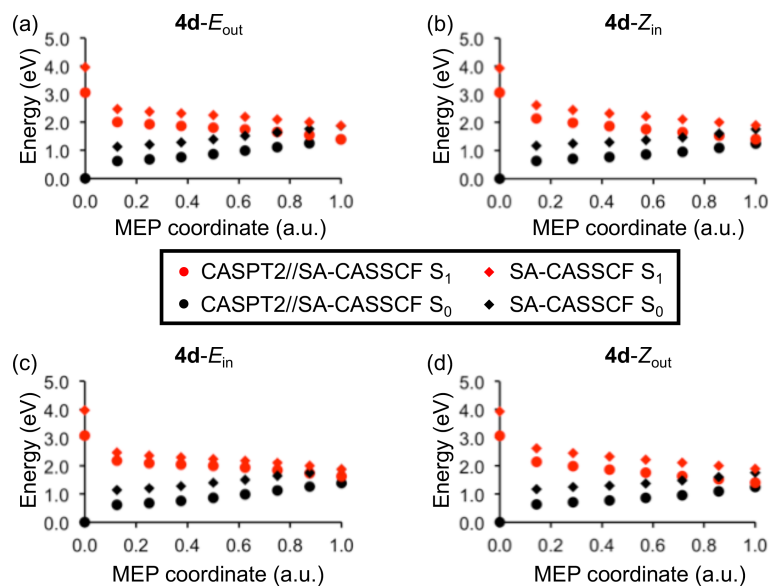

**Figure S6.** Comparison of CASPT2//SA-CASSCF and SA-CASSCF photoisomerization MEPs from the  $S_1$  FC points of the (a)  $E_{out}$ , (b)  $Z_{in}$ , (c)  $E_{in}$  and (d)  $Z_{out}$  isomers of motor **4d**.

| <b>Table S1.</b> CASSCF occupation numbers for active molecular orbitals 1–10 in the S <sub>0</sub> and S <sub>1</sub> states of the <i>E</i> <sub>out</sub> / <i>E</i> <sub>in</sub> and <i>Z</i> <sub>out</sub> / <i>Z</i> <sub>in</sub> isomers of motor <b>4d</b> <sup>[a]</sup> |                |                          |      |      |      |      |      |      |      |      |      |
|--------------------------------------------------------------------------------------------------------------------------------------------------------------------------------------------------------------------------------------------------------------------------------------|----------------|--------------------------|------|------|------|------|------|------|------|------|------|
| Isomer                                                                                                                                                                                                                                                                               | State          | Active molecular orbital |      |      |      |      |      |      |      |      |      |
|                                                                                                                                                                                                                                                                                      |                | 1                        | 2    | 3    | 4    | 5    | 6    | 7    | 8    | 9    | 10   |
| <i>E</i> <sub>out</sub> / <i>E</i> <sub>in</sub>                                                                                                                                                                                                                                     | S <sub>0</sub> | 1.97                     | 1.96 | 1.94 | 1.92 | 1.88 | 0.07 | 0.05 | 0.03 | 0.04 | 0.13 |
|                                                                                                                                                                                                                                                                                      | S <sub>1</sub> | 1.97                     | 1.95 | 1.94 | 1.90 | 1.02 | 0.98 | 0.05 | 0.06 | 0.03 | 0.10 |
| <i>Z</i> <sub>out</sub> / <i>Z</i> <sub>in</sub>                                                                                                                                                                                                                                     | S <sub>0</sub> | 1.97                     | 1.96 | 1.92 | 1.94 | 1.88 | 0.03 | 0.13 | 0.04 | 0.05 | 0.07 |
|                                                                                                                                                                                                                                                                                      | S <sub>1</sub> | 1.97                     | 1.95 | 1.89 | 1.93 | 1.10 | 0.90 | 0.11 | 0.03 | 0.05 | 0.06 |

[a] All calculations carried out with the cc-pVTZ basis set and CASSCF/cc-pVTZ S<sub>0</sub> equilibrium geometries.

| <b>Table S2.</b> Vertical CC2 excitation energies (in eV) of the $E_{out}/E_{in}$ and $Z_{out}/Z_{in}$ isomers of motors <b>1a–4d</b> <sup>[a]</sup> |                       |                        |             |             |             |             |
|------------------------------------------------------------------------------------------------------------------------------------------------------|-----------------------|------------------------|-------------|-------------|-------------|-------------|
| Isomer                                                                                                                                               | Excitation            | 4' and 5' substituents | Motor       |             |             |             |
|                                                                                                                                                      |                       |                        | <b>1</b>    | <b>2</b>    | <b>3</b>    | <b>4</b>    |
| $E_{out}/E_{in}$                                                                                                                                     | $S_0 \rightarrow S_1$ | R = H ( <b>a</b> )     | 3.82 (0.70) | 3.32 (1.05) | 3.09 (0.42) | 2.79 (0.72) |
|                                                                                                                                                      | $S_0 \rightarrow S_2$ | R = H ( <b>a</b> )     | 5.32 (0.03) | 4.85 (0.06) | 4.35 (0.18) | 3.94 (0.24) |
|                                                                                                                                                      | $S_0 \rightarrow S_1$ | R = Me ( <b>b</b> )    | 3.73 (0.73) | 3.23 (0.95) | 3.05 (0.47) | 2.74 (0.71) |
|                                                                                                                                                      | $S_0 \rightarrow S_2$ | R = Me ( <b>b</b> )    | 4.86 (0.03) | 4.61 (0.10) | 4.17 (0.12) | 3.79 (0.16) |
|                                                                                                                                                      | $S_0 \rightarrow S_1$ | R = Cl ( <b>c</b> )    | 3.81 (0.71) | 3.17 (0.89) | 3.08 (0.45) | 2.71 (0.71) |
|                                                                                                                                                      | $S_0 \rightarrow S_2$ | R = Cl ( <b>c</b> )    | 4.67 (0.02) | 4.46 (0.13) | 4.13 (0.10) | 3.65 (0.13) |
|                                                                                                                                                      | $S_0 \rightarrow S_1$ | R = Br ( <b>d</b> )    | 3.55 (0.52) | 3.08 (0.78) | 2.97 (0.50) | 2.65 (0.69) |
|                                                                                                                                                      | $S_0 \rightarrow S_2$ | R = Br ( <b>d</b> )    | 3.85 (0.01) | 3.75 (0.01) | 3.55 (0.01) | 3.45 (0.04) |
| $Z_{out}/Z_{in}$                                                                                                                                     | $S_0 \rightarrow S_1$ | R = H ( <b>a</b> )     | 3.81 (0.62) | 3.31 (0.88) | 3.06 (0.42) | 2.76 (0.68) |
|                                                                                                                                                      | $S_0 \rightarrow S_2$ | R = H ( <b>a</b> )     | 5.39 (0.05) | 4.96 (0.09) | 4.39 (0.05) | 4.03 (0.05) |
|                                                                                                                                                      | $S_0 \rightarrow S_1$ | R = Me ( <b>b</b> )    | 3.72 (0.65) | 3.22 (0.81) | 3.01 (0.46) | 2.71 (0.67) |
|                                                                                                                                                      | $S_0 \rightarrow S_2$ | R = Me ( <b>b</b> )    | 4.90 (0.06) | 4.66 (0.12) | 4.22 (0.03) | 3.87 (0.02) |
|                                                                                                                                                      | $S_0 \rightarrow S_1$ | R = Cl ( <b>c</b> )    | 3.82 (0.66) | 3.18 (0.77) | 3.08 (0.45) | 2.70 (0.67) |
|                                                                                                                                                      | $S_0 \rightarrow S_2$ | R = Cl ( <b>c</b> )    | 4.70 (0.02) | 4.52 (0.14) | 4.17 (0.04) | 3.74 (0.02) |
|                                                                                                                                                      | $S_0 \rightarrow S_1$ | R = Br ( <b>d</b> )    | 3.57 (0.50) | 3.09 (0.69) | 2.97 (0.49) | 2.65 (0.65) |
|                                                                                                                                                      | $S_0 \rightarrow S_2$ | R = Br ( <b>d</b> )    | 3.87 (0.02) | 3.76 (0.01) | 3.60 (0.01) | 3.51 (0.01) |

[a] All calculations carried out with the cc-pVTZ basis set and MP2/cc-pVTZ  $S_0$  equilibrium geometries. Oscillator strengths in parentheses.

| <b>Table S3.</b> Vertical CASPT2 excitation energies (in eV) of the $E_{out}/E_{in}$ and $Z_{out}/Z_{in}$ isomers of motors <b>1a–4d</b> <sup>[a]</sup> |                       |                        |             |             |             |             |
|---------------------------------------------------------------------------------------------------------------------------------------------------------|-----------------------|------------------------|-------------|-------------|-------------|-------------|
| Isomer                                                                                                                                                  | Excitation            | 4' and 5' substituents | Motor       |             |             |             |
|                                                                                                                                                         |                       |                        | <b>1</b>    | <b>2</b>    | <b>3</b>    | <b>4</b>    |
| $E_{out}/E_{in}$                                                                                                                                        | $S_0 \rightarrow S_1$ | R = H ( <b>a</b> )     | 4.00 (0.82) | 3.45 (1.12) | 3.30 (0.66) | 2.94 (0.97) |
|                                                                                                                                                         | $S_0 \rightarrow S_1$ | R = Me ( <b>b</b> )    | 3.91 (0.56) | 3.53 (0.86) | 3.18 (0.68) | 2.93 (0.94) |
|                                                                                                                                                         | $S_0 \rightarrow S_1$ | R = Cl ( <b>c</b> )    | 4.01 (0.74) | 3.41 (0.82) | 3.36 (0.57) | 2.98 (0.81) |
|                                                                                                                                                         | $S_0 \rightarrow S_1$ | R = Br ( <b>d</b> )    | 3.82 (0.66) | 3.32 (0.84) | 3.33 (0.25) | 2.81 (0.85) |
| $Z_{out}/Z_{in}$                                                                                                                                        | $S_0 \rightarrow S_1$ | R = H ( <b>a</b> )     | 4.02 (0.60) | 3.41 (0.81) | 3.23 (0.55) | 2.90 (0.73) |
|                                                                                                                                                         | $S_0 \rightarrow S_1$ | R = Me ( <b>b</b> )    | 3.84 (0.61) | 3.34 (0.77) | 3.16 (0.57) | 2.90 (0.71) |
|                                                                                                                                                         | $S_0 \rightarrow S_1$ | R = Cl ( <b>c</b> )    | 4.05 (0.54) | 3.40 (0.63) | 3.33 (0.50) | 2.95 (0.60) |
|                                                                                                                                                         | $S_0 \rightarrow S_1$ | R = Br ( <b>d</b> )    | 3.86 (0.49) | 3.54 (0.42) | 3.34 (0.29) | 2.83 (0.62) |

[a] All calculations carried out with the cc-pVTZ basis set and CASSCF/cc-pVTZ  $S_0$  equilibrium geometries. Oscillator strengths in parentheses.



| Table S4. Enantiomerization free-energy barriers (in kJ mol <sup>-1</sup> ) for motors <b>1a–4d</b> at different levels of theory <sup>[a]</sup> |                                  |           |       |           |           |           |           |
|--------------------------------------------------------------------------------------------------------------------------------------------------|----------------------------------|-----------|-------|-----------|-----------|-----------|-----------|
| Motor                                                                                                                                            | Enantiomerization                | Gas phase | B3LYP |           | M06-2X    | ωB97X-D   | MP2       |
|                                                                                                                                                  |                                  |           | Water | Cyclohex. | Gas phase | Gas phase | Gas phase |
| <b>1a</b>                                                                                                                                        | $E_{out} \leftrightarrow E_{in}$ | 17.7      | 24.5  | 26.8      | 27.8      | 26.8      | 25.2      |
|                                                                                                                                                  | $Z_{out} \leftrightarrow Z_{in}$ | 20.1      | 23.4  | 23.9      | 23.6      | 24.2      | 25.9      |
| <b>1b</b>                                                                                                                                        | $E_{out} \leftrightarrow E_{in}$ | 46.3      | 43.3  | 47.3      | 48.7      | 45.7      | 51.1      |
|                                                                                                                                                  | $Z_{out} \leftrightarrow Z_{in}$ | 43.3      | 42.0  | 39.9      | 43.2      | 46.5      | 46.8      |
| <b>1c</b>                                                                                                                                        | $E_{out} \leftrightarrow E_{in}$ | 64.2      | 66.2  | 65.5      | 68.4      | 62.8      | 71.9      |
|                                                                                                                                                  | $Z_{out} \leftrightarrow Z_{in}$ | 62.8      | 59.3  | 62.1      | 66.5      | 58.0      | 68.8      |
| <b>1d</b>                                                                                                                                        | $E_{out} \leftrightarrow E_{in}$ | 73.5      | 71.6  | 73.4      | 78.3      | 72.9      | 84.2      |
|                                                                                                                                                  | $Z_{out} \leftrightarrow Z_{in}$ | 73.1      | 74.2  | 68.8      | 76.8      | 73.9      | 81.8      |
| <b>2a</b>                                                                                                                                        | $E_{out} \leftrightarrow E_{in}$ | 22.6      | 25.2  | 28.1      | 28.1      | 26.6      | 29.3      |
|                                                                                                                                                  | $Z_{out} \leftrightarrow Z_{in}$ | 24.5      | 23.7  | 24.2      | 25.6      | 27.7      | 29.6      |
| <b>2b</b>                                                                                                                                        | $E_{out} \leftrightarrow E_{in}$ | 55.6      | 52.8  | 56.5      | 57.1      | 58.3      | 61.2      |
|                                                                                                                                                  | $Z_{out} \leftrightarrow Z_{in}$ | 52.6      | 51.2  | 49.6      | 52.8      | 54.9      | 56.4      |
| <b>2c</b>                                                                                                                                        | $E_{out} \leftrightarrow E_{in}$ | 73.6      | 74.3  | 70.2      | 78.2      | 71.0      | 83.8      |
|                                                                                                                                                  | $Z_{out} \leftrightarrow Z_{in}$ | 73.0      | 71.7  | 69.4      | 77.4      | 68.6      | 80.3      |
| <b>2d</b>                                                                                                                                        | $E_{out} \leftrightarrow E_{in}$ | 85.1      | 89.0  | 82.3      | 91.3      | 84.4      | 96.6      |
|                                                                                                                                                  | $Z_{out} \leftrightarrow Z_{in}$ | 84.3      | 83.8  | 79.4      | 88.2      | 83.5      | 93.1      |
| <b>3a</b>                                                                                                                                        | $E_{out} \leftrightarrow E_{in}$ | 24.5      | 26.1  | 26.2      | 27.9      | 25.3      | 30.1      |
|                                                                                                                                                  | $Z_{out} \leftrightarrow Z_{in}$ | 21.2      | 22.3  | 21.6      | 23.7      | 24.2      | 26.9      |
| <b>3b</b>                                                                                                                                        | $E_{out} \leftrightarrow E_{in}$ | 44.6      | 43.1  | 43.4      | 48.2      | 44.6      | 49.2      |
|                                                                                                                                                  | $Z_{out} \leftrightarrow Z_{in}$ | 41.9      | 41.3  | 38.3      | 44.3      | 43.0      | 44.7      |
| <b>3c</b>                                                                                                                                        | $E_{out} \leftrightarrow E_{in}$ | 63.4      | 64.1  | 63.9      | 67.4      | 60.2      | 69.3      |
|                                                                                                                                                  | $Z_{out} \leftrightarrow Z_{in}$ | 61.6      | 63.6  | 59.1      | 65.4      | 58.1      | 65.3      |
| <b>3d</b>                                                                                                                                        | $E_{out} \leftrightarrow E_{in}$ | 72.4      | 77.6  | 77.8      | 81.3      | 71.7      | 79.9      |
|                                                                                                                                                  | $Z_{out} \leftrightarrow Z_{in}$ | 71.5      | 75.9  | 72.3      | 76.4      | 71.4      | 77.5      |
| <b>4a</b>                                                                                                                                        | $E_{out} \leftrightarrow E_{in}$ | 26.4      | 26.6  | 27.3      | 28.1      | 26.9      | 32.0      |
|                                                                                                                                                  | $Z_{out} \leftrightarrow Z_{in}$ | 21.4      | 23.3  | 22.0      | 24.4      | 25.7      | 26.5      |
| <b>4b</b>                                                                                                                                        | $E_{out} \leftrightarrow E_{in}$ | 53.0      | 54.8  | 51.9      | 56.4      | 55.5      | 58.5      |
|                                                                                                                                                  | $Z_{out} \leftrightarrow Z_{in}$ | 50.9      | 48.3  | 43.7      | 53.4      | 47.5      | 54.1      |
| <b>4c</b>                                                                                                                                        | $E_{out} \leftrightarrow E_{in}$ | 72.5      | 72.2  | 72.0      | 77.7      | 69.4      | 76.0      |
|                                                                                                                                                  | $Z_{out} \leftrightarrow Z_{in}$ | 70.3      | 69.1  | 69.5      | 75.0      | 69.0      | 75.0      |
| <b>4d</b>                                                                                                                                        | $E_{out} \leftrightarrow E_{in}$ | 83.4      | 84.9  | 81.9      | 90.1      | 85.0      | 93.0      |
|                                                                                                                                                  | $Z_{out} \leftrightarrow Z_{in}$ | 82.4      | 84.4  | 83.5      | 86.7      | 81.9      | 89.3      |

[a] All calculations carried out with the cc-pVTZ basis set in the gas phase or in combination with an SMD description of the solvent (water or cyclohexane).

**Table S5.**  $\alpha$  and  $\alpha'$  pyramidalization dihedral angles along the photoisomerization MEPs of the different isomers of motor **4d**

| Isomer    | MEP point | $\alpha$ [deg.] | $\alpha'$ [deg.] |
|-----------|-----------|-----------------|------------------|
| $E_{out}$ | 1         | 0               | 0                |
|           | 2         | 1               | -3               |
|           | 3         | 2               | -3               |
|           | 4         | 1               | -2               |
|           | 5         | 1               | -3               |
|           | 6         | 1               | -3               |
|           | 7         | 1               | -2               |
|           | 8         | 1               | -2               |
|           | 9         | 1               | -2               |
| $Z_{in}$  | 1         | -1              | 3                |
|           | 2         | -1              | 4                |
|           | 3         | -1              | 3                |
|           | 4         | -1              | 3                |
|           | 5         | -1              | 2                |
|           | 6         | -1              | 2                |
|           | 7         | -1              | 3                |
|           | 8         | -1              | 3                |
| $E_{in}$  | 1         | 0               | 0                |
|           | 2         | -2              | -3               |
|           | 3         | -2              | -3               |
|           | 4         | -1              | -3               |
|           | 5         | -1              | -3               |
|           | 6         | -1              | -3               |
|           | 7         | -1              | -3               |
|           | 8         | -1              | -2               |
|           | 9         | -1              | -2               |
| $Z_{out}$ | 1         | 1               | -3               |
|           | 2         | 1               | -4               |
|           | 3         | 1               | -3               |
|           | 4         | 0               | -3               |
|           | 5         | 1               | -2               |
|           | 6         | 1               | -2               |
|           | 7         | 1               | -3               |
|           | 8         | 1               | -3               |

## Description of multimedia files

### **4d-e-out-z-in.mov**

This movie from the NAMD simulations of motor **4d** shows two representative trajectories merged together to illustrate a full  $360^\circ$  CCW  $E_{\text{out}} \rightarrow Z_{\text{in}} \rightarrow E_{\text{out}}$  rotation around the central olefinic bond.

### **4d-e-in-z-out.mov**

This movie from the NAMD simulations of motor **4d** shows two representative trajectories merged together to illustrate a full  $360^\circ$  CW  $E_{\text{in}} \rightarrow Z_{\text{out}} \rightarrow E_{\text{in}}$  rotation around the central olefinic bond.

## References for the Supporting Information

- [1] T. H. Dunning, Jr., *J. Chem. Phys.* **1989**, *90*, 1007–1023.
- [2] B. O. Roos, P. R. Taylor, P. E. M. Siegbahn, *Chem. Phys.* **1980**, *48*, 157–173.
- [3] K. Andersson, P.-Å. Malmqvist, B. O. Roos, *J. Chem. Phys.* **1992**, *96*, 1218–1226.
- [4] P.-Å. Malmqvist, B. O. Roos, *Chem. Phys. Lett.* **1989**, *155*, 189–194.
- [5] O. Christiansen, H. Koch, P. Jørgensen, *Chem. Phys. Lett.* **1995**, *243*, 409–418.
- [6] M. Feyereisen, G. Fitzgerald, A. Komornicki, *Chem. Phys. Lett.* **1993**, *208*, 359–363.
- [7] O. Vahtras, J. Almlöf, M. W. Feyereisen, *Chem. Phys. Lett.* **1993**, *213*, 514–518.
- [8] A. V. Marenich, C. J. Cramer, D. G. Truhlar, *J. Phys. Chem. B* **2009**, *113*, 6378–6396.
- [9] Y. Zhao, D. G. Truhlar, *Theor. Chem. Acc.* **2008**, *120*, 215–241.
- [10] J.-D. Chai, M. Head-Gordon, *Phys. Chem. Chem. Phys.* **2008**, *10*, 6615–6620.
- [11] A. Schäfer, H. Horn, R. Ahlrichs, *J. Chem. Phys.* **1992**, *97*, 2571–2577.
- [12] J. P. Dahl, M. Springborg, *J. Chem. Phys.* **1988**, *88*, 4535–4547.
- [13] R. Schinke in *Photodissociation Dynamics: Spectroscopy and Fragmentation of Small Polyatomic Molecules*, Cambridge University Press, Cambridge, U.K., **1993**.
- [14] L. Verlet, *Phys. Rev.* **1967**, *159*, 98–103.
- [15] M. Desouter-Lecomte, J. C. Lorquet, *J. Chem. Phys.* **1979**, *71*, 4391–4403.
- [16] C. Wittig, *J. Phys. Chem. B* **2005**, *109*, 8428–8430.
- [17] G. Groenhof, M. Bouxin-Cademartory, B. Hess, S. P. de Visser, H. J. C. Berendsen, M. Olivucci, A. E. Mark, M. A. Robb, *J. Am. Chem. Soc.* **2004**, *126*, 4228–4233.
- [18] L. V. Schäfer, G. Groenhof, M. Boggio-Pasqua, M. A. Robb, H. Grubmüller, *PLoS Comput. Biol.* **2008**, *4*, e1000034.
- [19] F. Aquilante, J. Autschbach, R. K. Carlson, L. F. Chibotaru, M. G. Delcey, L. De Vico, I. Fdez. Galván, N. Ferré, L. M. Frutos, L. Gagliardi, M. Garavelli, A. Giussani, C. E. Hoyer, G. L. Manni, H. Lischka, D. Ma, P.-Å. Malmqvist, T. Müller, A. Nenov, M. Olivucci, T. B. Pedersen, D. Peng, F. Plasser, B. Pritchard, M. Reiher, I. Rivalta, I. Schapiro, J. Segarra-Martí, M. Stenrup, D. G. Truhlar, L. Ungur, A. Valentini, S. Vancoillie, V. Veryazov, V. P. Vysotskiy, O. Weingart, F. Zapata, R. Lindh, *J. Comput. Chem.* **2016**, *37*, 506–541.
- [20] J. Wang, B. Oruganti, B. Durbeej, *Phys. Chem. Chem. Phys.* **2017**, *19*, 6952–6956.
- [21] M. J. Frisch, G. W. Trucks, H. B. Schlegel, G. E. Scuseria, M. A. Robb, J. R. Cheeseman, G. Scalmani, V. Barone, B. Mennucci, G. A. Petersson, H. Nakatsuji, M. Caricato, X. Li,

- H. P. Hratchian, A. F. Izmaylov, J. Bloino, G. Zheng, J. L. Sonnenberg, M. Hada, M. Ehara, K. Toyota, R. Fukuda, J. Hasegawa, M. Ishida, T. Nakajima, Y. Honda, O. Kitao, H. Nakai, T. Vreven, J. A. Montgomery, Jr., J. E. Peralta, F. Ogliaro, M. Bearpark, J. J. Heyd, E. Brothers, K. N. Kudin, V. N. Staroverov, R. Kobayashi, J. Normand, K. Raghavachari, A. Rendell, J. C. Burant, S. S. Iyengar, J. Tomasi, M. Cossi, N. Rega, J. M. Millam, M. Klene, J. E. Knox, J. B. Cross, V. Bakken, C. Adamo, J. Jaramillo, R. Gomperts, R. E. Stratmann, O. Yazyev, A. J. Austin, R. Cammi, C. Pomelli, J. W. Ochterski, R. L. Martin, K. Morokuma, V. G. Zakrzewski, G. A. Voth, P. Salvador, J. J. Dannenberg, S. Dapprich, A. D. Daniels, Ö. Farkas, J. B. Foresman, J. V. Ortiz, J. Cioslowski, D. J. Fox, *Gaussian 09, Revision D.01*, Gaussian, Inc., Wallingford CT, USA, **2009**.
- [22] R. Ahlrichs, M. Bär, M. Häser, H. Horn, C. Kölmel, *Chem. Phys. Lett.* **1989**, *162*, 165–169.
- [23] TURBOMOLE V6.6 2014, a development of University of Karlsruhe and Forschungszentrum Karlsruhe GmbH, 1989–2007, TURBOMOLE GmbH, since 2007; available at: <http://www.turbomole.com> (accessed April 24, 2018).
- [24] F. Lumento, V. Zanirato, S. Fusi, E. Busi, L. Latterini, F. Elisei, A. Sinicropi, T. Andruniów, N. Ferré, R. Basosi, M. Olivucci, *Angew. Chem. Int. Ed.* **2007**, *46*, 414–420.
- [25] R. E. Gawley, S. R. Chemburkar, *Heterocycles* **1989**, *29*, 1283–1292.

## Cartesian coordinates (in Å) for CASSCF $S_0$ equilibrium geometries of motors

### 1a–4d

---

#### 1a- $E_{\text{out}}$

|   |             |             |             |
|---|-------------|-------------|-------------|
| C | -3.02385830 | -1.22029694 | 0.23365109  |
| C | -1.82841062 | 0.76053164  | -0.05572181 |
| C | -0.81037590 | -0.27614444 | -0.03305658 |
| C | -1.55389879 | -1.60755317 | 0.03089133  |
| C | 0.54100527  | -0.13762017 | -0.09478952 |
| C | 1.37845939  | -1.36303431 | -0.17350957 |
| C | 1.30425357  | 1.16898098  | -0.14543547 |
| C | 2.72115919  | -1.31861580 | -0.19337078 |
| C | 2.66705510  | 1.06053058  | 0.53940291  |
| H | 1.44762669  | 1.43365569  | -1.19012785 |
| H | 0.75048239  | 1.96923153  | 0.31366115  |
| C | 3.51310116  | -0.05274780 | -0.06181498 |
| H | 3.17927260  | 2.01033717  | 0.46068643  |
| H | 2.51836166  | 0.86740981  | 1.59672983  |
| H | 4.38832118  | -0.23446023 | 0.54922534  |
| H | 3.88383629  | 0.23503522  | -1.04251414 |
| H | -3.68994987 | -1.65491540 | -0.49496667 |
| H | 3.26330983  | -2.23779851 | -0.31467389 |
| H | 0.88789688  | -2.31128609 | -0.25793876 |
| H | -1.20190022 | -2.22589488 | 0.84163905  |
| H | -1.43069620 | -2.16427446 | -0.88764628 |
| H | -3.39210356 | -1.45176937 | 1.22219284  |
| H | -3.82461336 | 0.78434010  | 0.05929865  |
| C | -1.70254404 | 2.23857374  | -0.21392635 |
| H | -1.26855928 | 2.66203781  | 0.68188484  |
| H | -1.06083607 | 2.47562034  | -1.04829543 |
| H | -2.67263358 | 2.68616679  | -0.37250699 |
| N | -2.99461043 | 0.23471113  | 0.06227360  |

**1a-Z<sub>in</sub>**

|   |             |             |             |
|---|-------------|-------------|-------------|
| C | 3.01297533  | -1.25587278 | -0.11010099 |
| C | 1.52304520  | -1.60980863 | -0.03306226 |
| C | 0.80649784  | -0.26286216 | -0.03826220 |
| C | 1.84228573  | 0.75167394  | 0.07906262  |
| H | 3.60620753  | -1.70806266 | 0.66895833  |
| H | 3.45710103  | -1.49178974 | -1.06590911 |
| H | 1.22764946  | -2.22706415 | -0.86706780 |
| H | 1.30977227  | -2.15814905 | 0.87405675  |
| C | -0.54086492 | -0.10169572 | -0.12138252 |
| C | -1.24819990 | 1.20099462  | -0.22175675 |
| C | -1.43704886 | -1.31960254 | -0.19828606 |
| C | -2.58971071 | 1.28255023  | -0.22786665 |
| C | -2.77340948 | -1.09497321 | 0.50593987  |
| H | -1.61121148 | -1.53466995 | -1.25007495 |
| H | -0.94580234 | -2.18473569 | 0.22025518  |
| C | -3.50764970 | 0.10802315  | -0.06984630 |
| H | -3.37965320 | -1.98655318 | 0.41795456  |
| H | -2.59576211 | -0.93686465 | 1.56474390  |
| H | -4.34184229 | 0.38411096  | 0.56306585  |
| H | -3.93293130 | -0.13319269 | -1.04087557 |
| H | 3.84030600  | 0.72909691  | 0.14593821  |
| H | -3.03965541 | 2.24818086  | -0.36613840 |
| C | 1.73667790  | 2.23163806  | 0.22976997  |
| H | 1.37068148  | 2.66338254  | -0.69205536 |
| H | 1.04656427  | 2.47869980  | 1.02224103  |
| H | 2.70275266  | 2.65996297  | 0.45254112  |
| H | -0.68763694 | 2.10092419  | -0.34370008 |
| N | 3.00153695  | 0.19888059  | 0.06562560  |

**1a- $E_{in}$** 

|   |             |             |             |
|---|-------------|-------------|-------------|
| C | 3.02421004  | -1.22022846 | 0.23256306  |
| C | 1.82840349  | 0.76073795  | -0.05491008 |
| C | 0.81039310  | -0.27595945 | -0.03250930 |
| C | 1.55386348  | -1.60736077 | 0.03225454  |
| C | -0.54097071 | -0.13759624 | -0.09497187 |
| C | -1.37824595 | -1.36317434 | -0.17329480 |
| C | -1.30447113 | 1.16878264  | -0.14707563 |
| C | -2.72094250 | -1.31897745 | -0.19314120 |
| C | -2.66726506 | 1.06078487  | 0.53784439  |
| H | -0.75095511 | 1.96970734  | 0.31108256  |
| H | -1.44783713 | 1.43219377  | -1.19207782 |
| C | -3.51314538 | -0.05321311 | -0.06227236 |
| H | -3.88427509 | 0.23371355  | -1.04305868 |
| H | -4.38810690 | -0.23472896 | 0.54918227  |
| H | 3.39445709  | -1.45264103 | 1.22011404  |
| H | -3.26293499 | -2.23832089 | -0.31390435 |
| H | -0.88755674 | -2.31141860 | -0.25701737 |
| H | 1.42932281  | -2.16544661 | -0.88523905 |
| H | 1.20275929  | -2.22438991 | 0.84440734  |
| H | 3.68887689  | -1.65410596 | -0.49780216 |
| H | 3.82461046  | 0.78459197  | 0.05945933  |
| C | 1.70248142  | 2.23889605  | -0.21200802 |
| H | 1.06229031  | 2.47644839  | -1.04742099 |
| H | 1.26668267  | 2.66147230  | 0.68331247  |
| H | 2.67273466  | 2.68689155  | -0.36837654 |
| H | -3.17964019 | 2.01042049  | 0.45817279  |
| H | -2.51853684 | 0.86875090  | 1.59535776  |
| N | 2.99464396  | 0.23491800  | 0.06256470  |



**1a-Z<sub>out</sub>**

|   |             |             |             |
|---|-------------|-------------|-------------|
| C | -3.01320385 | -1.25626889 | -0.10722256 |
| C | -1.84211036 | 0.75148754  | 0.07819498  |
| C | -0.80646053 | -0.26302456 | -0.04040806 |
| C | -1.52291034 | -1.61004075 | -0.03559279 |
| C | 0.54088066  | -0.10174374 | -0.12352432 |
| C | 1.24819558  | 1.20107791  | -0.22321540 |
| C | 1.43746158  | -1.31931953 | -0.20034484 |
| C | 2.58969846  | 1.28279339  | -0.22694425 |
| C | 2.77224793  | -1.09490966 | 0.50698022  |
| H | 0.94573200  | -2.18524203 | 0.21595745  |
| H | 1.61393573  | -1.53285173 | -1.25205858 |
| C | 3.50754677  | 0.10852404  | -0.06656286 |
| H | 3.93549960  | -0.13235187 | -1.03650630 |
| H | 4.33998369  | 0.38478264  | 0.56859811  |
| H | -3.46124390 | -1.49360413 | -1.06083158 |
| H | 3.03978115  | 2.24841159  | -0.36489424 |
| H | 0.68768962  | 2.10077320  | -0.34721579 |
| H | -1.30667496 | -2.16044491 | 0.86953062  |
| H | -1.23000176 | -2.22533543 | -0.87196279 |
| H | -3.60318583 | -1.70745748 | 0.67491142  |
| H | -3.84000324 | 0.72890702  | 0.14842754  |
| C | -1.73633463 | 2.23150350  | 0.22836954  |
| H | -1.04476329 | 2.47881296  | 1.01947049  |
| H | -1.37209876 | 2.66308261  | -0.69424543 |
| H | -2.70202187 | 2.65978290  | 0.45290891  |
| H | 3.37885698  | -1.98632633 | 0.41983082  |
| H | 2.59221071  | -0.93746431 | 1.56548858  |
| N | -3.00137117 | 0.19868104  | 0.06669615  |

**1b- $E_{out}$** 

|   |             |             |             |
|---|-------------|-------------|-------------|
| C | -4.11530796 | -1.05756363 | 0.35095198  |
| C | -2.75591437 | 0.76686299  | -0.15972272 |
| C | -1.83765799 | -0.35740513 | -0.08051863 |
| C | -2.69941378 | -1.60100766 | 0.12572719  |
| C | -0.48363186 | -0.36133977 | -0.20257419 |
| C | 0.22525416  | -1.63877323 | -0.19312321 |
| C | 0.39807900  | 0.84753100  | -0.40720339 |
| C | 1.56250620  | -1.71749310 | -0.19896565 |
| C | 1.77230193  | 0.75472249  | 0.29694600  |
| H | 0.54439744  | 0.96418989  | -1.47566112 |
| H | -0.07912157 | 1.74633006  | -0.05857930 |
| C | 2.53376295  | -0.52024319 | -0.19363869 |
| H | -4.85395965 | -1.48814240 | -0.30665607 |
| H | 2.01672935  | -2.69175420 | -0.22930009 |
| H | -0.34564887 | -2.54513667 | -0.19794031 |
| H | -2.36992734 | -2.18292132 | 0.97203639  |
| H | -2.67201682 | -2.23979045 | -0.74611126 |
| H | -4.45446523 | -1.16404092 | 1.37084720  |
| H | -4.73381902 | 0.99218016  | 0.02669236  |
| C | -2.50461191 | 2.20779654  | -0.45291203 |
| H | -1.98354421 | 2.66049440  | 0.37971134  |
| H | -1.89186406 | 2.31146234  | -1.33502947 |
| H | -3.43723355 | 2.73149239  | -0.60338108 |
| N | -3.95948494 | 0.36690305  | 0.04532187  |
| C | 2.53330725  | 2.04712870  | -0.03206706 |
| H | 2.02270914  | 2.89972097  | 0.40144130  |
| H | 3.53436980  | 2.03400129  | 0.37737039  |
| H | 2.61080498  | 2.21981112  | -1.09703144 |
| C | 1.53689980  | 0.72768865  | 1.81836581  |
| H | 2.46239355  | 0.85434418  | 2.36131945  |
| H | 0.88671334  | 1.54665104  | 2.10662641  |
| H | 1.08015646  | -0.19334252 | 2.15707638  |
| C | 3.07464296  | -0.38120300 | -1.63077341 |
| H | 3.89642994  | 0.32044042  | -1.67343182 |
| H | 3.44898115  | -1.33732495 | -1.97528223 |
| H | 2.31786141  | -0.06090991 | -2.33515501 |
| C | 3.71740975  | -0.89217692 | 0.71494423  |
| H | 4.25937117  | -1.72645120 | 0.28654380  |
| H | 4.41523255  | -0.07093716 | 0.81136997  |
| H | 3.40133083  | -1.18484335 | 1.70651010  |

**1b-Z<sub>in</sub>**

|   |             |             |             |
|---|-------------|-------------|-------------|
| C | 3.92237923  | -1.36034806 | -0.21449377 |
| C | 2.40572284  | -1.58360620 | -0.22555244 |
| C | 1.80529679  | -0.18329992 | -0.13043208 |
| C | 2.92127873  | 0.72735278  | 0.10494340  |
| H | 4.44189684  | -1.91862581 | 0.54808307  |
| H | 4.39216328  | -1.55112161 | -1.16771652 |
| H | 2.09954848  | -2.09424854 | -1.12505247 |
| H | 2.10782018  | -2.19219786 | 0.61651014  |
| C | 0.48249296  | 0.10104724  | -0.23633901 |
| C | -0.10853126 | 1.43738728  | -0.21714512 |
| C | -0.51265263 | -1.01242415 | -0.46693385 |
| C | -1.43656640 | 1.62224898  | -0.20232053 |
| C | -1.86044426 | -0.81398767 | 0.25984485  |
| H | -0.67777457 | -1.07797673 | -1.53737528 |
| H | -0.10059530 | -1.96318168 | -0.16346020 |
| C | -2.49775485 | 0.54418467  | -0.18950543 |
| H | 4.91123351  | 0.52070730  | 0.22417018  |
| H | -1.79977434 | 2.63435609  | -0.22881724 |
| C | 2.93840915  | 2.19724842  | 0.37220943  |
| H | 2.62731662  | 2.73446149  | -0.51291134 |
| H | 2.26064703  | 2.43886654  | 1.17689240  |
| H | 3.93320254  | 2.52304330  | 0.64074823  |
| H | 0.51811374  | 2.30121273  | -0.24308554 |
| N | 4.03116738  | 0.07388592  | 0.08121295  |
| C | -2.74661800 | -2.01912844 | -0.08463381 |
| H | -2.31274599 | -2.92501241 | 0.32282673  |
| H | -3.73684776 | -1.92017519 | 0.33968205  |
| H | -2.85260756 | -2.16044308 | -1.15164601 |
| C | -1.60214382 | -0.84488976 | 1.77764860  |
| H | -2.52716966 | -0.89968063 | 2.33350445  |
| H | -1.02407709 | -1.72529595 | 2.03544751  |
| H | -1.05897671 | 0.02339919  | 2.12895968  |
| C | -3.62472296 | 1.00689028  | 0.75149228  |
| H | -4.09383351 | 1.89717554  | 0.35047518  |
| H | -4.39418544 | 0.25244191  | 0.84680569  |
| H | -3.26306791 | 1.24748876  | 1.74150956  |
| C | -3.08801753 | 0.48122570  | -1.61465757 |
| H | -3.97417302 | -0.13756841 | -1.64377019 |
| H | -3.37703260 | 1.47455612  | -1.93557289 |
| H | -2.38349714 | 0.10053886  | -2.34249713 |

**1b- $E_{in}$** 

|   |             |             |             |
|---|-------------|-------------|-------------|
| C | 4.11451329  | -1.05705123 | 0.35437949  |
| C | 2.75582161  | 0.76698939  | -0.15970072 |
| C | 1.83759224  | -0.35748305 | -0.08146635 |
| C | 2.69930748  | -1.60094146 | 0.12578593  |
| C | 0.48361590  | -0.36146607 | -0.20427089 |
| C | -0.22538787 | -1.63891548 | -0.19538148 |
| C | -0.39819479 | 0.84731844  | -0.40873293 |
| C | -1.56270424 | -1.71730086 | -0.20074761 |
| C | -1.77191847 | 0.75463728  | 0.29653683  |
| H | 0.07925382  | 1.74639856  | -0.06112785 |
| H | -0.54546780 | 0.96336008  | -1.47714982 |
| C | -2.53384780 | -0.52021238 | -0.19369852 |
| H | 4.45101802  | -1.16311274 | 1.37522707  |
| H | -2.01721481 | -2.69145326 | -0.23133411 |
| H | 0.34541795  | -2.54536109 | -0.20136632 |
| H | 2.67400882  | -2.23912439 | -0.74659750 |
| H | 2.36825876  | -2.18363138 | 0.97095426  |
| H | 4.85492165  | -1.48780288 | -0.30116220 |
| H | 4.73348304  | 0.99258741  | 0.02954268  |
| C | 2.50489366  | 2.20773806  | -0.45446394 |
| H | 1.89285029  | 2.31069358  | -1.33715035 |
| H | 1.98327618  | 2.66138218  | 0.37731256  |
| H | 3.43774694  | 2.73111810  | -0.60470148 |
| N | 3.95909686  | 0.36735667  | 0.04778812  |
| C | -3.71630658 | -0.89281108 | 0.71620489  |
| H | -4.41432215 | -0.07187300 | 0.81382594  |
| H | -4.25847754 | -1.72718242 | 0.28823223  |
| H | -3.39889437 | -1.18580937 | 1.70725507  |
| C | -3.07654586 | -0.38061964 | -1.63009955 |
| H | -3.45144434 | -1.33652938 | -1.97462790 |
| H | -3.89829828 | 0.32113530  | -1.67148212 |
| H | -2.32062629 | -0.06021958 | -2.33536474 |
| C | -1.53545536 | 0.72734759  | 1.81780177  |
| H | -0.88475049 | 1.54598300  | 2.10583388  |
| H | -2.46057282 | 0.85433484  | 2.36132179  |
| H | -1.07892526 | -0.19392972 | 2.15615039  |
| C | -2.53293993 | 2.04727221  | -0.03177655 |
| H | -2.02180772 | 2.89965935  | 0.40152814  |
| H | -2.61101219 | 2.22019144  | -1.09666306 |
| H | -3.53378458 | 2.03437493  | 0.37822499  |

**1b-Z<sub>out</sub>**

|   |             |             |             |
|---|-------------|-------------|-------------|
| C | -3.92255903 | -1.35956788 | -0.21774634 |
| C | -2.92061904 | 0.72678684  | 0.10696454  |
| C | -1.80516455 | -0.18388812 | -0.13087407 |
| C | -2.40608415 | -1.58397009 | -0.22575508 |
| C | -0.48251992 | 0.10047983  | -0.23821660 |
| C | 0.10823859  | 1.43700358  | -0.22114157 |
| C | 0.51284681  | -1.01285020 | -0.46825748 |
| C | 1.43624183  | 1.62206052  | -0.20629642 |
| C | 1.85999290  | -0.81362921 | 0.25959697  |
| H | 0.10086365  | -1.96366629 | -0.16484074 |
| H | 0.67882374  | -1.07849011 | -1.53855284 |
| C | 2.49759875  | 0.54417885  | -0.19051754 |
| H | -4.38991965 | -1.54650310 | -1.17294508 |
| H | 1.79938279  | 2.63413457  | -0.23501472 |
| H | -0.51863465 | 2.30061065  | -0.24991936 |
| H | -2.11021310 | -2.19172315 | 0.61768182  |
| H | -2.09857605 | -2.09589424 | -1.12403664 |
| H | -4.44457431 | -1.92011167 | 0.54143265  |
| H | -4.91063828 | 0.52065075  | 0.22673029  |
| C | -2.93665814 | 2.19593638  | 0.37837872  |
| H | -2.25563970 | 2.43530694  | 1.18096289  |
| H | -2.62911313 | 2.73564683  | -0.50647929 |
| H | -3.93038399 | 2.52097015  | 0.65176323  |
| N | -4.03077879 | 0.07379453  | 0.08258964  |
| C | 1.60028451  | -0.84304574 | 1.77719613  |
| H | 1.02179186  | -1.72307991 | 2.03531944  |
| H | 2.52479832  | -0.89748205 | 2.33394045  |
| H | 1.05700402  | 0.02570533  | 2.12718994  |
| C | 2.74659324  | -2.01903394 | -0.08284674 |
| H | 2.85339154  | -2.16155030 | -1.14961793 |
| H | 3.73649934  | -1.91945036 | 0.34208758  |
| H | 2.31254113  | -2.92451103 | 0.32532620  |
| C | 3.08996704  | 0.47952362  | -1.61472125 |
| H | 3.37919458  | 1.47250399  | -1.93652537 |
| H | 3.97632965  | -0.13906906 | -1.64171086 |
| H | 2.38662737  | 0.09767446  | -2.34309536 |
| C | 3.62308758  | 1.00836681  | 0.75154177  |
| H | 4.39246937  | 0.25412397  | 0.84915019  |
| H | 4.09273902  | 1.89811144  | 0.34995869  |
| H | 3.25987387  | 1.25037041  | 1.74064815  |

**1c- $E_{\text{out}}$** 

|    |             |             |             |
|----|-------------|-------------|-------------|
| C  | -4.70881214 | -1.04745868 | 0.33701521  |
| C  | -3.31218597 | 0.72147808  | -0.29234157 |
| C  | -2.40970326 | -0.41861085 | -0.10420422 |
| C  | -3.29323932 | -1.62216355 | 0.21213996  |
| C  | -1.05893862 | -0.45533797 | -0.19681912 |
| C  | -0.35958546 | -1.73080239 | -0.02105262 |
| C  | -0.17171501 | 0.72706544  | -0.51733247 |
| C  | 0.97412674  | -1.84076599 | -0.00123005 |
| C  | 1.18089083  | 0.64604997  | 0.19629914  |
| H  | 0.01276865  | 0.75664372  | -1.58299214 |
| H  | -0.61141985 | 1.66109507  | -0.22880350 |
| C  | 1.90707446  | -0.67323909 | -0.17490735 |
| H  | -5.42856656 | -1.51037131 | -0.31922880 |
| H  | 1.44438807  | -2.79812713 | 0.09059848  |
| H  | -0.93712289 | -2.62467269 | 0.09135926  |
| H  | -2.99480756 | -2.10613461 | 1.12878066  |
| H  | -3.25058867 | -2.35463638 | -0.58125182 |
| H  | -5.09325161 | -1.06358425 | 1.34545105  |
| H  | -5.29097955 | 0.98571391  | -0.14613771 |
| C  | -3.02783860 | 2.13352763  | -0.69081974 |
| H  | -2.49690234 | 2.63906749  | 0.10427107  |
| H  | -2.42042873 | 2.16031669  | -1.58279757 |
| H  | -3.94863812 | 2.66618310  | -0.88023720 |
| N  | -4.52345589 | 0.35212540  | -0.06921827 |
| Cl | 2.13206501  | 2.07626991  | -0.22698814 |
| Cl | 2.38032680  | -0.64627794 | -1.90473087 |
| Cl | 0.86995538  | 0.69135413  | 1.95917284  |
| Cl | 3.36877021  | -0.92321067 | 0.78879648  |

**1c-Z<sub>in</sub>**

|    |             |             |             |
|----|-------------|-------------|-------------|
| C  | -4.47101991 | 1.33517290  | -0.43285887 |
| C  | -2.95031592 | 1.52348183  | -0.44615820 |
| C  | -2.38212138 | 0.12978773  | -0.19855599 |
| C  | -3.52585088 | -0.73539535 | 0.10972063  |
| H  | -4.98483180 | 1.97289255  | 0.26863590  |
| H  | -4.92788919 | 1.44367972  | -1.40481278 |
| H  | -2.62192322 | 1.93227749  | -1.38909303 |
| H  | -2.64692192 | 2.20610570  | 0.33509546  |
| C  | -1.06520757 | -0.18394561 | -0.24089865 |
| C  | -0.49554441 | -1.51821088 | -0.04881047 |
| C  | -0.06339586 | 0.90367527  | -0.56867511 |
| C  | 0.82332795  | -1.74621565 | -0.01261332 |
| C  | 1.26595393  | 0.71280801  | 0.16278134  |
| H  | 0.12952678  | 0.89945454  | -1.63368903 |
| H  | -0.43531746 | 1.87856121  | -0.30661400 |
| C  | 1.86658826  | -0.67519270 | -0.18163200 |
| H  | -5.50922640 | -0.47183205 | 0.17143517  |
| H  | 1.20113046  | -2.74293963 | 0.08810781  |
| C  | -3.57685917 | -2.16896902 | 0.52704017  |
| H  | -3.23752537 | -2.80063916 | -0.28224369 |
| H  | -2.93982674 | -2.33002646 | 1.38421306  |
| H  | -4.58683056 | -2.45384712 | 0.78427331  |
| H  | -1.13775645 | -2.36364912 | 0.05029322  |
| N  | -4.61566323 | -0.06268754 | -0.00348353 |
| Cl | 2.35412918  | 2.03922879  | -0.26186828 |
| Cl | 0.93737225  | 0.80729353  | 1.92172146  |
| Cl | 3.28274642  | -1.05613842 | 0.80706255  |
| Cl | 2.36458322  | -0.71986054 | -1.90399614 |

**1c- $E_{in}$** 

|    |             |             |             |
|----|-------------|-------------|-------------|
| C  | 4.70888653  | -1.04740180 | 0.33703385  |
| C  | 3.31221750  | 0.72151344  | -0.29228210 |
| C  | 2.40974128  | -0.41855937 | -0.10398312 |
| C  | 3.29330180  | -1.62210675 | 0.21230675  |
| C  | 1.05896811  | -0.45526655 | -0.19646662 |
| C  | 0.35961870  | -1.73072890 | -0.02068958 |
| C  | 0.17177747  | 0.72716422  | -0.51696684 |
| C  | -0.97409005 | -1.84072358 | -0.00105089 |
| C  | -1.18095067 | 0.64606258  | 0.19642220  |
| H  | 0.61140546  | 1.66116179  | -0.22820483 |
| H  | -0.01258946 | 0.75693893  | -1.58264045 |
| C  | -1.90702907 | -0.67321922 | -0.17494352 |
| H  | 5.09339541  | -1.06344182 | 1.34544497  |
| H  | -1.44434673 | -2.79808810 | 0.09076432  |
| H  | 0.93716381  | -2.62457882 | 0.09184495  |
| H  | 3.25057187  | -2.35458769 | -0.58107438 |
| H  | 2.99495574  | -2.10606723 | 1.12898022  |
| H  | 5.42859103  | -1.51037781 | -0.31921930 |
| H  | 5.29104397  | 0.98570469  | -0.14642114 |
| C  | 3.02784879  | 2.13349826  | -0.69097663 |
| H  | 2.42026204  | 2.16013095  | -1.58283676 |
| H  | 2.49708779  | 2.63922415  | 0.10411346  |
| H  | 3.94863259  | 2.66607828  | -0.88068262 |
| N  | 4.52351145  | 0.35215016  | -0.06931470 |
| Cl | -0.87024766 | 0.69127452  | 1.95934689  |
| Cl | -2.13208962 | 2.07626267  | -0.22700523 |
| Cl | -3.36894687 | -0.92325416 | 0.78842785  |
| Cl | -2.37985222 | -0.64629584 | -1.90487874 |



**1c-Z<sub>out</sub>**

|    |             |             |             |
|----|-------------|-------------|-------------|
| C  | 4.47125797  | 1.33393096  | -0.43676248 |
| C  | 3.52550118  | -0.73465938 | 0.11160775  |
| C  | 2.38218656  | 0.13034068  | -0.19776121 |
| C  | 2.95070720  | 1.52396912  | -0.44493904 |
| C  | 1.06544923  | -0.18381072 | -0.24230951 |
| C  | 0.49598672  | -1.51871550 | -0.05384357 |
| C  | 0.06327566  | 0.90371361  | -0.56871419 |
| C  | -0.82291595 | -1.74664994 | -0.01727223 |
| C  | -1.26520021 | 0.71193673  | 0.16420626  |
| H  | 0.43519903  | 1.87866141  | -0.30689928 |
| H  | -0.13090823 | 0.89958220  | -1.63349988 |
| C  | -1.86639478 | -0.67512191 | -0.18186497 |
| H  | 4.92433446  | 1.43837200  | -1.41096510 |
| H  | -1.20075179 | -2.74381190 | 0.07871667  |
| H  | 1.13819068  | -2.36460663 | 0.04146741  |
| H  | 2.65054613  | 2.20541647  | 0.33865397  |
| H  | 2.61976415  | 1.93482672  | -1.38604301 |
| H  | 4.98865368  | 1.97353287  | 0.26033716  |
| H  | 5.50904484  | -0.47166924 | 0.17253653  |
| C  | 3.57573638  | -2.16713159 | 0.53270225  |
| H  | 2.93574659  | -2.32647462 | 1.38797487  |
| H  | 3.23965371  | -2.80103456 | -0.27620993 |
| H  | 4.58497463  | -2.45087489 | 0.79406216  |
| N  | 4.61561454  | -0.06260243 | -0.00329110 |
| Cl | -3.28017069 | -1.05872896 | 0.80947519  |
| Cl | -2.36850500 | -0.71519925 | -1.90295292 |
| Cl | -2.35404892 | 2.03883049  | -0.25688716 |
| Cl | -0.93425877 | 0.80284827  | 1.92285138  |

**1d- $E_{out}$** 

|    |             |             |             |
|----|-------------|-------------|-------------|
| C  | 5.44070177  | -1.01868737 | -0.67180483 |
| C  | 4.04382809  | 0.30209759  | 0.65186482  |
| C  | 3.13654186  | -0.60693580 | -0.04804391 |
| C  | 4.01600210  | -1.55359417 | -0.85916618 |
| C  | 1.78175179  | -0.64655188 | -0.01048215 |
| C  | 1.07461115  | -1.68645705 | -0.75924682 |
| C  | 0.89976087  | 0.28237856  | 0.79517760  |
| C  | -0.26050299 | -1.74897821 | -0.84707157 |
| C  | -0.44279068 | 0.55976255  | 0.10636901  |
| H  | 0.69650584  | -0.17366565 | 1.75550726  |
| H  | 1.36130213  | 1.23291940  | 0.96987641  |
| C  | -1.18267639 | -0.76608839 | -0.18801924 |
| H  | 6.12903403  | -1.75046026 | -0.27923186 |
| H  | -0.73053534 | -2.55755289 | -1.36780385 |
| H  | 1.64512433  | -2.44454981 | -1.25398067 |
| H  | 3.73975768  | -1.55602928 | -1.90200113 |
| H  | 3.93776744  | -2.56667577 | -0.49114210 |
| H  | 5.85918376  | -0.59509486 | -1.57229140 |
| H  | 6.02197814  | 0.56051916  | 0.68992242  |
| C  | 3.76079801  | 1.38608037  | 1.63616603  |
| H  | 3.25884392  | 2.20425755  | 1.13656984  |
| H  | 3.12168989  | 1.02199898  | 2.42638919  |
| H  | 4.67946993  | 1.75610948  | 2.06654939  |
| N  | 5.25334547  | 0.04909368  | 0.31536430  |
| Br | -1.46016528 | 1.77353699  | 1.22205375  |
| Br | -0.04268456 | 1.50117301  | -1.57255910 |
| Br | -2.78445642 | -0.54047350 | -1.24591751 |
| Br | -1.73652259 | -1.66533544 | 1.53902630  |

**1d-Z<sub>in</sub>**

|    |             |             |             |
|----|-------------|-------------|-------------|
| C  | -5.21996319 | 0.83192500  | -1.04571578 |
| C  | -3.70091246 | 1.02274816  | -1.11211416 |
| C  | -3.12620580 | -0.12955283 | -0.29467359 |
| C  | -4.26852747 | -0.81090135 | 0.32192062  |
| H  | -5.75336393 | 1.69395209  | -0.67793868 |
| H  | -5.65762433 | 0.52271106  | -1.98273055 |
| H  | -3.35574848 | 1.00452752  | -2.13426878 |
| H  | -3.42018747 | 1.97483195  | -0.68424345 |
| C  | -1.80521667 | -0.40397400 | -0.17306099 |
| C  | -1.22677792 | -1.52363256 | 0.56752454  |
| C  | -0.80791784 | 0.47041646  | -0.90572074 |
| C  | 0.09440508  | -1.69423551 | 0.71161664  |
| C  | 0.51466370  | 0.61992220  | -0.14705095 |
| H  | -0.59984825 | 0.03056660  | -1.87300746 |
| H  | -1.19979429 | 1.45740695  | -1.07470202 |
| C  | 1.13086775  | -0.77402690 | 0.12971345  |
| H  | -6.25536999 | -0.58294453 | 0.23265425  |
| H  | 0.47297356  | -2.55602171 | 1.22119205  |
| C  | -4.31610875 | -1.94356177 | 1.29483121  |
| H  | -3.94334498 | -2.84539093 | 0.82935003  |
| H  | -3.70476975 | -1.71910489 | 2.15651877  |
| H  | -5.33032732 | -2.12040068 | 1.62264535  |
| H  | -1.86124215 | -2.26190770 | 1.00269761  |
| N  | -5.36191023 | -0.26621085 | -0.07979712 |
| Br | 0.10219611  | 1.52948460  | 1.54807636  |
| Br | 1.68240026  | 1.78677338  | -1.15948563 |
| Br | 2.67521044  | -0.70989911 | 1.29870387  |
| Br | 1.70161240  | -1.63355867 | -1.54801086 |

**1d- $E_{in}$** 

|    |             |             |             |
|----|-------------|-------------|-------------|
| C  | -5.44068344 | -1.01871346 | -0.67181396 |
| C  | -4.04379802 | 0.30199901  | 0.65187235  |
| C  | -3.13655743 | -0.60691149 | -0.04799257 |
| C  | -4.01595442 | -1.55362139 | -0.85917441 |
| C  | -1.78173883 | -0.64647814 | -0.01040092 |
| C  | -1.07462298 | -1.68629300 | -0.75920982 |
| C  | -0.89969191 | 0.28236457  | 0.79514718  |
| C  | 0.26046189  | -1.74883611 | -0.84719090 |
| C  | 0.44281271  | 0.55977882  | 0.10636533  |
| H  | -0.69642852 | -0.17353500 | 1.75560161  |
| H  | -1.36117476 | 1.23294927  | 0.96991973  |
| C  | 1.18261909  | -0.76616807 | -0.18785534 |
| H  | -6.12899170 | -1.75053740 | -0.27929029 |
| H  | 0.73035726  | -2.55735152 | -1.36812251 |
| H  | -1.64521718 | -2.44432213 | -1.25393902 |
| H  | -3.73967393 | -1.55607808 | -1.90199850 |
| H  | -3.93771453 | -2.56669181 | -0.49111885 |
| H  | -5.85915032 | -0.59512320 | -1.57231169 |
| H  | -6.02196485 | 0.56044571  | 0.68995070  |
| C  | -3.76085915 | 1.38605134  | 1.63619549  |
| H  | -3.25873048 | 2.20418403  | 1.13670435  |
| H  | -3.12198534 | 1.02202237  | 2.42664858  |
| H  | -4.67962837 | 1.75617045  | 2.06629468  |
| N  | -5.25334887 | 0.04901566  | 0.31537355  |
| Br | 1.46035456  | 1.77363239  | 1.22179688  |
| Br | 0.04275365  | 1.50101180  | -1.57259578 |
| Br | 2.78452598  | -0.54076130 | -1.24594817 |
| Br | 1.73636687  | -1.66540633 | 1.53916531  |

**1d-Z<sub>out</sub>**

|    |             |             |             |
|----|-------------|-------------|-------------|
| C  | 5.22020941  | 0.83218097  | -1.04535181 |
| C  | 4.26841650  | -0.81069688 | 0.32201827  |
| C  | 3.12627436  | -0.12951079 | -0.29496716 |
| C  | 3.70110523  | 1.02266133  | -1.11253654 |
| C  | 1.80529248  | -0.40407736 | -0.17374537 |
| C  | 1.22650263  | -1.52294705 | 0.56804781  |
| C  | 0.80748705  | 0.47064453  | -0.90572801 |
| C  | -0.09451592 | -1.69364388 | 0.71256485  |
| C  | -0.51491544 | 0.62016265  | -0.14702590 |
| H  | 1.19971325  | 1.45730933  | -1.07573801 |
| H  | 0.59930414  | 0.03010282  | -1.87269426 |
| C  | -1.13086814 | -0.77400238 | 0.12956320  |
| H  | 5.65842488  | 0.52310790  | -1.98215727 |
| H  | -0.47257577 | -2.55531977 | 1.22281310  |
| H  | 1.86076945  | -2.26075765 | 1.00427252  |
| H  | 3.41993348  | 1.97484790  | -0.68521166 |
| H  | 3.35645386  | 1.00381315  | -2.13485889 |
| H  | 5.75325202  | 1.69428791  | -0.67722815 |
| H  | 6.25535053  | -0.58271165 | 0.23317046  |
| C  | 4.31583429  | -1.94403188 | 1.29412248  |
| H  | 3.70384177  | -1.72074290 | 2.15561494  |
| H  | 3.94379113  | -2.84557649 | 0.82745955  |
| H  | 5.32991514  | -2.12068195 | 1.62248684  |
| N  | 5.36191512  | -0.26603278 | -0.07945447 |
| Br | -1.68284767 | 1.78716054  | -1.15829211 |
| Br | -0.10156865 | 1.52938716  | 1.54816724  |
| Br | -2.67571081 | -0.71057776 | 1.29778530  |
| Br | -1.69995033 | -1.63441102 | -1.54817298 |

**2a- $E_{out}$** 

|   |             |             |             |
|---|-------------|-------------|-------------|
| C | -3.23064278 | -1.79731671 | 0.25078070  |
| C | -2.62240779 | 0.43121229  | -0.10486473 |
| C | -1.35629595 | -0.28160066 | -0.00313430 |
| C | -1.70409367 | -1.76389027 | 0.11337106  |
| C | -0.09207091 | 0.21870794  | -0.04201510 |
| C | 1.03479717  | -0.70786126 | -0.03352637 |
| C | 0.26921926  | 1.68449427  | -0.14349808 |
| C | 2.33419638  | -0.32928011 | -0.03126917 |
| C | 1.58095525  | 1.98174167  | 0.57712389  |
| H | 0.37177270  | 1.93693418  | -1.19585822 |
| H | -0.50275570 | 2.31371188  | 0.26375690  |
| C | 2.72104552  | 1.12492218  | 0.04796495  |
| H | 1.82003621  | 3.03131645  | 0.46613961  |
| H | 1.45340028  | 1.79687423  | 1.63870640  |
| H | 3.58534992  | 1.23783175  | 0.68753804  |
| H | 3.02245155  | 1.46330157  | -0.93961050 |
| H | -3.72179289 | -2.42413584 | -0.47660341 |
| H | 0.81910959  | -1.75643514 | -0.07771261 |
| H | -1.23235735 | -2.22163117 | 0.96871758  |
| H | -1.39204386 | -2.30757088 | -0.76732254 |
| H | -3.56750794 | -2.07803813 | 1.23741340  |
| C | -2.91092035 | 1.88015020  | -0.33363270 |
| H | -2.64421078 | 2.45138054  | 0.54459030  |
| H | -2.33931022 | 2.25160314  | -1.16984884 |
| H | -3.96245476 | 2.02950437  | -0.53353682 |
| N | -3.60292993 | -0.39803014 | 0.00901052  |
| C | 3.37324754  | -1.35950142 | -0.13008789 |
| H | 3.02166003  | -2.37541733 | -0.15341887 |
| C | 4.69217602  | -1.13872314 | -0.21425597 |
| H | 5.12110107  | -0.15620026 | -0.20879770 |
| H | 5.37650244  | -1.95972231 | -0.29878473 |
| H | -4.55407706 | -0.10273192 | -0.03999780 |

**2a-Z<sub>in</sub>**

|   |             |             |             |
|---|-------------|-------------|-------------|
| C | 3.86521829  | -0.54187063 | -0.23988254 |
| C | 2.54554481  | -1.31432746 | -0.13416386 |
| C | 1.47028620  | -0.23476717 | -0.04074221 |
| C | 2.17456203  | 1.03348579  | 0.10786564  |
| H | 4.60400637  | -0.83438772 | 0.48925134  |
| H | 4.30954026  | -0.58323272 | -1.22316258 |
| H | 2.40470685  | -1.95359390 | -0.99156530 |
| H | 2.54535931  | -1.94058517 | 0.74716776  |
| C | 0.13220196  | -0.47386623 | -0.07744812 |
| C | -0.90744059 | 0.54917679  | -0.07677695 |
| C | -0.36319741 | -1.89858004 | -0.19757846 |
| C | -2.23309301 | 0.27656378  | -0.04787000 |
| C | -1.67368124 | -2.09634962 | 0.55514183  |
| H | -0.51256109 | -2.11232148 | -1.25336126 |
| H | 0.37590461  | -2.59770811 | 0.16300836  |
| C | -2.74674019 | -1.13592875 | 0.06386888  |
| H | -2.00708552 | -3.11912281 | 0.43936862  |
| H | -1.50320189 | -1.93816529 | 1.61514994  |
| H | -3.59367512 | -1.16198718 | 0.73559509  |
| H | -3.11613482 | -1.44866709 | -0.90888144 |
| C | 1.65629346  | 2.41357046  | 0.35241697  |
| H | 1.13752279  | 2.77178852  | -0.52599897 |
| H | 0.96694820  | 2.41283956  | 1.18307327  |
| H | 2.46940131  | 3.09098965  | 0.57113890  |
| H | -0.62262556 | 1.57477496  | -0.15935821 |
| N | 3.44613440  | 0.83992545  | 0.02586038  |
| C | -3.18424652 | 1.38884304  | -0.15648227 |
| H | -2.75011972 | 2.37141257  | -0.21112627 |
| C | -4.51827811 | 1.27956696  | -0.21411474 |
| H | -5.02867770 | 0.33760767  | -0.17718606 |
| H | -5.13187110 | 2.15370495  | -0.30845348 |
| H | 4.10154273  | 1.58694619  | 0.10868571  |

**2a- $E_{in}$** 

|   |             |             |             |
|---|-------------|-------------|-------------|
| C | 3.23160527  | -1.79836866 | 0.24372519  |
| C | 2.62222538  | 0.43108189  | -0.10477938 |
| C | 1.35627025  | -0.28192684 | 0.00020047  |
| C | 1.70431008  | -1.76432094 | 0.11482874  |
| C | 0.09194937  | 0.21842252  | -0.03672850 |
| C | -1.03492247 | -0.70814959 | -0.02557656 |
| C | -0.26865276 | 1.68429660  | -0.14071631 |
| C | -2.33432599 | -0.32960222 | -0.02677937 |
| C | -1.58272846 | 1.98391483  | 0.57462000  |
| H | 0.50224961  | 2.31317469  | 0.26929282  |
| H | -0.36659047 | 1.93602078  | -1.19375186 |
| C | -2.72148808 | 1.12482082  | 0.04615281  |
| H | -3.02135346 | 1.45958361  | -0.94319274 |
| H | -3.58699223 | 1.23964364  | 0.68392692  |
| H | 3.57395096  | -2.08260400 | 1.22748366  |
| H | -0.81904362 | -1.75691963 | -0.06471076 |
| H | 1.38707437  | -2.30796560 | -0.76402954 |
| H | 1.23714968  | -2.22188729 | 0.97283803  |
| H | 3.71851867  | -2.42286160 | -0.48855812 |
| C | 2.91035657  | 1.88057516  | -0.33041601 |
| H | 2.33850410  | 2.25401061  | -1.16562104 |
| H | 2.64364778  | 2.44963439  | 0.54923057  |
| H | 3.96183118  | 2.03067606  | -0.53009539 |
| H | -1.82167543 | 3.03300099  | 0.45860871  |
| H | -1.45820084 | 1.80359452  | 1.63737350  |
| N | 3.60306456  | -0.39841030 | 0.00462986  |
| C | -3.37328267 | -1.36003667 | -0.12436096 |
| H | -3.02210982 | -2.37629892 | -0.13954518 |
| C | -4.69140556 | -1.13875710 | -0.21941873 |
| H | -5.11937192 | -0.15575122 | -0.22472535 |
| H | -5.37580327 | -1.95968078 | -0.30427217 |
| H | 4.55408922  | -0.10330978 | -0.04829930 |



**2a-Z<sub>out</sub>**

|   |             |             |             |
|---|-------------|-------------|-------------|
| C | -3.86534294 | -0.54199896 | -0.23888504 |
| C | -2.17449340 | 1.03347687  | 0.10753672  |
| C | -1.47028289 | -0.23480062 | -0.04112120 |
| C | -2.54555246 | -1.31439359 | -0.13411480 |
| C | -0.13220151 | -0.47388839 | -0.07807983 |
| C | 0.90743902  | 0.54917693  | -0.07721628 |
| C | 0.36333229  | -1.89853995 | -0.19838199 |
| C | 2.23306893  | 0.27657917  | -0.04789037 |
| C | 1.67343834  | -2.09625741 | 0.55501916  |
| H | -0.37589589 | -2.59787445 | 0.16153176  |
| H | 0.51334840  | -2.11190227 | -1.25415015 |
| C | 2.74668141  | -1.13592410 | 0.06398806  |
| H | 3.11625096  | -1.44870065 | -0.90868526 |
| H | 3.59347149  | -1.16199705 | 0.73589467  |
| H | -4.31056903 | -0.58363293 | -1.22174660 |
| H | 0.62264096  | 1.57476712  | -0.15981911 |
| H | -2.54478372 | -1.94082570 | 0.74708816  |
| H | -2.40519667 | -1.95350107 | -0.99171481 |
| H | -4.60346152 | -0.83437447 | 0.49099385  |
| C | -1.65614341 | 2.41358755  | 0.35177507  |
| H | -0.96719534 | 2.41301277  | 1.18277725  |
| H | -1.13689823 | 2.77149042  | -0.52647488 |
| H | -2.46925294 | 3.09118746  | 0.56991189  |
| H | 2.00688910  | -3.11905997 | 0.43965466  |
| H | 1.50245299  | -1.93778619 | 1.61490628  |
| N | -3.44611272 | 0.83987520  | 0.02621473  |
| C | 3.18426942  | 1.38886842  | -0.15613370 |
| H | 2.75017459  | 2.37146375  | -0.21048625 |
| C | 4.51828942  | 1.27954665  | -0.21354282 |
| H | 5.02862433  | 0.33754356  | -0.17685522 |
| H | 5.13194839  | 2.15367501  | -0.30753496 |
| H | -4.10148137 | 1.58694187  | 0.10898100  |

**2b- $E_{out}$** 

|   |             |             |             |
|---|-------------|-------------|-------------|
| C | 4.18316834  | 1.52328906  | 0.40919638  |
| C | 3.19946988  | -0.49015280 | -0.23351589 |
| C | 2.07998885  | 0.41128822  | -0.04000538 |
| C | 2.67883900  | 1.78270974  | 0.26155669  |
| C | 0.74794764  | 0.14494310  | -0.14044846 |
| C | -0.20053928 | 1.23591197  | -0.02024685 |
| C | 0.12983408  | -1.19678451 | -0.42245218 |
| C | -1.54854767 | 1.09821376  | -0.04708530 |
| C | -1.22055474 | -1.39835046 | 0.29277127  |
| H | -0.00475399 | -1.28116327 | -1.49518378 |
| H | 0.77673303  | -2.00307703 | -0.12432471 |
| C | -2.23870557 | -0.27147081 | -0.12293481 |
| H | 4.79359016  | 2.14758468  | -0.22420577 |
| H | 0.19710078  | 2.22710475  | 0.05431484  |
| H | 2.27043600  | 2.21024291  | 1.16387564  |
| H | 2.49016141  | 2.47495213  | -0.54730027 |
| H | 4.53215611  | 1.61571971  | 1.42715368  |
| C | 3.23206141  | -1.92300750 | -0.64853721 |
| H | 2.85564366  | -2.54072763 | 0.15554806  |
| H | 2.61126236  | -2.07919006 | -1.51693968 |
| H | 4.24331212  | -2.22816065 | -0.87422934 |
| N | 4.30658901  | 0.12667786  | -0.01491765 |
| C | -2.29128878 | 2.40736928  | -0.01700565 |
| H | -1.66713817 | 3.23424462  | 0.27071976  |
| C | -3.55598242 | 2.70284637  | -0.34669273 |
| H | -4.27886381 | 1.99023219  | -0.68018145 |
| H | -3.88687166 | 3.72178504  | -0.29448292 |
| C | -3.45839112 | -0.30692528 | 0.82228035  |
| H | -3.23384434 | 0.10642405  | 1.79540892  |
| H | -4.28859733 | 0.24743435  | 0.41919797  |
| H | -3.80116267 | -1.32196804 | 0.96085468  |
| C | -2.74003559 | -0.47584198 | -1.56937073 |
| H | -3.37587260 | -1.34734596 | -1.63843524 |
| H | -3.32047455 | 0.37385397  | -1.89518572 |
| H | -1.92911142 | -0.59262466 | -2.27655957 |
| C | -1.70903399 | -2.80295611 | -0.09807244 |
| H | -1.75770025 | -2.93889952 | -1.16978688 |
| H | -1.02461159 | -3.54721215 | 0.29301442  |
| H | -2.68402860 | -3.02594486 | 0.31073232  |
| C | -0.96706487 | -1.40458882 | 1.81328093  |
| H | -1.83345083 | -1.75250722 | 2.35609959  |
| H | -0.15414279 | -2.08288052 | 2.04881001  |
| H | -0.70693206 | -0.42880772 | 2.20169096  |
| H | 5.18930883  | -0.32376924 | -0.10598984 |

**2b-Z<sub>in</sub>**

|   |             |             |             |
|---|-------------|-------------|-------------|
| C | 4.41123161  | -0.91561115 | -0.37027362 |
| C | 2.96177853  | -1.41453974 | -0.35477174 |
| C | 2.12105944  | -0.16040278 | -0.12948434 |
| C | 3.05977830  | 0.91790770  | 0.15253006  |
| H | 5.05775898  | -1.42628716 | 0.32570510  |
| H | 4.86404112  | -0.94110315 | -1.35019016 |
| H | 2.71469704  | -1.90597360 | -1.28281614 |
| H | 2.81720565  | -2.12845634 | 0.44400595  |
| C | 0.76275184  | -0.12458680 | -0.18423805 |
| C | -0.05695579 | 1.06614318  | -0.05215696 |
| C | -0.00668459 | -1.38444588 | -0.47496990 |
| C | -1.41221901 | 1.07270153  | -0.05544666 |
| C | -1.35806195 | -1.45223831 | 0.25712591  |
| H | -0.15949543 | -1.43452259 | -1.54775802 |
| H | 0.56987381  | -2.25777317 | -0.20872948 |
| C | -2.24988407 | -0.21436404 | -0.13277415 |
| C | 2.82249932  | 2.33991914  | 0.54592485  |
| H | 2.38319196  | 2.88135851  | -0.28031054 |
| H | 2.14695161  | 2.38737403  | 1.38661223  |
| H | 3.75263379  | 2.81946167  | 0.81576710  |
| H | 0.42902197  | 2.01408421  | 0.00746363  |
| N | 4.26940359  | 0.48573490  | 0.04329272  |
| C | -2.01027546 | 2.42956907  | 0.00291052  |
| H | -1.31685682 | 3.18201273  | 0.33518830  |
| C | -3.22633722 | 2.86955701  | -0.34484609 |
| H | -4.01175485 | 2.25015381  | -0.72060077 |
| H | -3.44902229 | 3.91559387  | -0.26220684 |
| C | -3.45450005 | -0.12360261 | 0.82764573  |
| H | -3.17216936 | 0.24426825  | 1.80408814  |
| H | -4.21974704 | 0.53017285  | 0.44503505  |
| H | -3.90976363 | -1.09491683 | 0.95508264  |
| C | -2.78850306 | -0.35035809 | -1.57431033 |
| H | -3.52020712 | -1.14345821 | -1.63814929 |
| H | -3.27216258 | 0.56060150  | -1.89152497 |
| H | -2.00474154 | -0.55651179 | -2.29120268 |
| C | -1.08661723 | -1.50363108 | 1.77370523  |
| H | -1.97810606 | -1.76184274 | 2.32619606  |
| H | -0.34821035 | -2.26782308 | 1.98926530  |
| H | -0.71751329 | -0.56562809 | 2.16783633  |
| C | -2.00309355 | -2.79021104 | -0.13984833 |
| H | -2.08021528 | -2.90821275 | -1.21190854 |
| H | -1.39741561 | -3.60799743 | 0.23308778  |
| H | -2.99098900 | -2.91036197 | 0.28156131  |
| H | 5.05802270  | 1.07476144  | 0.20252067  |

**2b- $E_{in}$** 

|   |             |             |             |
|---|-------------|-------------|-------------|
| C | -4.18930629 | 1.49955209  | 0.43016414  |
| C | -3.19632099 | -0.51042536 | -0.20949961 |
| C | -2.08118678 | 0.39781977  | -0.02277087 |
| C | -2.68638033 | 1.76614229  | 0.28041066  |
| C | -0.74815315 | 0.13924644  | -0.13075330 |
| C | 0.19436537  | 1.23589867  | -0.01555809 |
| C | -0.12471798 | -1.19929540 | -0.41711155 |
| C | 1.54285737  | 1.10743523  | -0.05772917 |
| C | 1.23603987  | -1.39147906 | 0.28082285  |
| H | -0.76296427 | -2.00850108 | -0.10822986 |
| H | -0.00379757 | -1.28620947 | -1.49126461 |
| C | 2.24089750  | -0.25731339 | -0.14718300 |
| H | -4.53827832 | 1.59453425  | 1.44786101  |
| H | -0.20897336 | 2.22412430  | 0.06703420  |
| H | -2.50210127 | 2.45988910  | -0.52810364 |
| H | -2.27872414 | 2.19494215  | 1.18250716  |
| H | -4.80320446 | 2.11810838  | -0.20554581 |
| C | -3.22240294 | -1.94442262 | -0.62099767 |
| H | -2.60696389 | -2.09804230 | -1.49371534 |
| H | -2.83580058 | -2.55805464 | 0.18133441  |
| H | -4.23318655 | -2.25685637 | -0.83868132 |
| N | -4.30609145 | 0.10070684  | 0.01172384  |
| C | 2.27713330  | 2.42169219  | -0.03237049 |
| H | 1.65142386  | 3.24310475  | 0.26752944  |
| C | 3.53441520  | 2.72667795  | -0.38108457 |
| H | 4.25580026  | 2.01975150  | -0.72961019 |
| H | 3.85953873  | 3.74760116  | -0.33154511 |
| H | -5.18656241 | -0.35502141 | -0.07484835 |
| C | 3.47484682  | -0.28713753 | 0.77954092  |
| H | 4.29530812  | 0.27356710  | 0.36537889  |
| H | 3.26228810  | 0.12246124  | 1.75694583  |
| H | 3.82620983  | -1.30023480 | 0.91045217  |
| C | 2.72168852  | -0.45518641 | -1.60148201 |
| H | 3.29152613  | 0.39898900  | -1.93428910 |
| H | 3.36210482  | -1.32234215 | -1.68206453 |
| H | 1.90096468  | -0.57587889 | -2.29659167 |
| C | 1.72922313  | -2.79257763 | -0.11686506 |
| H | 1.05375986  | -3.54150122 | 0.28083469  |
| H | 1.76726597  | -2.92732528 | -1.18915184 |
| H | 2.70985482  | -3.00982331 | 0.28136119  |
| C | 1.00187297  | -1.40053514 | 1.80444387  |
| H | 0.19776365  | -2.08584095 | 2.04965372  |
| H | 1.87795860  | -1.74145771 | 2.33605283  |
| H | 0.73832425  | -0.42726821 | 2.19679194  |

**2b-Z<sub>out</sub>**

|   |             |             |             |
|---|-------------|-------------|-------------|
| C | -4.41043961 | -0.91370878 | -0.38169655 |
| C | -3.06108735 | 0.91834342  | 0.15118332  |
| C | -2.12137335 | -0.16050815 | -0.12639132 |
| C | -2.96182755 | -1.41424655 | -0.35488898 |
| C | -0.76304178 | -0.12483034 | -0.17827644 |
| C | 0.05692419  | 1.06566688  | -0.04535719 |
| C | 0.00594431  | -1.38542790 | -0.46741833 |
| C | 1.41212846  | 1.07234262  | -0.05180564 |
| C | 1.35942743  | -1.45218842 | 0.26072618  |
| H | -0.57009864 | -2.25815444 | -0.19806543 |
| H | 0.15607470  | -1.43808090 | -1.54043946 |
| C | 2.24960464  | -0.21467044 | -0.13367766 |
| H | -4.85442714 | -0.93619922 | -1.36573340 |
| H | -0.42905605 | 2.01345634  | 0.01741330  |
| H | -2.82370199 | -2.12641040 | 0.44667156  |
| H | -2.70886760 | -1.90822190 | -1.27997917 |
| H | -5.06383652 | -1.42522241 | 0.30717833  |
| C | -2.82470519 | 2.33963744  | 0.54756237  |
| H | -2.15238059 | 2.38542447  | 1.39093479  |
| H | -2.38181571 | 2.88194247  | -0.27622201 |
| H | -3.75561168 | 2.81938391  | 0.81432552  |
| N | -4.27029923 | 0.48673804  | 0.03596243  |
| C | 2.01038121  | 2.42890464  | 0.00738902  |
| H | 1.31770268  | 3.18115266  | 0.34164004  |
| C | 3.22551176  | 2.86904390  | -0.34278442 |
| H | 4.01008066  | 2.25003654  | -0.72094562 |
| H | 3.44868095  | 3.91490661  | -0.25905207 |
| C | 3.45934002  | -0.12448120 | 0.82033176  |
| H | 4.22516604  | 0.52475956  | 0.43127020  |
| H | 3.18322252  | 0.24824811  | 1.79670317  |
| H | 3.91170109  | -1.09687004 | 0.94947082  |
| C | 2.78053841  | -0.35024080 | -1.57813822 |
| H | 3.26054498  | 0.56169713  | -1.89833089 |
| H | 3.51345271  | -1.14196509 | -1.64562438 |
| H | 1.99337224  | -0.55819311 | -2.29071069 |
| C | 1.09319485  | -1.50220240 | 1.77822269  |
| H | 0.35779023  | -2.26830979 | 1.99708305  |
| H | 1.98731391  | -1.75712029 | 2.32797075  |
| H | 0.72258051  | -0.56482397 | 2.17236613  |
| C | 2.00319731  | -2.79060060 | -0.13722471 |
| H | 1.39854946  | -3.60797163 | 0.23828773  |
| H | 2.07683427  | -2.90946963 | -1.20944703 |
| H | 2.99240519  | -2.91071014 | 0.28105682  |
| H | -5.05949374 | 1.07565881  | 0.19249260  |

**2c- $E_{out}$** 

|    |             |             |             |
|----|-------------|-------------|-------------|
| C  | 4.74830480  | 1.38967642  | 0.35759385  |
| C  | 3.59692300  | -0.52569347 | -0.33386933 |
| C  | 2.55137788  | 0.46825713  | -0.08678692 |
| C  | 3.26540384  | 1.76837974  | 0.27093013  |
| C  | 1.20540345  | 0.31865798  | -0.16467316 |
| C  | 0.34319967  | 1.47215780  | 0.05468727  |
| C  | 0.49341902  | -0.96271333 | -0.51718966 |
| C  | -1.00862469 | 1.46227102  | 0.05476272  |
| C  | -0.84972670 | -1.06257014 | 0.20019445  |
| H  | 0.31193072  | -0.99632520 | -1.58304838 |
| H  | 1.05232155  | -1.83589653 | -0.24432776 |
| C  | -1.76225038 | 0.15224437  | -0.14468137 |
| H  | 5.38761627  | 1.97557293  | -0.28352525 |
| H  | 0.81556629  | 2.42292772  | 0.18813822  |
| H  | 2.91749884  | 2.16945927  | 1.20996932  |
| H  | 3.11042797  | 2.51960288  | -0.49046481 |
| H  | 5.14152064  | 1.41593747  | 1.36247250  |
| C  | 3.50281297  | -1.94522450 | -0.79251873 |
| H  | 3.06766441  | -2.55490973 | -0.01248685 |
| H  | 2.88335768  | -2.01847163 | -1.67341025 |
| H  | 4.48411456  | -2.33413798 | -1.02335123 |
| N  | 4.75098085  | -0.00325832 | -0.10878503 |
| C  | -1.69387359 | 2.76463577  | 0.16601607  |
| H  | -1.06469163 | 3.53882240  | 0.56495291  |
| C  | -2.92475449 | 3.10454747  | -0.23180995 |
| H  | -3.62174833 | 2.41960689  | -0.66567914 |
| H  | -3.25072573 | 4.12008646  | -0.12156585 |
| Cl | -3.24338181 | 0.06835300  | 0.82274338  |
| Cl | -0.52276728 | -1.09864680 | 1.96158565  |
| Cl | -1.60373412 | -2.60277684 | -0.24173863 |
| Cl | -2.21308946 | 0.07327962  | -1.88190669 |
| H  | 5.59647978  | -0.52105588 | -0.22263047 |

**2c-Z<sub>in</sub>**

|    |             |             |             |
|----|-------------|-------------|-------------|
| C  | 4.78339469  | -1.05211413 | -0.52059014 |
| C  | 3.29744872  | -1.42612144 | -0.51722152 |
| C  | 2.56877945  | -0.12232231 | -0.20767955 |
| C  | 3.60185366  | 0.85801641  | 0.13291534  |
| H  | 5.38851065  | -1.65634614 | 0.13625833  |
| H  | 5.22602339  | -1.05387617 | -1.50522485 |
| H  | 3.00281096  | -1.83932578 | -1.46933916 |
| H  | 3.09642606  | -2.16829635 | 0.24278420  |
| C  | 1.22083360  | 0.02821338  | -0.23024795 |
| C  | 0.50015930  | 1.27100757  | 0.00195297  |
| C  | 0.36099737  | -1.15998675 | -0.58537254 |
| C  | -0.84547047 | 1.40380762  | 0.02849908  |
| C  | -0.96756327 | -1.12596725 | 0.16028182  |
| H  | 0.16065339  | -1.15531644 | -1.64884000 |
| H  | 0.84318791  | -2.09119493 | -0.34499775 |
| C  | -1.74565491 | 0.18642886  | -0.15441529 |
| C  | 3.48553658  | 2.26483549  | 0.62236311  |
| H  | 3.07818907  | 2.89359406  | -0.15737034 |
| H  | 2.83126424  | 2.30762032  | 1.48047659  |
| H  | 4.45516479  | 2.65067077  | 0.90240128  |
| H  | 1.05959863  | 2.17183449  | 0.11202133  |
| N  | 4.76466370  | 0.32923750  | -0.02047022 |
| C  | -1.38295045 | 2.77398389  | 0.14952832  |
| H  | -0.66688335 | 3.47560446  | 0.53679014  |
| C  | -2.57698953 | 3.24724529  | -0.22313853 |
| H  | -3.35329133 | 2.64314691  | -0.64194085 |
| H  | -2.78786379 | 4.29210750  | -0.10646627 |
| Cl | -2.24702983 | 0.17199062  | -1.87935867 |
| Cl | -3.20164242 | 0.26610113  | 0.85119520  |
| Cl | -1.89781331 | -2.56766885 | -0.27144560 |
| Cl | -0.60658170 | -1.21048097 | 1.91476732  |
| H  | 5.60404920  | 0.83483523  | 0.16874920  |

**2c- $E_{in}$** 

|    |             |             |             |
|----|-------------|-------------|-------------|
| C  | -4.76631800 | 1.36834934  | 0.34970317  |
| C  | -3.60264695 | -0.53666169 | -0.32929086 |
| C  | -2.56361193 | 0.45786143  | -0.07858976 |
| C  | -3.28418663 | 1.75480780  | 0.27557808  |
| C  | -1.21577812 | 0.30878644  | -0.15125278 |
| C  | -0.35917217 | 1.46601509  | 0.06796703  |
| C  | -0.49912513 | -0.97100175 | -0.49906356 |
| C  | 0.99302652  | 1.46121952  | 0.06771809  |
| C  | 0.84638048  | -1.06398179 | 0.21498282  |
| H  | -1.05378668 | -1.84540388 | -0.22175022 |
| H  | -0.32050183 | -1.00687394 | -1.56545051 |
| C  | 1.74965314  | 0.15541858  | -0.12557635 |
| H  | -5.16600160 | 1.40266415  | 1.35202788  |
| H  | -0.83650286 | 2.41424114  | 0.20069508  |
| H  | -3.12434339 | 2.50725661  | -0.48366995 |
| H  | -2.94277635 | 2.15492747  | 1.21750995  |
| H  | -5.39878087 | 1.95581507  | -0.29702607 |
| C  | -3.49830391 | -1.95351302 | -0.78379874 |
| H  | -2.86504231 | -2.02650913 | -1.65491453 |
| H  | -3.06782095 | -2.55489263 | 0.00610696  |
| H  | -4.47507013 | -2.34701941 | -1.02290087 |
| N  | -4.75654975 | -0.02244986 | -0.11329167 |
| C  | 1.67205061  | 2.76674394  | 0.17793311  |
| H  | 1.04254905  | 3.53702966  | 0.58383967  |
| C  | 2.89804705  | 3.11233891  | -0.23015736 |
| H  | 3.59340520  | 2.43061784  | -0.67173182 |
| H  | 3.22123511  | 4.12888239  | -0.12104218 |
| H  | -5.59684250 | -0.54333955 | -0.23536379 |
| Cl | 3.24042967  | 0.07723495  | 0.82063527  |
| Cl | 2.19885756  | 0.07827128  | -1.90936924 |
| Cl | 1.60703726  | -2.59929081 | -0.23184158 |
| Cl | 0.52389240  | -1.10404517 | 1.97722175  |



**2c-Z<sub>out</sub>**

|    |             |             |             |
|----|-------------|-------------|-------------|
| C  | -4.78329229 | -1.05155981 | -0.52199877 |
| C  | -3.60170418 | 0.85791014  | 0.13325234  |
| C  | -2.56873379 | -0.12249340 | -0.20755603 |
| C  | -3.29755089 | -1.42627510 | -0.51665527 |
| C  | -1.22080927 | 0.02796400  | -0.23036882 |
| C  | -0.50019796 | 1.27096482  | 0.00123783  |
| C  | -0.36098217 | -1.16028453 | -0.58531616 |
| C  | 0.84537394  | 1.40389118  | 0.02790347  |
| C  | 0.96744583  | -1.12581734 | 0.16057135  |
| H  | -0.84316038 | -2.09141921 | -0.34467814 |
| H  | -0.16050332 | -1.15582636 | -1.64874355 |
| C  | 1.74551035  | 0.18647957  | -0.15478101 |
| H  | -5.22448414 | -1.05253275 | -1.50728169 |
| H  | -1.05978235 | 2.17175085  | 0.11073009  |
| H  | -3.09771932 | -2.16766129 | 0.24445442  |
| H  | -3.00207990 | -1.84072412 | -1.46795102 |
| H  | -5.38966903 | -1.65580829 | 0.13365743  |
| C  | -3.48522737 | 2.26423057  | 0.62406326  |
| H  | -2.83032578 | 2.30618310  | 1.48172488  |
| H  | -3.07857524 | 2.89391955  | -0.15527794 |
| H  | -4.45471045 | 2.64958944  | 0.90526100  |
| N  | -4.76456605 | 0.32952668  | -0.02102982 |
| C  | 1.38279540  | 2.77409033  | 0.14868196  |
| H  | 0.66634290  | 3.47590709  | 0.53480979  |
| C  | 2.57699660  | 3.24743449  | -0.22337223 |
| H  | 3.35393223  | 2.64346989  | -0.64114052 |
| H  | 2.78738001  | 4.29241004  | -0.10698435 |
| Cl | 0.60614442  | -1.20954772 | 1.91508015  |
| Cl | 1.89799669  | -2.56766524 | -0.27007494 |
| Cl | 3.20163866  | 0.26640270  | 0.85064252  |
| Cl | 2.24667702  | 0.17150285  | -1.87979414 |
| H  | -5.60397117 | 0.83525187  | 0.16779890  |

**2d- $E_{out}$** 

|    |             |             |             |
|----|-------------|-------------|-------------|
| C  | -5.44881101 | 1.33642802  | -0.35563358 |
| C  | -4.16643145 | -0.39120924 | 0.54732664  |
| C  | -3.18900303 | 0.60124317  | 0.11253160  |
| C  | -3.98585655 | 1.79369765  | -0.40704842 |
| C  | -1.83334607 | 0.52757405  | 0.15571636  |
| C  | -1.04572680 | 1.67430735  | -0.27005349 |
| C  | -1.04290079 | -0.64896020 | 0.66950354  |
| C  | 0.30529553  | 1.74242255  | -0.30242779 |
| C  | 0.29964755  | -0.77832765 | -0.05052569 |
| H  | -0.85118596 | -0.51411719 | 1.72598301  |
| H  | -1.55906058 | -1.57892765 | 0.54089511  |
| C  | 1.13608668  | 0.52582189  | 0.07389095  |
| H  | -6.08355891 | 1.98510048  | 0.22736448  |
| H  | -1.57725541 | 2.56179096  | -0.54242269 |
| H  | -3.69914985 | 2.05411935  | -1.41407733 |
| H  | -3.83612948 | 2.66305320  | 0.21731897  |
| H  | -5.88898590 | 1.20558635  | -1.33270370 |
| C  | -3.97500344 | -1.71859657 | 1.20028558  |
| H  | -3.53557421 | -2.40885449 | 0.49222139  |
| H  | -3.31448742 | -1.63147271 | 2.04961034  |
| H  | -4.92263528 | -2.11864319 | 1.52907550  |
| N  | -5.35211360 | 0.03113561  | 0.30397354  |
| C  | 0.89004091  | 3.05671887  | -0.64261351 |
| H  | 0.21307411  | 3.68717729  | -1.18903274 |
| C  | 2.07282748  | 3.57241933  | -0.29215916 |
| H  | 2.81040046  | 3.04564453  | 0.27475355  |
| H  | 2.31514666  | 4.57495420  | -0.58558829 |
| Br | 2.77927147  | 0.37533313  | -0.94396845 |
| Br | 1.64466965  | 0.80575047  | 2.01822697  |
| Br | 1.20700310  | -2.33884459 | 0.66237504  |
| Br | -0.09918484 | -1.15163373 | -1.94159423 |
| H  | -6.15984006 | -0.50399126 | 0.53496549  |

**2d-Z<sub>in</sub>**

|    |             |             |             |
|----|-------------|-------------|-------------|
| C  | -5.34697379 | -0.97000600 | 0.85942055  |
| C  | -3.84290335 | -1.26555050 | 0.85698493  |
| C  | -3.20000563 | 0.00737174  | 0.31712579  |
| C  | -4.29544161 | 0.86714412  | -0.12156566 |
| H  | -5.93233971 | -1.70220573 | 0.32614754  |
| H  | -5.75678927 | -0.85201409 | 1.85144295  |
| H  | -3.49364754 | -1.50475134 | 1.84959109  |
| H  | -3.62202583 | -2.10803901 | 0.21632310  |
| C  | -1.86144945 | 0.22876914  | 0.25340159  |
| C  | -1.21961246 | 1.45301387  | -0.19610807 |
| C  | -0.92888886 | -0.84704672 | 0.75342204  |
| C  | 0.11654736  | 1.65794659  | -0.27190560 |
| C  | 0.39355347  | -0.84782185 | -0.00879328 |
| H  | -0.72429828 | -0.67679739 | 1.80287251  |
| H  | -1.36653652 | -1.82505513 | 0.66159937  |
| C  | 1.08744041  | 0.54002958  | 0.07717124  |
| C  | -4.27282780 | 2.18425292  | -0.82003416 |
| H  | -3.86565611 | 2.93825828  | -0.15980647 |
| H  | -3.65276256 | 2.12533331  | -1.70251263 |
| H  | -5.27111178 | 2.47874939  | -1.10764360 |
| H  | -1.83223561 | 2.28993305  | -0.44107775 |
| N  | -5.41808761 | 0.31539684  | 0.15795578  |
| C  | 0.54851865  | 3.02708233  | -0.62978815 |
| H  | -0.20813810 | 3.58109767  | -1.15461888 |
| C  | 1.68086968  | 3.66729278  | -0.32093124 |
| H  | 2.48961558  | 3.22364713  | 0.21917072  |
| H  | 1.80587575  | 4.68857115  | -0.62321988 |
| Br | 1.63102233  | 0.89360335  | 2.00039261  |
| Br | 2.69855753  | 0.56257277  | -0.99913283 |
| Br | 1.48581331  | -2.29309204 | 0.68042767  |
| Br | -0.02762548 | -1.27885320 | -1.88314760 |
| H  | -6.28756572 | 0.74331199  | -0.07248667 |

**2d- $E_{in}$** 

|    |             |             |             |
|----|-------------|-------------|-------------|
| C  | 5.46564194  | 1.31123467  | -0.36552388 |
| C  | 4.17652134  | -0.40630543 | 0.54703254  |
| C  | 3.20263800  | 0.58359892  | 0.09918516  |
| C  | 4.00350458  | 1.76971478  | -0.42862146 |
| C  | 1.84667777  | 0.51364312  | 0.13963642  |
| C  | 1.06329120  | 1.65802112  | -0.29952326 |
| C  | 1.05268035  | -0.65642508 | 0.66329757  |
| C  | -0.28738666 | 1.73241281  | -0.32826300 |
| C  | -0.29511608 | -0.78408406 | -0.04686280 |
| H  | 1.56437381  | -1.58898603 | 0.53498210  |
| H  | 0.86810850  | -0.51668552 | 1.72028185  |
| C  | -1.12303805 | 0.52604397  | 0.07013838  |
| H  | 5.91092321  | 1.17145733  | -1.33903862 |
| H  | 1.59781270  | 2.53886352  | -0.58716211 |
| H  | 3.85179488  | 2.64556715  | 0.18609653  |
| H  | 3.72201452  | 2.02017339  | -1.43968075 |
| H  | 6.09801564  | 1.96423625  | 0.21525572  |
| C  | 3.97992564  | -1.72758110 | 1.21058313  |
| H  | 3.31607205  | -1.63192432 | 2.05640665  |
| H  | 3.54210797  | -2.42308012 | 0.50661416  |
| H  | 4.92541879  | -2.12666145 | 1.54672018  |
| N  | 5.36395879  | 0.01187046  | 0.30492532  |
| C  | -0.86622789 | 3.04415701  | -0.68907514 |
| H  | -0.19050040 | 3.65796421  | -1.25561590 |
| C  | -2.04126059 | 3.57506999  | -0.33594939 |
| H  | -2.77541497 | 3.06422146  | 0.24972551  |
| H  | -2.28124973 | 4.57305275  | -0.64649065 |
| H  | 6.16974620  | -0.52275463 | 0.54384821  |
| Br | -2.77624938 | 0.37365459  | -0.92971544 |
| Br | -1.61101539 | 0.83348031  | 2.01595121  |
| Br | -1.20593364 | -2.33171774 | 0.68839783  |
| Br | 0.08868687  | -1.17874931 | -1.93617902 |

**2d-Z<sub>out</sub>**

|    |             |             |             |
|----|-------------|-------------|-------------|
| C  | 5.34699408  | -0.96896614 | 0.85995236  |
| C  | 4.29463767  | 0.86734136  | -0.12182384 |
| C  | 3.19957585  | 0.00702254  | 0.31677089  |
| C  | 3.84304255  | -1.26526678 | 0.85741961  |
| C  | 1.86091971  | 0.22785256  | 0.25286495  |
| C  | 1.21966199  | 1.45210599  | -0.19656354 |
| C  | 0.92840915  | -0.84807478 | 0.75275508  |
| C  | -0.11620195 | 1.65773392  | -0.27168249 |
| C  | -0.39432151 | -0.84846809 | -0.00873274 |
| H  | 1.36602647  | -1.82582295 | 0.66001849  |
| H  | 0.72421943  | -0.67786483 | 1.80215080  |
| C  | -1.08710697 | 0.54004444  | 0.07737691  |
| H  | 5.75674110  | -0.85042342 | 1.85194987  |
| H  | 1.83283734  | 2.28866311  | -0.44121596 |
| H  | 3.62274604  | -2.10829357 | 0.21724925  |
| H  | 3.49377874  | -1.50407541 | 1.85014189  |
| H  | 5.93280876  | -1.70101051 | 0.32692896  |
| C  | 4.27198688  | 2.18421952  | -0.82081595 |
| H  | 3.65193719  | 2.12526021  | -1.70331892 |
| H  | 3.86506751  | 2.93866293  | -0.16087266 |
| H  | 5.27040050  | 2.47835853  | -1.10850042 |
| N  | 5.41749647  | 0.31619819  | 0.15809634  |
| C  | -0.54707548 | 3.02721778  | -0.62827627 |
| H  | 0.21062494  | 3.58187030  | -1.15089826 |
| C  | -1.67979916 | 3.66714171  | -0.32090287 |
| H  | -2.48966390 | 3.22300225  | 0.21699920  |
| H  | -1.80371496 | 4.68888811  | -0.62219017 |
| Br | -2.69846731 | 0.56327333  | -0.99969658 |
| Br | -1.63001166 | 0.89415031  | 2.00068945  |
| Br | -1.48752909 | -2.29326690 | 0.68084508  |
| Br | 0.02630840  | -1.27991743 | -1.88367563 |
| H  | 6.28678021  | 0.74458778  | -0.07236584 |

**3a- $E_{out}$** 

|   |             |             |             |
|---|-------------|-------------|-------------|
| C | -1.54390616 | 0.92529689  | -0.19295260 |
| C | -0.63595298 | -0.22500161 | -0.24392833 |
| C | -1.32327451 | -1.58502911 | -0.33312719 |
| C | 0.72358224  | -0.10977798 | -0.23249825 |
| C | 1.56823526  | -1.28222935 | -0.50167877 |
| C | 1.50281177  | 1.15811864  | 0.05503782  |
| C | 2.89835860  | -1.28334240 | -0.31908453 |
| C | 2.72640639  | 0.86420583  | 0.92659114  |
| H | 1.83265938  | 1.58981266  | -0.88591155 |
| H | 0.89798822  | 1.89248208  | 0.55816758  |
| C | 3.66308004  | -0.13065149 | 0.25674293  |
| H | 3.24328489  | 1.79166992  | 1.13491158  |
| H | 2.39477727  | 0.46535956  | 1.87966095  |
| H | 4.39811445  | -0.49685570 | 0.96282520  |
| H | 4.22400877  | 0.35046277  | -0.54047207 |
| H | 1.11512084  | -2.15276743 | -0.92823090 |
| H | -0.68230861 | -2.34219421 | 0.08496952  |
| H | -1.50534735 | -1.86791372 | -1.36716724 |
| C | -1.23411315 | 2.31474744  | -0.68391687 |
| H | -0.91968952 | 2.94535943  | 0.13627333  |
| H | -0.45831989 | 2.30038392  | -1.42881595 |
| H | -2.12267486 | 2.75038376  | -1.12129229 |
| N | -2.75521263 | 0.73756250  | 0.22108678  |
| C | -3.28914947 | -0.50063279 | 0.68270198  |
| H | -4.22293631 | -0.42291876 | 1.19558059  |
| C | -2.62422808 | -1.61529529 | 0.41740564  |
| H | -3.02898342 | -2.55838551 | 0.72463233  |
| H | -3.38178482 | 1.51349997  | 0.19579640  |
| H | 3.45473863  | -2.15449305 | -0.61109923 |

**3a-Z<sub>in</sub>**

|   |             |             |             |
|---|-------------|-------------|-------------|
| C | 2.74171212  | -1.55977267 | -0.30706207 |
| C | 1.35042148  | -1.57886511 | 0.25988197  |
| C | 0.64477078  | -0.23533359 | 0.10316183  |
| C | 1.51745418  | 0.94036042  | 0.18985967  |
| H | 3.21152052  | -2.48554560 | -0.57146924 |
| H | 0.79227136  | -2.34387515 | -0.25278318 |
| H | 1.39915957  | -1.87952964 | 1.30374374  |
| C | -0.70274823 | -0.15362728 | -0.09038181 |
| C | -1.41489584 | 1.06083132  | -0.50929624 |
| C | -1.58319512 | -1.38322350 | 0.01220339  |
| C | -2.75349749 | 1.12695214  | -0.59032613 |
| C | -2.94305995 | -1.04227654 | 0.62317412  |
| H | -1.72338983 | -1.79061193 | -0.98610425 |
| H | -1.11485290 | -2.14972131 | 0.60843409  |
| C | -3.67487959 | 0.01435876  | -0.19219856 |
| H | -3.53697479 | -1.94347334 | 0.69630628  |
| H | -2.79459051 | -0.68049924 | 1.63561204  |
| H | -4.51235774 | 0.41578511  | 0.36522198  |
| H | -4.09542066 | -0.42340357 | -1.09391162 |
| C | 1.10162702  | 2.31195188  | 0.65234391  |
| H | 0.91626096  | 2.95608331  | -0.19679311 |
| H | 0.21191180  | 2.26774303  | 1.25525783  |
| H | 1.89792646  | 2.75115970  | 1.23876323  |
| H | -0.85210521 | 1.89883276  | -0.86016805 |
| N | 2.77872795  | 0.79230986  | -0.05667513 |
| C | 3.40489153  | -0.42312847 | -0.46019096 |
| H | 4.39738789  | -0.31174445 | -0.83915454 |
| H | 3.37382219  | 1.58378816  | 0.06543052  |
| H | -3.19734798 | 2.02072396  | -0.98826172 |

**3a- $E_{in}$** 

|   |             |             |             |
|---|-------------|-------------|-------------|
| C | 1.53214134  | 0.93821197  | -0.19152789 |
| C | 0.63362191  | -0.21941740 | -0.24050345 |
| C | 1.33206718  | -1.57436824 | -0.31997581 |
| C | -0.72689008 | -0.11505824 | -0.23515553 |
| C | -1.56095710 | -1.29549618 | -0.50208943 |
| C | -1.51746005 | 1.14801118  | 0.04225734  |
| C | -2.89184894 | -1.30634244 | -0.32526006 |
| C | -2.74257746 | 0.84892416  | 0.90990926  |
| H | -0.92081925 | 1.88985671  | 0.54417851  |
| H | -1.84648593 | 1.57208254  | -0.90245451 |
| C | -3.66825095 | -0.15697516 | 0.24131977  |
| H | -1.09907763 | -2.16464233 | -0.92201550 |
| H | 1.52083503  | -1.86086972 | -1.35185441 |
| H | 0.69530480  | -2.33458158 | 0.09904996  |
| C | 1.21338218  | 2.32274731  | -0.69053191 |
| H | 0.44115617  | 2.29858439  | -1.43890451 |
| H | 0.89009938  | 2.95465956  | 0.12522201  |
| H | 2.10038153  | 2.76356810  | -1.12590200 |
| N | 2.74317039  | 0.76221435  | 0.22853066  |
| C | 3.28496550  | -0.46936710 | 0.69853006  |
| H | 4.21611234  | -0.38175254 | 1.21462618  |
| C | 2.62994478  | -1.59060104 | 0.43617006  |
| H | 3.04099407  | -2.52892119 | 0.74966158  |
| H | 3.36380190  | 1.54284943  | 0.20152417  |
| H | -3.43991091 | -2.18345595 | -0.61515262 |
| H | -4.22970509 | 0.31542048  | -0.56071613 |
| H | -4.40326958 | -0.52545750 | 0.94622375  |
| H | -2.41203986 | 0.45788988  | 1.86659322  |
| H | -3.26780365 | 1.77330854  | 1.11093222  |



**3a-Z<sub>out</sub>**

|   |             |             |             |
|---|-------------|-------------|-------------|
| C | -1.51699698 | 0.94013428  | 0.18796335  |
| C | -0.64461263 | -0.23570712 | 0.09921276  |
| C | -1.34939229 | -1.58002783 | 0.25480105  |
| C | 0.70282651  | -0.15394948 | -0.09447425 |
| C | 1.41564135  | 1.06057593  | -0.51255008 |
| C | 1.58355239  | -1.38330779 | 0.00771601  |
| C | 2.75440283  | 1.12740984  | -0.58865726 |
| C | 2.94042380  | -1.04212940 | 0.62529285  |
| H | 1.11371071  | -2.15226287 | 0.59952014  |
| H | 1.72829308  | -1.78719431 | -0.99135333 |
| C | 3.67507514  | 0.01603231  | -0.18562657 |
| H | 4.10135072  | -0.42067239 | -1.08513318 |
| H | 4.50880961  | 0.41856334  | 0.37659934  |
| H | 0.85330840  | 1.89734287  | -0.86709875 |
| H | -1.39118404 | -1.88518295 | 1.29765404  |
| H | -0.79424033 | -2.34271619 | -0.26475091 |
| C | -1.09946486 | 2.31209569  | 0.64792687  |
| H | -0.20840792 | 2.26830493  | 1.24887284  |
| H | -0.91563699 | 2.95503133  | -0.20249856 |
| H | -1.89425131 | 2.75247227  | 1.23554487  |
| H | 3.53481414  | -1.94285242 | 0.70034055  |
| H | 2.78689152  | -0.68150959 | 1.63739921  |
| C | -2.74431362 | -1.56000982 | -0.30287747 |
| H | -3.21618758 | -2.48576072 | -0.56355002 |
| C | -3.40826653 | -0.42340274 | -0.45207072 |
| N | -2.77921511 | 0.79240617  | -0.05384595 |
| H | -3.37370004 | 1.58375145  | 0.07197583  |
| H | -4.40302703 | -0.31183350 | -0.82503651 |
| H | 3.19925004  | 2.02063569  | -0.98667914 |

**3b- $E_{out}$** 

|   |             |             |             |
|---|-------------|-------------|-------------|
| C | -2.47252182 | 0.90629652  | -0.31630697 |
| C | -1.65472052 | -0.30821653 | -0.31903378 |
| C | -2.43537614 | -1.61719939 | -0.22306250 |
| C | -0.29365129 | -0.30016749 | -0.42498838 |
| C | 0.44037546  | -1.54888282 | -0.63823881 |
| C | 0.60128182  | 0.91500949  | -0.33429501 |
| C | 1.77575931  | -1.62350179 | -0.54605445 |
| C | 1.89588569  | 0.66516402  | 0.47792911  |
| H | 0.86281211  | 1.22373228  | -1.34002662 |
| H | 0.09527179  | 1.74222188  | 0.13289826  |
| C | 2.71309321  | -0.49686340 | -0.17886739 |
| H | -0.09857018 | -2.42621051 | -0.93013702 |
| H | -1.81975774 | -2.37026485 | 0.23891214  |
| H | -2.69822449 | -1.99317469 | -1.20881307 |
| C | -2.10124387 | 2.22219458  | -0.94753664 |
| H | -1.67983775 | 2.89074121  | -0.20962872 |
| H | -1.38783662 | 2.08654932  | -1.74079757 |
| H | -2.98698921 | 2.68897983  | -1.35765873 |
| N | -3.66381286 | 0.84978463  | 0.18711908  |
| C | -4.25352463 | -0.29799456 | 0.79069324  |
| H | -5.14460688 | -0.10426130 | 1.34699951  |
| C | -3.68641185 | -1.47923686 | 0.59629978  |
| H | -4.13637839 | -2.35687761 | 1.01462743  |
| H | -4.23317973 | 1.66661720  | 0.12828752  |
| C | 3.78951358  | -1.06756894 | 0.76214362  |
| H | 3.36436623  | -1.54930498 | 1.63147207  |
| H | 4.37917164  | -1.80796316 | 0.23549842  |
| H | 4.46855262  | -0.29614486 | 1.10057494  |
| C | 3.42449377  | -0.06317096 | -1.47865329 |
| H | 4.23643152  | 0.62015948  | -1.27155919 |
| H | 3.84930939  | -0.93003371 | -1.96947490 |
| H | 2.75414155  | 0.40879652  | -2.18523610 |
| C | 2.67492109  | 1.98815494  | 0.49772288  |
| H | 2.85486731  | 2.37575902  | -0.49588376 |
| H | 2.11721173  | 2.73895990  | 1.04610357  |
| H | 3.63126303  | 1.87858642  | 0.99119055  |
| C | 1.50469951  | 0.33628281  | 1.93041714  |
| H | 2.36681303  | 0.35374708  | 2.58154004  |
| H | 0.81020522  | 1.08091296  | 2.30414457  |
| H | 1.03625832  | -0.63411711 | 2.03111061  |
| H | 2.24206401  | -2.56483356 | -0.77682156 |

**3b-Z<sub>in</sub>**

|   |             |             |             |
|---|-------------|-------------|-------------|
| C | 3.63715887  | -1.64460924 | -0.45400548 |
| C | 2.22415634  | -1.58424243 | 0.05174636  |
| C | 1.64681647  | -0.17213972 | 0.00253828  |
| C | 2.61453038  | 0.90848526  | 0.20598342  |
| H | 4.03687731  | -2.58520898 | -0.77532649 |
| H | 1.62542762  | -2.24103295 | -0.55673630 |
| H | 2.19392840  | -1.98711547 | 1.06116214  |
| C | 0.31511817  | 0.04442891  | -0.20220673 |
| C | -0.28909553 | 1.33912149  | -0.51913297 |
| C | -0.66943675 | -1.10302272 | -0.23250976 |
| C | -1.61680094 | 1.50641254  | -0.60220526 |
| C | -2.03921558 | -0.75985985 | 0.39771803  |
| H | -0.80346432 | -1.40079460 | -1.26725933 |
| H | -0.27753762 | -1.96093226 | 0.29037340  |
| C | -2.67472938 | 0.45539181  | -0.35636428 |
| C | 2.30491120  | 2.27587537  | 0.75583437  |
| H | 2.18729787  | 2.98821190  | -0.04965459 |
| H | 1.40448470  | 2.26537881  | 1.34415122  |
| H | 3.12417377  | 2.60782107  | 1.37985036  |
| H | 0.33632282  | 2.16559219  | -0.77892940 |
| N | 3.86775294  | 0.66757177  | -0.01006384 |
| C | 4.40342650  | -0.56453224 | -0.48495829 |
| H | 5.41842972  | -0.51458551 | -0.81416489 |
| H | 4.52290578  | 1.39192705  | 0.19258548  |
| C | -3.81877781 | 1.11321536  | 0.43617914  |
| H | -3.47558462 | 1.57258431  | 1.35269394  |
| H | -4.28127014 | 1.88780293  | -0.16348133 |
| H | -4.58924556 | 0.39583632  | 0.68569491  |
| C | -3.24048215 | 0.06505086  | -1.73897155 |
| H | -4.12317866 | -0.55127546 | -1.63979545 |
| H | -3.52853731 | 0.95653457  | -2.28251555 |
| H | -2.52189517 | -0.46597934 | -2.34946159 |
| C | -2.90793383 | -2.02253297 | 0.30892147  |
| H | -2.48198337 | -2.80823473 | 0.92207633  |
| H | -3.91087384 | -1.84173023 | 0.67220591  |
| H | -2.98151380 | -2.40146373 | -0.70131027 |
| C | -1.82282390 | -0.45154644 | 1.89110455  |
| H | -2.76280087 | -0.40050818 | 2.42165048  |
| H | -1.24031925 | -1.24186480 | 2.35097939  |
| H | -1.30272284 | 0.48364808  | 2.05675836  |
| H | -1.98010061 | 2.47086825  | -0.91044920 |

**3b- $E_{in}$** 

|   |             |             |             |
|---|-------------|-------------|-------------|
| C | 2.46437063  | 0.91740783  | -0.29055647 |
| C | 1.65282412  | -0.30207614 | -0.30659820 |
| C | 2.44160588  | -1.60455801 | -0.19496512 |
| C | 0.29371043  | -0.30089975 | -0.43079287 |
| C | -0.43347806 | -1.55367242 | -0.64658538 |
| C | -0.60783155 | 0.91057782  | -0.36006707 |
| C | -1.76919471 | -1.63317172 | -0.56532848 |
| C | -1.90729262 | 0.66127707  | 0.44459535  |
| H | -0.11061936 | 1.74635379  | 0.10115292  |
| H | -0.86301030 | 1.20601862  | -1.37141781 |
| C | -2.71436672 | -0.50904161 | -0.21021545 |
| H | 0.11147873  | -2.42957093 | -0.93154017 |
| H | 2.73818767  | -1.97145913 | -1.17466837 |
| H | 1.82014621  | -2.36663749 | 0.24337560  |
| C | 2.10257924  | 2.22699209  | -0.94005372 |
| H | 1.40657221  | 2.08216101  | -1.74714276 |
| H | 1.66337079  | 2.90014933  | -0.21682230 |
| H | 2.99539869  | 2.69350346  | -1.33498213 |
| N | 3.64258042  | 0.86906915  | 0.24315241  |
| C | 4.22064123  | -0.27282917 | 0.86950587  |
| H | 5.09451399  | -0.07165655 | 1.44999035  |
| C | 3.66626921  | -1.45803308 | 0.66241003  |
| H | 4.10856699  | -2.33185119 | 1.09660281  |
| H | 4.20982053  | 1.68811545  | 0.19464225  |
| C | -3.79358660 | -1.07975660 | 0.72756977  |
| H | -4.37954595 | -1.82261542 | 0.20027055  |
| H | -3.37098288 | -1.55847473 | 1.59983846  |
| H | -4.47563119 | -0.30895172 | 1.06134710  |
| C | -3.42001102 | -0.08645632 | -1.51676800 |
| H | -3.83344020 | -0.95880837 | -2.00759758 |
| H | -4.23949415 | 0.59038650  | -1.31813758 |
| H | -2.74883360 | 0.38900735  | -2.22017770 |
| C | -2.69250259 | 1.98074502  | 0.44903454  |
| H | -2.14242207 | 2.73803356  | 0.99620517  |
| H | -2.86663081 | 2.36038319  | -0.54866999 |
| H | -3.65211008 | 1.87031876  | 0.93594602  |
| C | -1.52539782 | 0.34458220  | 1.90216418  |
| H | -0.83962991 | 1.09690029  | 2.27667891  |
| H | -2.39284675 | 0.35956299  | 2.54621490  |
| H | -1.05044828 | -0.62156898 | 2.01279930  |
| H | -2.22991273 | -2.57730819 | -0.79589134 |

**3b-Z<sub>out</sub>**

|   |             |             |             |
|---|-------------|-------------|-------------|
| C | -2.61436154 | 0.90838767  | 0.20533128  |
| C | -1.64662280 | -0.17163300 | -0.00005983 |
| C | -2.22240142 | -1.58461655 | 0.04714178  |
| C | -0.31477023 | 0.04509105  | -0.20447626 |
| C | 0.28999935  | 1.33985879  | -0.52008375 |
| C | 0.66951839  | -1.10251162 | -0.23491502 |
| C | 1.61780964  | 1.50710340  | -0.60175172 |
| C | 2.03858069  | -0.75979744 | 0.39726381  |
| C | 2.67521425  | 0.45574168  | -0.35549581 |
| H | -0.33513215 | 2.16636890  | -0.78021340 |
| H | -2.18482898 | -1.99179591 | 1.05459822  |
| H | -1.62665740 | -2.23794833 | -0.56818541 |
| C | -2.30432268 | 2.27707301  | 0.75183027  |
| H | -1.40377550 | 2.26811227  | 1.33997910  |
| H | -2.18685471 | 2.98728830  | -0.05554222 |
| H | -3.12340883 | 2.61077068  | 1.37516495  |
| C | -3.63841025 | -1.64576184 | -0.44985219 |
| H | -4.03952186 | -2.58690453 | -0.76793430 |
| C | -4.40549323 | -0.56619851 | -0.47753793 |
| N | -3.86821665 | 0.66669322  | -0.00644759 |
| H | -4.52287295 | 1.39112514  | 0.19751941  |
| H | -5.42251391 | -0.51730676 | -0.80072802 |
| C | 1.82028229  | -0.45186792 | 1.89046560  |
| H | 1.23601059  | -1.24153056 | 2.34924506  |
| H | 2.75954533  | -0.40233767 | 2.42242528  |
| H | 1.30128332  | 0.48399957  | 2.05572816  |
| C | 2.90717131  | -2.02262557 | 0.30930508  |
| H | 2.98245860  | -2.40102348 | -0.70099731 |
| H | 3.90948881  | -1.84234627 | 0.67455615  |
| H | 2.47979540  | -2.80854824 | 0.92119215  |
| H | 1.98150365  | 2.47151502  | -0.90962970 |
| H | 0.80468812  | -1.39933234 | -1.26979239 |
| H | 0.27699920  | -1.96087357 | 0.28672917  |
| C | 3.81877725  | 1.11254046  | 0.43854865  |
| H | 4.58966564  | 0.39502270  | 0.68640813  |
| H | 4.28087546  | 1.88868970  | -0.15941057 |
| H | 3.47544579  | 1.56969911  | 1.35608735  |
| C | 3.24219377  | 0.06599600  | -1.73768714 |
| H | 3.53301479  | 0.95750510  | -2.27970924 |
| H | 4.12339414  | -0.55236519 | -1.63801396 |
| H | 2.52336135  | -0.46269345 | -2.34993485 |

**3c- $E_{\text{out}}$** 

|    |             |             |             |
|----|-------------|-------------|-------------|
| C  | -3.03579641 | 0.87487124  | -0.43426218 |
| C  | -2.24820954 | -0.37320744 | -0.43307785 |
| C  | -3.08973176 | -1.64131948 | -0.36503421 |
| C  | -0.88900461 | -0.39443419 | -0.47534995 |
| C  | -0.15545588 | -1.65747230 | -0.61884167 |
| C  | -0.00569807 | 0.83276822  | -0.37026334 |
| C  | 1.17435469  | -1.75567402 | -0.50173852 |
| C  | 1.26567640  | 0.55803948  | 0.44032109  |
| H  | 0.29581323  | 1.16031017  | -1.35562783 |
| H  | -0.50007742 | 1.64782359  | 0.12257969  |
| C  | 2.07765926  | -0.58965694 | -0.21259009 |
| H  | -0.69204474 | -2.54665449 | -0.87116538 |
| H  | -2.49956392 | -2.45718410 | 0.01256118  |
| H  | -3.43635899 | -1.93518125 | -1.35286407 |
| C  | -2.64909199 | 2.15528277  | -1.12533148 |
| H  | -2.19209263 | 2.84232562  | -0.42610232 |
| H  | -1.96052288 | 1.96830036  | -1.93129641 |
| H  | -3.53206673 | 2.62923346  | -1.53266922 |
| N  | -4.19842500 | 0.85718108  | 0.12586479  |
| C  | -4.78697237 | -0.26850319 | 0.77655357  |
| H  | -5.63137011 | -0.04141033 | 1.38992258  |
| C  | -4.27742371 | -1.46887165 | 0.54090805  |
| H  | -4.72861720 | -2.33297364 | 0.98487922  |
| H  | -4.75120136 | 1.68771386  | 0.08055811  |
| Cl | 3.43258223  | -1.11056005 | 0.79722270  |
| Cl | 2.73755513  | -0.05440511 | -1.79268868 |
| Cl | 2.19803738  | 2.05743458  | 0.55597744  |
| Cl | 0.77132522  | 0.08910829  | 2.09565183  |
| H  | 1.66955977  | -2.68938054 | -0.67310806 |

**3c-Z<sub>in</sub>**

|    |             |             |             |
|----|-------------|-------------|-------------|
| C  | -4.16497146 | 1.65260998  | -0.56273446 |
| C  | -2.79271808 | 1.56820586  | 0.04506924  |
| C  | -2.23436701 | 0.15204930  | -0.01367171 |
| C  | -3.23564914 | -0.91169263 | 0.18395037  |
| H  | -4.52304218 | 2.59751606  | -0.91822540 |
| H  | -2.14708160 | 2.24154090  | -0.49257434 |
| H  | -2.83448239 | 1.92984341  | 1.06973036  |
| C  | -0.91292579 | -0.09750660 | -0.21389009 |
| C  | -0.34464838 | -1.41468368 | -0.51535337 |
| C  | 0.08783859  | 1.04120864  | -0.23314752 |
| C  | 0.97022011  | -1.63711389 | -0.63100094 |
| C  | 1.44376804  | 0.62018668  | 0.34032760  |
| H  | 0.23818034  | 1.38400815  | -1.24855022 |
| H  | -0.24901136 | 1.87537956  | 0.35545516  |
| C  | 2.01896700  | -0.57283984 | -0.46508350 |
| C  | -2.97154666 | -2.25479700 | 0.81125693  |
| H  | -2.85499851 | -3.01262448 | 0.04777359  |
| H  | -2.08413365 | -2.23085777 | 1.41995721  |
| H  | -3.81132119 | -2.53407441 | 1.43356747  |
| H  | -0.99529672 | -2.23420334 | -0.72689583 |
| N  | -4.46548964 | -0.64952479 | -0.10789157 |
| C  | -4.94515345 | 0.58434146  | -0.64193582 |
| H  | -5.93533706 | 0.54537059  | -1.04051051 |
| H  | -5.15065991 | -1.34995967 | 0.08520388  |
| Cl | 3.46184205  | -1.26267347 | 0.29045465  |
| Cl | 2.45956014  | -0.04156798 | -2.12018160 |
| Cl | 1.18388753  | 0.12699264  | 2.04440174  |
| Cl | 2.52814887  | 2.01556402  | 0.33782396  |
| H  | 1.33663750  | -2.59955470 | -0.92429028 |

**3c- $E_{in}$** 

|    |             |             |             |
|----|-------------|-------------|-------------|
| C  | 3.05020442  | 0.88268395  | -0.42326601 |
| C  | 2.26711755  | -0.36785358 | -0.39738669 |
| C  | 3.11206390  | -1.63329422 | -0.31928707 |
| C  | 0.90763921  | -0.39435331 | -0.42819337 |
| C  | 0.17857430  | -1.66181456 | -0.55482323 |
| C  | 0.02050753  | 0.83035087  | -0.32641187 |
| C  | -1.14995247 | -1.76470677 | -0.42750985 |
| C  | -1.24350056 | 0.55665217  | 0.49601930  |
| H  | 0.51578304  | 1.65086412  | 0.15645219  |
| H  | -0.28996682 | 1.14919601  | -1.31179366 |
| C  | -2.05566961 | -0.59946950 | -0.14205948 |
| H  | 0.71762193  | -2.55047357 | -0.80391662 |
| H  | 3.44429288  | -1.94524417 | -1.30649738 |
| H  | 2.52831525  | -2.44247122 | 0.08233105  |
| C  | 2.65023017  | 2.15225834  | -1.12657073 |
| H  | 1.95984134  | 1.95007185  | -1.92743065 |
| H  | 2.19012929  | 2.84326027  | -0.43343237 |
| H  | 3.52726883  | 2.62926884  | -1.54296826 |
| N  | 4.21977211  | 0.87628245  | 0.12236724  |
| C  | 4.82130360  | -0.23921091 | 0.77887252  |
| H  | 5.67396269  | -0.00154440 | 1.37660342  |
| C  | 4.31267368  | -1.44416525 | 0.56593990  |
| H  | 4.77365484  | -2.30095540 | 1.01403772  |
| H  | 4.76937273  | 1.70768851  | 0.05847253  |
| H  | -1.64250198 | -2.70208081 | -0.58602390 |
| Cl | -3.40226045 | -1.11570884 | 0.88136353  |
| Cl | -2.72747140 | -0.07960521 | -1.72237335 |
| Cl | -2.18160854 | 2.05295558  | 0.60718501  |
| Cl | -0.73518147 | 0.10215673  | 2.15140410  |



**3c-Z<sub>out</sub>**

|    |             |             |             |
|----|-------------|-------------|-------------|
| C  | 3.23560226  | -0.91170128 | 0.18449398  |
| C  | 2.23431730  | 0.15224734  | -0.01219120 |
| C  | 2.79336141  | 1.56802656  | 0.04709127  |
| C  | 0.91290112  | -0.09719309 | -0.21261321 |
| C  | 0.34505753  | -1.41439091 | -0.51481131 |
| C  | -0.08793117 | 1.04142546  | -0.23183275 |
| C  | -0.96966642 | -1.63695562 | -0.63188082 |
| C  | -1.44440427 | 0.61990808  | 0.33993070  |
| H  | 0.24832402  | 1.87510090  | 0.35782638  |
| H  | -0.23731887 | 1.38509035  | -1.24708369 |
| C  | -2.01864987 | -0.57272117 | -0.46680765 |
| H  | 0.99605610  | -2.23379416 | -0.72582630 |
| H  | 2.83837604  | 1.92802989  | 1.07217927  |
| H  | 2.14664165  | 2.24258663  | -0.48761899 |
| C  | 2.97196895  | -2.25421365 | 0.81328420  |
| H  | 2.08443114  | -2.22994050 | 1.42178034  |
| H  | 2.85593517  | -3.01301727 | 0.05068537  |
| H  | 3.81175056  | -2.53229682 | 1.43613073  |
| C  | 4.16402563  | 1.65212192  | -0.56442336 |
| H  | 4.52140585  | 2.59683207  | -0.92113740 |
| C  | 4.94379424  | 0.58364352  | -0.64513392 |
| N  | 4.46498762  | -0.64992151 | -0.10955350 |
| H  | 5.15042392  | -1.35028442 | 0.08289449  |
| H  | 5.93295478  | 0.54421897  | -1.04620404 |
| Cl | -3.46249606 | -1.26280041 | 0.28662498  |
| Cl | -2.45713930 | -0.04051615 | -2.12215423 |
| Cl | -1.18640772 | 0.12573929  | 2.04397519  |
| Cl | -2.52878619 | 2.01531994  | 0.33699752  |
| H  | -1.33573142 | -2.59940096 | -0.92558706 |

**3d- $E_{out}$** 

|    |             |             |             |
|----|-------------|-------------|-------------|
| C  | 3.79821424  | 0.48965066  | 0.84952809  |
| C  | 3.00533539  | -0.63138588 | 0.32819782  |
| C  | 3.82029731  | -1.78721050 | -0.24676695 |
| C  | 1.64179562  | -0.65601612 | 0.34469461  |
| C  | 0.91641047  | -1.87283674 | -0.03244567 |
| C  | 0.75068755  | 0.51072019  | 0.72500764  |
| C  | -0.41490005 | -1.92790568 | -0.17527373 |
| C  | -0.52561416 | 0.56189433  | -0.12368842 |
| H  | 0.45626301  | 0.42219215  | 1.76217822  |
| H  | 1.24258020  | 1.45392685  | 0.59244248  |
| C  | -1.32321824 | -0.75045553 | 0.01228407  |
| H  | 1.45870648  | -2.78555226 | -0.15407651 |
| H  | 3.24561230  | -2.29205137 | -1.00444651 |
| H  | 4.04790324  | -2.52679593 | 0.51723853  |
| C  | 3.36819441  | 1.43959172  | 1.93057185  |
| H  | 2.94608590  | 2.33450783  | 1.49219183  |
| H  | 2.63876999  | 0.99107145  | 2.58206501  |
| H  | 4.22772744  | 1.72941192  | 2.51888802  |
| N  | 4.99978178  | 0.64126608  | 0.41518903  |
| C  | 5.63338131  | -0.17155119 | -0.56555392 |
| H  | 6.54019800  | 0.23131501  | -0.96184017 |
| C  | 5.10055831  | -1.32312685 | -0.87703904 |
| H  | 5.58511870  | -1.95789154 | -1.59140131 |
| H  | 5.54823093  | 1.37472248  | 0.80784731  |
| Br | -2.04015178 | -0.95886843 | 1.89445709  |
| Br | -2.83798424 | -0.87215391 | -1.18198252 |
| Br | -1.56022744 | 2.16189583  | 0.43898882  |
| Br | 0.01190052  | 0.85546150  | -1.98610865 |
| H  | -0.89457517 | -2.86217908 | -0.38299702 |

**3d-Z<sub>in</sub>**

|    |             |             |             |
|----|-------------|-------------|-------------|
| C  | -4.93864330 | 1.07052836  | -1.37310736 |
| C  | -3.56139281 | 1.26802248  | -0.80879105 |
| C  | -3.01866051 | -0.00650235 | -0.17174618 |
| C  | -4.02606085 | -0.85593841 | 0.47440667  |
| H  | -5.28982676 | 1.73990144  | -2.13249735 |
| H  | -2.91238301 | 1.57903477  | -1.61065796 |
| H  | -3.58320156 | 2.08724201  | -0.09361998 |
| C  | -1.68990303 | -0.30654737 | -0.18776314 |
| C  | -1.11505917 | -1.60752733 | 0.15993139  |
| C  | -0.68887234 | 0.71088011  | -0.69989055 |
| C  | 0.20391458  | -1.84281075 | 0.18690771  |
| C  | 0.65244910  | 0.60840365  | 0.03318031  |
| H  | -0.51704834 | 0.55031887  | -1.75693174 |
| H  | -1.04843480 | 1.71523410  | -0.57082327 |
| C  | 1.24505380  | -0.80746048 | -0.11452001 |
| C  | -3.77507648 | -1.77587318 | 1.63512237  |
| H  | -3.66205817 | -2.79330489 | 1.28236745  |
| H  | -2.89176380 | -1.49096607 | 2.17954841  |
| H  | -4.62506330 | -1.74830421 | 2.30330603  |
| H  | -1.75885761 | -2.44268594 | 0.32443674  |
| N  | -5.25010646 | -0.74586124 | 0.09281331  |
| C  | -5.71418816 | 0.10897355  | -0.94629371 |
| H  | -6.70609314 | -0.09756810 | -1.28581207 |
| H  | -5.94031492 | -1.27896974 | 0.57517912  |
| Br | 2.82447748  | -1.11271792 | 0.95930266  |
| Br | 1.76189824  | -1.16239951 | -2.03892246 |
| Br | 0.31798564  | 1.01911062  | 1.92496089  |
| Br | 1.84968875  | 2.02909564  | -0.66409821 |
| H  | 0.56831893  | -2.83345407 | 0.36580103  |

**3d- $E_{in}$** 

|    |             |             |             |
|----|-------------|-------------|-------------|
| C  | -3.82370085 | 0.44596186  | 0.86027556  |
| C  | -3.03136018 | -0.62100417 | 0.23604888  |
| C  | -3.84329336 | -1.72964685 | -0.43040965 |
| C  | -1.66703488 | -0.64583314 | 0.24354833  |
| C  | -0.94631183 | -1.82797672 | -0.23651366 |
| C  | -0.77462157 | 0.48524376  | 0.71704057  |
| C  | 0.38571683  | -1.87866051 | -0.37277659 |
| C  | 0.51803902  | 0.59803761  | -0.10052296 |
| H  | -1.26251687 | 1.43724288  | 0.64698234  |
| H  | -0.49404524 | 0.32079007  | 1.74878988  |
| C  | 1.29974237  | -0.73005722 | -0.07335911 |
| H  | -1.49270427 | -2.72268112 | -0.44289207 |
| H  | -4.03711821 | -2.54554500 | 0.26166248  |
| H  | -3.27967540 | -2.14568237 | -1.24829608 |
| C  | -3.37957937 | 1.31598711  | 2.00122943  |
| H  | -2.64714224 | 0.81924831  | 2.61323492  |
| H  | -2.95563795 | 2.23687812  | 1.62289301  |
| H  | -4.23200306 | 1.56846927  | 2.61631490  |
| N  | -5.03694349 | 0.61717026  | 0.46658895  |
| C  | -5.68696946 | -0.12198840 | -0.56025604 |
| H  | -6.61067902 | 0.29715801  | -0.89584250 |
| C  | -5.14745572 | -1.23458983 | -0.98179927 |
| H  | -5.64407172 | -1.81558214 | -1.73271173 |
| H  | -5.58195769 | 1.31257551  | 0.92716458  |
| H  | 0.86131387  | -2.79363929 | -0.66027605 |
| Br | 2.82570061  | -0.76257260 | -1.25876815 |
| Br | 1.99309430  | -1.10239643 | 1.79309908  |
| Br | 1.53168682  | 2.10946967  | 0.55610220  |
| Br | -0.03017546 | 1.03733731  | -1.99044931 |

**3d-Z<sub>out</sub>**

|    |             |             |             |
|----|-------------|-------------|-------------|
| C  | 4.02682213  | -0.85993532 | 0.46492526  |
| C  | 3.01948395  | -0.02379827 | -0.18576609 |
| C  | 3.54502021  | 1.24822506  | -0.84703607 |
| C  | 1.68775024  | -0.31724600 | -0.18421872 |
| C  | 1.10365487  | -1.60755547 | 0.17816644  |
| C  | 0.69298572  | 0.70397931  | -0.70125819 |
| C  | -0.21807668 | -1.82942652 | 0.20973154  |
| C  | -0.65254177 | 0.62780737  | 0.03035873  |
| H  | 1.06357431  | 1.70584367  | -0.58381285 |
| H  | 0.52003113  | 0.53530718  | -1.75706086 |
| C  | -1.25183516 | -0.79017579 | -0.09861286 |
| H  | 1.73858393  | -2.44774714 | 0.34744596  |
| H  | 3.51160258  | 2.08892589  | -0.15818937 |
| H  | 2.91367673  | 1.51079405  | -1.68048580 |
| C  | 3.77653148  | -1.81168225 | 1.60077482  |
| H  | 2.89656446  | -1.54034765 | 2.15727537  |
| H  | 3.66093508  | -2.81891340 | 1.22081065  |
| H  | 4.62808469  | -1.80411306 | 2.26711413  |
| C  | 4.94607498  | 1.08844689  | -1.35969909 |
| H  | 5.30353633  | 1.76722305  | -2.10766428 |
| C  | 5.73388608  | 0.15106858  | -0.90379283 |
| N  | 5.26035938  | -0.72017255 | 0.11515993  |
| H  | 5.94704243  | -1.25031034 | 0.60460723  |
| H  | 6.74300718  | -0.02437857 | -1.20838106 |
| Br | -2.82941743 | -1.07703900 | 0.98087991  |
| Br | -1.77359866 | -1.16913221 | -2.01876657 |
| Br | -1.81180491 | 2.01531090  | -0.65957852 |
| Br | -0.30204146 | 1.04243158  | 1.92174807  |
| H  | -0.59066984 | -2.81553697 | 0.39711714  |

**4a- $E_{out}$** 

|   |             |             |             |
|---|-------------|-------------|-------------|
| C | -2.35609388 | 0.68105313  | -0.27667660 |
| C | -1.19244606 | -0.19565646 | -0.16142884 |
| C | -1.49710731 | -1.69206467 | -0.11822880 |
| C | 0.09654269  | 0.26269172  | -0.12177542 |
| C | 1.20871672  | -0.67715155 | -0.24566268 |
| C | 0.51461932  | 1.70631545  | 0.06188786  |
| C | 2.51030024  | -0.35246098 | -0.06357263 |
| C | 1.74050581  | 1.79611100  | 0.96868724  |
| H | 0.75657073  | 2.13361220  | -0.90720827 |
| H | -0.27345016 | 2.29759910  | 0.49468937  |
| C | 2.91787220  | 1.02161148  | 0.39803355  |
| H | 2.00768898  | 2.83595728  | 1.10421212  |
| H | 1.48703249  | 1.40447476  | 1.94831205  |
| H | 3.69768047  | 0.94002716  | 1.14291475  |
| H | 3.35022384  | 1.55769339  | -0.44229588 |
| H | 0.99078326  | -1.67088508 | -0.57813725 |
| H | -0.73926396 | -2.19507467 | 0.45917439  |
| H | -1.46869611 | -2.12864918 | -1.11359881 |
| C | -2.36287398 | 2.06836807  | -0.86337437 |
| H | -2.26296998 | 2.81084563  | -0.08382219 |
| H | -1.56298674 | 2.19686992  | -1.57074767 |
| H | -3.30149285 | 2.24097977  | -1.37288625 |
| N | -3.51848192 | 0.22179515  | 0.06450872  |
| C | 3.53769341  | -1.35984375 | -0.34753740 |
| H | 3.17413781  | -2.32381635 | -0.65520862 |
| C | 4.86209528  | -1.17027299 | -0.27388455 |
| H | 5.30263564  | -0.23664286 | 0.01544632  |
| H | 5.53957806  | -1.96577832 | -0.51397292 |
| C | -3.77397555 | -1.07366433 | 0.59697735  |
| H | -4.74882162 | -1.20256814 | 1.01430516  |
| C | -2.82695477 | -1.99535882 | 0.50867517  |
| H | -3.01640568 | -2.98448921 | 0.87396018  |
| H | -4.31056336 | 0.81079613  | -0.07726707 |

**4a-Z<sub>in</sub>**

|   |             |             |             |
|---|-------------|-------------|-------------|
| C | -3.60436415 | 0.97768458  | -0.63090031 |
| C | -2.30815825 | 1.41910421  | -0.01354353 |
| C | -1.29724200 | 0.28061493  | 0.09522772  |
| C | -1.86897996 | -1.04915358 | 0.30664738  |
| H | -4.25682705 | 1.71292776  | -1.05685468 |
| H | -1.90051991 | 2.20749402  | -0.62420285 |
| H | -2.51362939 | 1.85875581  | 0.95953932  |
| C | 0.04670533  | 0.51925900  | 0.01818534  |
| C | 1.06486306  | -0.51202554 | -0.16502100 |
| C | 0.57938346  | 1.93626075  | 0.01245591  |
| C | 2.39727042  | -0.27382671 | -0.16132782 |
| C | 1.91165006  | 2.01406586  | 0.75263247  |
| H | 0.71279845  | 2.25377371  | -1.01884849 |
| H | -0.11921273 | 2.61811633  | 0.47041488  |
| C | 2.95371135  | 1.09383048  | 0.13563269  |
| H | 2.26675932  | 3.03601775  | 0.74683437  |
| H | 1.75515658  | 1.74214765  | 1.79161561  |
| H | 3.80396377  | 1.00579247  | 0.79848669  |
| H | 3.32963869  | 1.51893493  | -0.79077005 |
| C | -1.18239465 | -2.20563370 | 0.98479407  |
| H | -0.76890418 | -2.88274536 | 0.24940012  |
| H | -0.39039886 | -1.86693506 | 1.62904072  |
| H | -1.90235746 | -2.75434969 | 1.57762545  |
| H | 0.74845203  | -1.49960693 | -0.42400392 |
| N | -3.10486818 | -1.25297794 | -0.02210619 |
| C | 3.31193706  | -1.37171389 | -0.49492446 |
| H | 2.84962734  | -2.32244700 | -0.69292935 |
| C | 4.64540137  | -1.28094830 | -0.58801354 |
| H | 5.18111524  | -0.36849933 | -0.41570869 |
| H | 5.23210914  | -2.13910126 | -0.85040147 |
| C | -3.96570694 | -0.29679949 | -0.63376396 |
| H | -4.87024367 | -0.69961318 | -1.03464061 |
| H | -3.50175226 | -2.14375027 | 0.18734416  |

**4a- $E_{in}$** 

|   |             |             |             |
|---|-------------|-------------|-------------|
| C | 2.35028746  | 0.69804310  | -0.27132639 |
| C | 1.19220122  | -0.18629740 | -0.15737368 |
| C | 1.50789307  | -1.68006679 | -0.10611292 |
| C | -0.10005649 | 0.26321159  | -0.12553449 |
| C | -1.20538601 | -0.68466179 | -0.24951283 |
| C | -0.52879680 | 1.70483161  | 0.04900504  |
| C | -2.50974398 | -0.36815463 | -0.07288893 |
| C | -1.75814177 | 1.79085599  | 0.95150405  |
| H | 0.25366837  | 2.30410059  | 0.48099884  |
| H | -0.77068173 | 2.12507996  | -0.92319139 |
| C | -2.92835435 | 1.00502312  | 0.38153310  |
| H | -3.36270792 | 1.53414549  | -0.46216985 |
| H | -3.70930001 | 0.92097724  | 1.12497940  |
| H | -0.97957797 | -1.67842898 | -0.57659704 |
| H | 1.49144536  | -2.12046330 | -1.10011852 |
| H | 0.74926581  | -2.18700469 | 0.46672858  |
| C | 2.35057342  | 2.08157623  | -0.86680806 |
| H | 1.55379069  | 2.19972644  | -1.57951295 |
| H | 2.24088090  | 2.82825786  | -0.09261638 |
| H | 3.29084374  | 2.25775031  | -1.37205156 |
| H | -2.03306498 | 2.82952077  | 1.08046491  |
| H | -1.50493603 | 1.40643847  | 1.93405099  |
| N | 3.51369366  | 0.24917875  | 0.08000780  |
| C | -3.52929433 | -1.38373854 | -0.35585703 |
| H | -3.15818316 | -2.34667503 | -0.65772256 |
| C | -4.85521196 | -1.20273803 | -0.28785962 |
| H | -5.30303966 | -0.27070373 | -0.00459996 |
| H | -5.52647231 | -2.00388476 | -0.52667874 |
| C | 3.77454490  | -1.04091249 | 0.62282655  |
| H | 4.74708930  | -1.16008179 | 1.04836539  |
| C | 2.83493626  | -1.97006888 | 0.53309786  |
| H | 3.02859177  | -2.95538839 | 0.90641835  |
| H | 4.30255655  | 0.84277472  | -0.06059896 |



**4a-Z<sub>out</sub>**

|   |             |             |             |
|---|-------------|-------------|-------------|
| C | 1.86877052  | -1.04895344 | 0.30650982  |
| C | 1.29731138  | 0.28075693  | 0.09470802  |
| C | 2.30814394  | 1.41925624  | -0.01439955 |
| C | -0.04667950 | 0.51938737  | 0.01742266  |
| C | -1.06474998 | -0.51190839 | -0.16596118 |
| C | -0.57956306 | 1.93624154  | 0.01148568  |
| C | -2.39725791 | -0.27385337 | -0.16140351 |
| C | -1.91113627 | 2.01383912  | 0.75296776  |
| H | 0.11927984  | 2.61858523  | 0.46831440  |
| H | -0.71407420 | 2.25327873  | -1.01983277 |
| C | -2.95366971 | 1.09353369  | 0.13680907  |
| H | -3.33085488 | 1.51892619  | -0.78897104 |
| H | -3.80313369 | 1.00495728  | 0.80061589  |
| H | -0.74842979 | -1.49925012 | -0.42595766 |
| H | 2.51276669  | 1.85979171  | 0.95843487  |
| H | 1.90086498  | 2.20710537  | -0.62594736 |
| C | 1.18166720  | -2.20547947 | 0.98416007  |
| H | 0.38852100  | -1.86713791 | 1.62710871  |
| H | 0.76969586  | -2.88299658 | 0.24830601  |
| H | 1.90101474  | -2.75357711 | 1.57837323  |
| H | -2.26636429 | 3.03574383  | 0.74753569  |
| H | -1.75359945 | 1.74183234  | 1.79176580  |
| C | -3.31189430 | -1.37161958 | -0.49536934 |
| H | -2.84962369 | -2.32213184 | -0.69460458 |
| C | -4.64553568 | -1.28101471 | -0.58732303 |
| H | -5.18123464 | -0.36880573 | -0.41367306 |
| H | -5.23225089 | -2.13905781 | -0.85004798 |
| C | 3.60494622  | 0.97763513  | -0.63025164 |
| H | 4.25795564  | 1.71281810  | -1.05557194 |
| C | 3.96638128  | -0.29687057 | -0.63212631 |
| N | 3.10491936  | -1.25288105 | -0.02130569 |
| H | 3.50145504  | -2.14381536 | 0.18818106  |
| H | 4.87137527  | -0.69968276 | -1.03203609 |

**4b- $E_{out}$** 

|   |             |             |             |
|---|-------------|-------------|-------------|
| C | -2.92617742 | -0.71038235 | 0.44601497  |
| C | -1.92215274 | 0.33066389  | 0.20551932  |
| C | -2.47449872 | 1.71612850  | -0.13416190 |
| C | -0.56778442 | 0.10873711  | 0.30225214  |
| C | 0.36359336  | 1.23148525  | 0.28169420  |
| C | 0.10838480  | -1.23508119 | 0.41748295  |
| C | 1.72105304  | 1.12501080  | 0.20945562  |
| C | 1.39590888  | -1.31634452 | -0.43508686 |
| H | 0.34897383  | -1.41935851 | 1.46600870  |
| H | -0.54191170 | -2.03877704 | 0.08950060  |
| C | 2.43600706  | -0.22843166 | 0.03885018  |
| H | -0.04535472 | 2.22205838  | 0.40177596  |
| H | -1.76702036 | 2.24192569  | -0.76758247 |
| H | -2.59973228 | 2.32689304  | 0.76640911  |
| C | -2.73769425 | -1.94125917 | 1.29674193  |
| H | -2.44766360 | -2.79203033 | 0.68183098  |
| H | -1.97860813 | -1.78054142 | 2.05359431  |
| H | -3.67569439 | -2.18639808 | 1.79492887  |
| N | -4.12570933 | -0.54231885 | -0.03033980 |
| C | 2.43936394  | 2.42026162  | 0.32856914  |
| H | 1.78734990  | 3.27814874  | 0.20853821  |
| C | 3.72711451  | 2.69660307  | 0.61433722  |
| H | 4.48952016  | 1.95542671  | 0.79016648  |
| H | 4.03960768  | 3.72944870  | 0.69061963  |
| C | -4.55715205 | 0.56674010  | -0.81775188 |
| H | -5.51212632 | 0.43586501  | -1.29827469 |
| C | -3.78614715 | 1.65273601  | -0.86768252 |
| H | -4.11738274 | 2.51310632  | -1.43103695 |
| H | -4.81893828 | -1.23344223 | 0.19194829  |
| C | 3.56768673  | -0.10449988 | -1.00720537 |
| H | 3.24603360  | 0.42883882  | -1.90090671 |
| H | 4.42808990  | 0.42218160  | -0.60659517 |
| H | 3.91807109  | -1.08991783 | -1.31026929 |
| C | 3.06553293  | -0.61689370 | 1.39763249  |
| H | 3.72244747  | -1.47946072 | 1.29009925  |
| H | 3.66528975  | 0.19885710  | 1.79418570  |
| H | 2.31610036  | -0.85302595 | 2.15385674  |
| C | 1.93280060  | -2.75089459 | -0.27008914 |
| H | 2.05713344  | -3.03122291 | 0.77557817  |
| H | 1.23050477  | -3.45842310 | -0.71662066 |
| H | 2.88897231  | -2.89321768 | -0.77148826 |
| C | 1.01313330  | -1.13342234 | -1.91959856 |
| H | 1.83457093  | -1.41109917 | -2.57790681 |
| H | 0.17218732  | -1.78511894 | -2.17042318 |
| H | 0.72628993  | -0.11034829 | -2.16337089 |

**4b-Z<sub>in</sub>**

|   |             |             |             |
|---|-------------|-------------|-------------|
| C | 4.14099194  | -1.19626091 | -0.80854689 |
| C | 2.76476146  | -1.47600619 | -0.26797333 |
| C | 1.97151027  | -0.19656947 | -0.00272717 |
| C | 2.76499553  | 0.96773568  | 0.40469140  |
| H | 4.67107480  | -1.97669338 | -1.33520115 |
| H | 2.23809546  | -2.08672920 | -0.99468926 |
| H | 2.85629647  | -2.08399989 | 0.63867233  |
| C | 0.60207210  | -0.17501713 | -0.12281613 |
| C | -0.21320900 | 1.03301661  | -0.16590080 |
| C | -0.17962306 | -1.44641952 | -0.34244657 |
| C | -1.57523123 | 1.05297425  | -0.22940930 |
| C | -1.55194850 | -1.42559847 | 0.36520155  |
| H | -0.30909195 | -1.58824916 | -1.41802851 |
| H | 0.36929057  | -2.31010178 | 0.02374763  |
| C | -2.42842829 | -0.22909155 | -0.17335881 |
| C | 2.27289029  | 2.12137184  | 1.24243890  |
| H | 2.00173757  | 2.96480150  | 0.60792637  |
| H | 1.41090519  | 1.83565959  | 1.83454006  |
| H | 3.06712535  | 2.44567567  | 1.91511453  |
| H | 0.28897632  | 1.98127946  | -0.25664047 |
| N | 4.03275115  | 0.98982673  | 0.11265574  |
| C | -2.15387293 | 2.41245913  | -0.39239207 |
| H | -1.43979168 | 3.20361428  | -0.19084534 |
| C | -3.37511514 | 2.81666197  | -0.79398123 |
| H | -4.18397629 | 2.15571918  | -1.05888260 |
| H | -3.57842775 | 3.87601157  | -0.87609351 |
| C | 4.72898685  | -0.01390509 | -0.62628832 |
| H | 5.71097156  | 0.27255686  | -0.96350175 |
| H | 4.57949411  | 1.75999003  | 0.45303884  |
| C | -3.64662137 | -0.01903653 | 0.75493754  |
| H | -3.37125569 | 0.45669966  | 1.69551335  |
| H | -4.40608298 | 0.60003884  | 0.28780714  |
| H | -4.11943697 | -0.97231088 | 0.98551231  |
| C | -2.94466567 | -0.52190722 | -1.60219762 |
| H | -3.68804794 | -1.31822083 | -1.59053888 |
| H | -3.41886241 | 0.35690885  | -2.03269507 |
| H | -2.14464823 | -0.81461016 | -2.28284598 |
| C | -2.20163717 | -2.79642499 | 0.09770509  |
| H | -1.61650999 | -3.57879024 | 0.58563034  |
| H | -3.21311996 | -2.85861550 | 0.49690604  |
| H | -2.24327019 | -3.03663790 | -0.96420959 |
| C | -1.31327863 | -1.31695954 | 1.88719224  |
| H | -2.22163551 | -1.52955616 | 2.44848044  |
| H | -0.56724084 | -2.05129624 | 2.20039987  |
| H | -0.96139260 | -0.33123680 | 2.19414665  |

**4b- $E_{in}$** 

|   |             |             |             |
|---|-------------|-------------|-------------|
| C | -2.92499303 | -0.71087951 | -0.44747687 |
| C | -1.92166479 | 0.33174399  | -0.20964392 |
| C | -2.47701376 | 1.71593307  | 0.12918481  |
| C | -0.56748452 | 0.11035935  | -0.30703198 |
| C | 0.36438367  | 1.23280920  | -0.28774873 |
| C | 0.10823832  | -1.23376810 | -0.42060360 |
| C | 1.72161947  | 1.12560840  | -0.21287476 |
| C | 1.39377886  | -1.31488237 | 0.43498970  |
| H | -0.54314650 | -2.03719119 | -0.09389496 |
| H | 0.35118973  | -1.41839455 | -1.46852437 |
| C | 2.43547864  | -0.22791447 | -0.03780460 |
| H | -0.04399566 | 2.22325190  | -0.41112198 |
| H | -2.61570656 | 2.32164464  | -0.77287919 |
| H | -1.76585120 | 2.24868545  | 0.75237964  |
| C | -2.73889687 | -1.93767397 | -1.30452625 |
| H | -1.98052170 | -1.77385255 | -2.06144971 |
| H | -2.44901121 | -2.79188839 | -0.69428496 |
| H | -3.67783310 | -2.17923748 | -1.80276314 |
| N | -4.12161878 | -0.54651518 | 0.03714104  |
| C | 2.44102764  | 2.42015999  | -0.33356447 |
| H | 1.78917248  | 3.27869091  | -0.21732277 |
| C | 3.72958919  | 2.69522311  | -0.61693885 |
| H | 4.49212927  | 1.95333367  | -0.78914816 |
| H | 4.04266771  | 3.72775137  | -0.69513617 |
| C | -4.54870332 | 0.55898890  | 0.83209720  |
| H | -5.49798547 | 0.42347110  | 1.32250722  |
| C | -3.78048586 | 1.64726476  | 0.87705094  |
| H | -4.10831984 | 2.50503910  | 1.44631739  |
| H | -4.81546399 | -1.23771618 | -0.18315422 |
| C | 3.56403668  | -0.10243031 | 1.01138345  |
| H | 4.42487866  | 0.42534351  | 0.61319602  |
| H | 3.23917000  | 0.43065133  | 1.90407132  |
| H | 3.91478466  | -1.08739488 | 1.31556370  |
| C | 3.06886443  | -0.61907099 | -1.39401939 |
| H | 3.66974214  | 0.19583484  | -1.79057327 |
| H | 3.72543660  | -1.48145040 | -1.28294747 |
| H | 2.32154014  | -0.85668792 | -2.15186923 |
| C | 1.93042603  | -2.74982799 | 0.27271293  |
| H | 1.22724962  | -3.45653728 | 0.71917247  |
| H | 2.05615650  | -3.03157527 | -0.77240629 |
| H | 2.88585470  | -2.89177429 | 0.77564931  |
| C | 1.00772302  | -1.13022108 | 1.91843325  |
| H | 0.16475400  | -1.77994434 | 2.16761744  |
| H | 1.82696137  | -1.40927869 | 2.57890219  |
| H | 0.72250663  | -0.10637311 | 2.16087931  |

**4b-Z<sub>out</sub>**

|   |             |             |             |
|---|-------------|-------------|-------------|
| C | -2.76619512 | 0.96786627  | 0.40390325  |
| C | -1.97151335 | -0.19547506 | -0.00374409 |
| C | -2.76276552 | -1.47537592 | -0.27329504 |
| C | -0.60175134 | -0.17364325 | -0.12132912 |
| C | 0.21407887  | 1.03396620  | -0.16271197 |
| C | 0.17941090  | -1.44553790 | -0.34031649 |
| C | 1.57607088  | 1.05317947  | -0.22746682 |
| C | 1.55201948  | -1.42507579 | 0.36664652  |
| C | 2.42857492  | -0.22934204 | -0.17320688 |
| H | -0.28735398 | 1.98273013  | -0.25107405 |
| H | -2.85044282 | -2.08825465 | 0.63037118  |
| H | -2.23626222 | -2.08113563 | -1.00436238 |
| C | -2.27489981 | 2.12245151  | 1.24067305  |
| H | -1.41680144 | 1.83564687  | 1.83808337  |
| H | -1.99766563 | 2.96304655  | 0.60512523  |
| H | -3.07143338 | 2.45154477  | 1.90825257  |
| C | 2.15556989  | 2.41250677  | -0.38897882 |
| H | 1.44314929  | 3.20396712  | -0.18309889 |
| C | 3.37576866  | 2.81585572  | -0.79448797 |
| H | 4.18239240  | 2.15419179  | -1.06417030 |
| H | 3.58042366  | 3.87502621  | -0.87535841 |
| C | -4.14095424 | -1.19718006 | -0.80917021 |
| H | -4.67095876 | -1.97788412 | -1.33541554 |
| C | -4.73021736 | -0.01576447 | -0.62520649 |
| N | -4.03428249 | 0.98864795  | 0.11287848  |
| H | -4.58144269 | 1.75835447  | 0.45362312  |
| H | -5.71419317 | 0.26843014  | -0.95843998 |
| C | 1.31434231  | -1.31508673 | 1.88869248  |
| H | 0.56886338  | -2.04944255 | 2.20319297  |
| H | 2.22318438  | -1.52651083 | 2.44960434  |
| H | 0.96211035  | -0.32923290 | 2.19480732  |
| C | 2.20070307  | -2.79641769 | 0.09957629  |
| H | 2.24244591  | -3.03674643 | -0.96229899 |
| H | 3.21199146  | -2.85945536 | 0.49909992  |
| H | 1.61483605  | -3.57827791 | 0.58742828  |
| C | 3.64865429  | -0.02053723 | 0.75284085  |
| H | 4.40771618  | 0.59812646  | 0.28445678  |
| H | 3.37569361  | 0.45491760  | 1.69425375  |
| H | 4.12111263  | -0.97435739 | 0.98187015  |
| C | 2.94227135  | -0.52235382 | -1.60296946 |
| H | 3.68517371  | -1.31914803 | -1.59268006 |
| H | 2.14101108  | -0.81436554 | -2.28241652 |
| H | 3.41644592  | 0.35616883  | -2.03403220 |
| H | 0.30827808  | -1.58868933 | -1.41581956 |
| H | -0.37002338 | -2.30849421 | 0.02688934  |

**4c- $E_{out}$** 

|    |             |             |             |
|----|-------------|-------------|-------------|
| C  | 3.33790456  | -0.66352840 | -0.58941033 |
| C  | 2.41214187  | 0.44155090  | -0.29768809 |
| C  | 3.07990589  | 1.76795283  | 0.05111948  |
| C  | 1.05539184  | 0.30825019  | -0.33543437 |
| C  | 0.18969231  | 1.47722159  | -0.22123275 |
| C  | 0.31921367  | -1.00240129 | -0.47959658 |
| C  | -1.15849050 | 1.46234427  | -0.11345253 |
| C  | -0.94660696 | -1.01194982 | 0.37526606  |
| H  | 0.02836347  | -1.16251353 | -1.50840797 |
| H  | 0.90541365  | -1.84039594 | -0.15561419 |
| C  | -1.90890096 | 0.13861839  | -0.04217361 |
| H  | 0.64379305  | 2.44128102  | -0.30047902 |
| H  | 2.42639904  | 2.34829930  | 0.67961146  |
| H  | 3.26507598  | 2.36116564  | -0.84101941 |
| C  | 3.05275276  | -1.83468784 | -1.49204139 |
| H  | 2.70392277  | -2.68209480 | -0.91793453 |
| H  | 2.31134552  | -1.58464547 | -2.23112775 |
| H  | 3.95916027  | -2.12778802 | -2.00431561 |
| N  | 4.53596912  | -0.60253049 | -0.10926011 |
| C  | -1.85195957 | 2.76408538  | -0.16147125 |
| H  | -1.19884178 | 3.59564410  | 0.02883793  |
| C  | -3.12431919 | 3.03219186  | -0.47556327 |
| H  | -3.85269821 | 2.28466192  | -0.70693012 |
| H  | -3.45302407 | 4.05234846  | -0.50710478 |
| C  | 5.04825668  | 0.44045313  | 0.71675863  |
| H  | 5.97674427  | 0.21774520  | 1.19546877  |
| C  | 4.37357750  | 1.57797729  | 0.79043503  |
| H  | 4.76298780  | 2.38751480  | 1.37394492  |
| H  | 5.17302488  | -1.33058346 | -0.35525056 |
| Cl | -3.28254907 | 0.19650405  | 1.07438196  |
| Cl | -2.53303060 | -0.19016196 | -1.69462692 |
| Cl | -1.71049019 | -2.60257946 | 0.22019383  |
| Cl | -0.45426981 | -0.80977085 | 2.08578909  |

**4c-Z<sub>in</sub>**

|    |             |             |             |
|----|-------------|-------------|-------------|
| C  | 4.48457362  | -1.25121347 | -0.99708048 |
| C  | 3.12055851  | -1.47238847 | -0.40672182 |
| C  | 2.42405398  | -0.15954576 | -0.06841517 |
| C  | 3.31437920  | 0.91396590  | 0.39744870  |
| H  | 4.93107861  | -2.02639812 | -1.58631306 |
| H  | 2.53366186  | -2.02511206 | -1.12118255 |
| H  | 3.21293047  | -2.10445043 | 0.47336300  |
| C  | 1.07220208  | -0.02220937 | -0.16616907 |
| C  | 0.35578491  | 1.24563236  | -0.10639996 |
| C  | 0.20449205  | -1.22522842 | -0.45100317 |
| C  | -0.98733058 | 1.39750888  | -0.15046889 |
| C  | -1.14250339 | -1.09957347 | 0.25480946  |
| H  | 0.03022389  | -1.31882836 | -1.51483110 |
| H  | 0.65557791  | -2.13703638 | -0.10314574 |
| C  | -1.89940302 | 0.17830413  | -0.21247557 |
| C  | 2.93123440  | 2.01829241  | 1.34686407  |
| H  | 2.71096677  | 2.92644299  | 0.80142119  |
| H  | 2.07162246  | 1.74463059  | 1.93392576  |
| H  | 3.75704239  | 2.22222732  | 2.01541097  |
| H  | 0.92606875  | 2.14758435  | -0.12797927 |
| N  | 4.55963184  | 0.86602253  | 0.05617289  |
| C  | -1.50530388 | 2.77724479  | -0.23575729 |
| H  | -0.78097197 | 3.51740761  | 0.05144225  |
| C  | -2.69150718 | 3.21060009  | -0.67642415 |
| H  | -3.47660355 | 2.56589929  | -1.00897940 |
| H  | -2.88553499 | 4.26465967  | -0.71001602 |
| C  | 5.15267244  | -0.12816776 | -0.77761809 |
| H  | 6.12823104  | 0.11393772  | -1.13901588 |
| H  | 5.17235312  | 1.56022158  | 0.42950282  |
| Cl | -3.37035316 | 0.38613891  | 0.75272416  |
| Cl | -2.37111683 | -0.01986332 | -1.93393570 |
| Cl | -0.82381391 | -1.00567593 | 2.01830158  |
| Cl | -2.07865687 | -2.57033784 | -0.04465150 |

**4c- $E_{in}$** 

|    |             |             |             |
|----|-------------|-------------|-------------|
| C  | -3.34867773 | -0.70633811 | -0.55689441 |
| C  | -2.43580348 | 0.41074854  | -0.27135244 |
| C  | -3.11746291 | 1.73452047  | 0.06083786  |
| C  | -1.07741605 | 0.29117391  | -0.30118371 |
| C  | -0.22527463 | 1.47078406  | -0.19590581 |
| C  | -0.32650112 | -1.01305559 | -0.42712845 |
| C  | 1.12270041  | 1.47223611  | -0.08485080 |
| C  | 0.93727243  | -0.99853501 | 0.43067655  |
| H  | -0.90452622 | -1.85309425 | -0.09381471 |
| H  | -0.03140771 | -1.18312582 | -1.45311599 |
| C  | 1.88770997  | 0.15791287  | 0.00259353  |
| H  | -0.68986085 | 2.42882909  | -0.28640811 |
| H  | -3.29730263 | 2.32004586  | -0.83741417 |
| H  | -2.47477279 | 2.32406004  | 0.69204102  |
| C  | -3.04473958 | -1.88643421 | -1.44157116 |
| H  | -2.30015233 | -1.63894796 | -2.17825701 |
| H  | -2.69202255 | -2.72253492 | -0.85341591 |
| H  | -3.94412886 | -2.19542073 | -1.95685645 |
| N  | -4.55167287 | -0.65075219 | -0.08841929 |
| C  | 1.80161357  | 2.78121357  | -0.14404191 |
| H  | 1.13943818  | 3.60708368  | 0.03961947  |
| C  | 3.07086223  | 3.06036999  | -0.46097864 |
| H  | 3.80706042  | 2.31867133  | -0.68637192 |
| H  | 3.38865930  | 4.08366869  | -0.50126858 |
| C  | -5.08168580 | 0.39726095  | 0.71970874  |
| H  | -6.01324739 | 0.17201998  | 1.19119866  |
| C  | -4.41746333 | 1.54121033  | 0.78785439  |
| H  | -4.81997778 | 2.35374488  | 1.35815833  |
| H  | -5.17921927 | -1.38824943 | -0.33060445 |
| Cl | 3.25792720  | 0.24378564  | 1.12143058  |
| Cl | 2.51920356  | -0.18228325 | -1.64458189 |
| Cl | 1.71918493  | -2.58220690 | 0.29512035  |
| Cl | 0.43861966  | -0.78275361 | 2.13745833  |



**4c-Z<sub>out</sub>**

|    |             |             |             |
|----|-------------|-------------|-------------|
| C  | -3.31457268 | 0.91415581  | 0.39692408  |
| C  | -2.42411121 | -0.15914477 | -0.06913349 |
| C  | -3.12015259 | -1.47222499 | -0.40766019 |
| C  | -1.07221991 | -0.02177711 | -0.16676740 |
| C  | -0.35556445 | 1.24588711  | -0.10654189 |
| C  | -0.20457851 | -1.22485849 | -0.45164337 |
| C  | 0.98760502  | 1.39752981  | -0.15009319 |
| C  | 1.14223943  | -1.09961975 | 0.25457029  |
| H  | -0.65588368 | -2.13670754 | -0.10418234 |
| H  | -0.03004079 | -1.31820760 | -1.51545226 |
| C  | 1.89950295  | 0.17819884  | -0.21216462 |
| H  | -0.92559369 | 2.14797907  | -0.12808610 |
| H  | -3.21082996 | -2.10507036 | 0.47202779  |
| H  | -2.53368354 | -2.02388932 | -1.12330342 |
| C  | -2.93130216 | 2.01934638  | 1.34527650  |
| H  | -2.07193844 | 1.74602591  | 1.93287380  |
| H  | -2.71054697 | 2.92681025  | 0.79889315  |
| H  | -3.75720374 | 2.22435405  | 2.01336887  |
| C  | 1.50581257  | 2.77718624  | -0.23509418 |
| H  | 0.78152269  | 3.51744982  | 0.05194841  |
| C  | 2.69222304  | 3.21039644  | -0.67534347 |
| H  | 3.47735775  | 2.56559965  | -1.00761733 |
| H  | 2.88645091  | 4.26442542  | -0.70873388 |
| C  | -4.48509988 | -1.25198982 | -0.99604719 |
| H  | -4.93199580 | -2.02766648 | -1.58433117 |
| C  | -5.15365904 | -0.12939669 | -0.77578108 |
| N  | -4.56016512 | 0.86534962  | 0.05695523  |
| H  | -5.17283041 | 1.55940904  | 0.43061201  |
| H  | -6.13006390 | 0.11178587  | -1.13549216 |
| Cl | 3.37027357  | 0.38542525  | 0.75343153  |
| Cl | 2.37158308  | -0.01957507 | -1.93356411 |
| Cl | 0.82307665  | -1.00599183 | 2.01798977  |
| Cl | 2.07814781  | -2.57050274 | -0.04503558 |

**4d- $E_{out}$** 

|    |             |             |             |
|----|-------------|-------------|-------------|
| C  | -3.93661520 | -0.50903331 | 0.80500388  |
| C  | -3.07501667 | 0.57639040  | 0.31556864  |
| C  | -3.80539800 | 1.80691641  | -0.21736822 |
| C  | -1.71087983 | 0.52027939  | 0.33185663  |
| C  | -0.92168400 | 1.70282043  | 0.01196346  |
| C  | -0.89659350 | -0.70892121 | 0.65884676  |
| C  | 0.42707279  | 1.76223275  | -0.09298148 |
| C  | 0.39093538  | -0.76400250 | -0.16623759 |
| H  | -0.62135319 | -0.70803052 | 1.70448023  |
| H  | -1.43066263 | -1.61449693 | 0.44988692  |
| C  | 1.26123070  | 0.50182045  | 0.06122286  |
| H  | -1.43734094 | 2.63417668  | -0.07707160 |
| H  | -3.22553690 | 2.25433708  | -1.00805872 |
| H  | -3.91767028 | 2.56609305  | 0.55304163  |
| C  | -3.55129212 | -1.55436867 | 1.81743102  |
| H  | -3.15798149 | -2.43363045 | 1.32633682  |
| H  | -2.81171029 | -1.17797537 | 2.50304087  |
| H  | -4.42258265 | -1.85022995 | 2.38558555  |
| N  | -5.16528978 | -0.54444249 | 0.40723819  |
| C  | 1.01052459  | 3.10805241  | -0.27681786 |
| H  | 0.30483205  | 3.81913368  | -0.66482220 |
| C  | 2.22914759  | 3.55732750  | 0.04117075  |
| H  | 3.00291062  | 2.94756997  | 0.45588696  |
| H  | 2.46544660  | 4.59057750  | -0.12174246 |
| C  | -5.77795162 | 0.37342532  | -0.49716272 |
| H  | -6.73830691 | 0.07284438  | -0.85584438 |
| C  | -5.15707329 | 1.48741252  | -0.78015783 |
| H  | -5.62398242 | 2.20084029  | -1.42969889 |
| H  | -5.75405128 | -1.25703290 | 0.78304878  |
| Br | 1.91085765  | 0.52323122  | 1.98423324  |
| Br | 2.82726388  | 0.46861007  | -1.08083986 |
| Br | 1.30714168  | -2.41402882 | 0.28911580  |
| Br | -0.13235358 | -0.89790235 | -2.05715714 |

**4d-Z<sub>in</sub>**

|    |             |             |             |
|----|-------------|-------------|-------------|
| C  | -5.06177701 | -1.09390592 | 1.32303246  |
| C  | -3.68849694 | -1.31700987 | 0.76183537  |
| C  | -3.08540241 | -0.04174041 | 0.18398124  |
| C  | -4.05176456 | 0.89054448  | -0.41429441 |
| H  | -5.44978825 | -1.79438806 | 2.03548820  |
| H  | -3.06353105 | -1.69012824 | 1.55667922  |
| H  | -3.73838113 | -2.10567709 | 0.01440045  |
| C  | -1.74043866 | 0.17681841  | 0.20595606  |
| C  | -1.09498486 | 1.44823308  | -0.08673387 |
| C  | -0.80560881 | -0.92119550 | 0.65648667  |
| C  | 0.23907911  | 1.67891030  | -0.09074918 |
| C  | 0.53634916  | -0.83691386 | -0.07049656 |
| H  | -0.62802645 | -0.84135915 | 1.72139822  |
| H  | -1.21446678 | -1.89564176 | 0.46028517  |
| C  | 1.21511809  | 0.54100891  | 0.16008549  |
| C  | -3.76150215 | 1.85945990  | -1.52938725 |
| H  | -3.56851236 | 2.84693013  | -1.13135600 |
| H  | -2.91079454 | 1.54175741  | -2.10745597 |
| H  | -4.62045500 | 1.92557326  | -2.18367579 |
| H  | -1.71301024 | 2.30869971  | -0.21224831 |
| N  | -5.28331972 | 0.81874192  | -0.03225923 |
| C  | 0.65763469  | 3.08736887  | -0.25681016 |
| H  | -0.10680837 | 3.70013391  | -0.69841224 |
| C  | 1.78746006  | 3.69344336  | 0.12278642  |
| H  | 2.60714125  | 3.19301287  | 0.59157462  |
| H  | 1.89817097  | 4.74687658  | -0.04469883 |
| C  | -5.79539614 | -0.07643454 | 0.95591493  |
| H  | -6.78051232 | 0.15349258  | 1.29917525  |
| H  | -5.94787002 | 1.40878619  | -0.48674864 |
| Br | 2.84409736  | 0.68542657  | -0.88114308 |
| Br | 1.72429839  | 0.70503685  | 2.11759078  |
| Br | 0.16687553  | -1.09778456 | -1.98830116 |
| Br | 1.62652013  | -2.33387631 | 0.50457315  |

**4d- $E_{in}$** 

|    |             |             |             |
|----|-------------|-------------|-------------|
| C  | 3.93618366  | -0.50961130 | 0.80437134  |
| C  | 3.07451971  | 0.57656977  | 0.31510653  |
| C  | 3.80592312  | 1.80721544  | -0.21591712 |
| C  | 1.71057593  | 0.52049638  | 0.33092629  |
| C  | 0.92107217  | 1.70324102  | 0.01167651  |
| C  | 0.89667070  | -0.70924076 | 0.65786268  |
| C  | -0.42758115 | 1.76200577  | -0.09311019 |
| C  | -0.39084882 | -0.76415166 | -0.16718809 |
| H  | 1.43111685  | -1.61494374 | 0.44946477  |
| H  | 0.62084242  | -0.70713446 | 1.70320430  |
| C  | -1.26139521 | 0.50139636  | 0.06102471  |
| H  | 1.43653752  | 2.63467896  | -0.07803679 |
| H  | 3.91925100  | 2.56490899  | 0.55570942  |
| H  | 3.22630464  | 2.25648695  | -1.00563150 |
| C  | 3.55160396  | -1.55276032 | 1.81940285  |
| H  | 2.81381268  | -1.17394259 | 2.50566471  |
| H  | 3.15609383  | -2.43239257 | 1.33085884  |
| H  | 4.42360777  | -1.84874750 | 2.38640867  |
| N  | 5.16389510  | -0.54649106 | 0.40428734  |
| C  | -1.01099272 | 3.10739060  | -0.27765681 |
| H  | -0.30479584 | 3.81899881  | -0.66377467 |
| C  | -2.22938576 | 3.55681278  | 0.04120027  |
| H  | -3.00268536 | 2.94679399  | 0.45638953  |
| H  | -2.46535875 | 4.59048641  | -0.11945936 |
| C  | 5.77695807  | 0.37225889  | -0.49957772 |
| H  | 6.73670959  | 0.07091842  | -0.85907665 |
| C  | 5.15705759  | 1.48743905  | -0.77989773 |
| H  | 5.62411590  | 2.20177108  | -1.42834416 |
| H  | 5.75366309  | -1.25701520 | 0.78251186  |
| Br | -1.30753197 | -2.41416961 | 0.28788325  |
| Br | 0.13525481  | -0.89896969 | -2.05794511 |
| Br | -2.82608122 | 0.46805022  | -1.08201948 |
| Br | -1.91267531 | 0.52409953  | 1.98496554  |

**4d-Z<sub>out</sub>**

|    |             |             |             |
|----|-------------|-------------|-------------|
| C  | 4.05413874  | 0.89223812  | -0.41113601 |
| C  | 3.08626787  | -0.03709361 | 0.18871123  |
| C  | 3.68423487  | -1.31315585 | 0.77117595  |
| C  | 1.74082105  | 0.18109229  | 0.20692906  |
| C  | 1.09323524  | 1.45064264  | -0.08851346 |
| C  | 0.80729211  | -0.91764042 | 0.65766040  |
| C  | -0.24139735 | 1.67901842  | -0.09338198 |
| C  | -0.53425768 | -0.83701226 | -0.06967770 |
| H  | 1.21794237  | -1.89147871 | 0.46261407  |
| H  | 0.62886716  | -0.83700587 | 1.72230709  |
| C  | -1.21546063 | 0.54002695  | 0.15832180  |
| H  | 1.70944299  | 2.31209069  | -0.21477922 |
| H  | 3.71683065  | -2.10907118 | 0.03045510  |
| H  | 3.06430269  | -1.67235794 | 1.57668984  |
| C  | 3.76334434  | 1.86746450  | -1.52051749 |
| H  | 2.91602672  | 1.54967169  | -2.10361314 |
| H  | 3.56439852  | 2.85120656  | -1.11651316 |
| H  | 4.62401001  | 1.94216134  | -2.17159648 |
| C  | -0.66237834 | 3.08671961  | -0.25984723 |
| H  | 0.10324653  | 3.70151625  | -0.69655550 |
| C  | -1.79449874 | 3.69093517  | 0.11624555  |
| H  | -2.61552193 | 3.18891930  | 0.58091214  |
| H  | -1.90509881 | 4.74470662  | -0.04918952 |
| C  | 5.06571336  | -1.10168027 | 1.31558521  |
| H  | 5.45653440  | -1.80732790 | 2.02139896  |
| C  | 5.80285987  | -0.08861107 | 0.94364538  |
| N  | 5.28751263  | 0.81393435  | -0.03592392 |
| H  | 5.95188585  | 1.40196874  | -0.49316548 |
| H  | 6.79337957  | 0.13253282  | 1.27715708  |
| Br | -2.84258392 | 0.67974480  | -0.88604369 |
| Br | -1.72841764 | 0.70645750  | 2.11570808  |
| Br | -1.62197624 | -2.33456818 | 0.50811270  |
| Br | -0.16259320 | -1.10184514 | -1.98670263 |

**Cartesian coordinates (in Å) for MP2  $S_0$  equilibrium geometries of motors 1a–4d**

---

**1a- $E_{out}$**

|   |             |             |             |
|---|-------------|-------------|-------------|
| C | -3.00735300 | -1.23102300 | 0.27801400  |
| C | -1.80515200 | 0.74820300  | -0.07111000 |
| C | -0.81119400 | -0.28020400 | -0.02853900 |
| C | -1.54448100 | -1.61229300 | 0.01286100  |
| C | 0.55236700  | -0.14276200 | -0.07965800 |
| C | 1.36225000  | -1.33328600 | -0.17408900 |
| C | 1.28738100  | 1.16928400  | -0.09568800 |
| C | 2.71411400  | -1.28663300 | -0.21739000 |
| C | 2.64270400  | 1.05072400  | 0.59944000  |
| H | 1.44645400  | 1.45876100  | -1.14103500 |
| H | 0.70541200  | 1.95490200  | 0.37380700  |
| C | 3.49169500  | -0.02648200 | -0.05686200 |
| H | 3.15089700  | 2.01293200  | 0.57234500  |
| H | 2.48386000  | 0.79333400  | 1.64830300  |
| H | 4.39375800  | -0.22571200 | 0.52166000  |
| H | 3.83531500  | 0.30242900  | -1.04440300 |
| H | -3.71500400 | -1.70756000 | -0.39392000 |
| H | 3.25747100  | -2.21101300 | -0.37347000 |
| H | 0.87235600  | -2.29227000 | -0.26634500 |
| H | -1.16119800 | -2.26676600 | 0.79079600  |
| H | -1.44803700 | -2.12908100 | -0.94203900 |
| H | -3.31250100 | -1.41740500 | 1.30619400  |
| H | -3.84129200 | 0.77881000  | 0.02826700  |
| C | -1.67492800 | 2.21793900  | -0.25281300 |
| H | -1.27382300 | 2.66995200  | 0.65357600  |
| H | -0.99748400 | 2.44543500  | -1.07101200 |
| H | -2.64457500 | 2.66550100  | -0.45812700 |
| N | -2.99943200 | 0.21813600  | 0.04434300  |

**1a-Z<sub>in</sub>**

|   |             |             |             |
|---|-------------|-------------|-------------|
| C | 3.00493700  | -1.24265900 | -0.17734300 |
| C | 1.51897100  | -1.59670300 | -0.02814200 |
| C | 0.80936600  | -0.25206200 | -0.03803600 |
| C | 1.81701500  | 0.75837400  | 0.08336700  |
| H | 3.64962000  | -1.73373000 | 0.54551200  |
| H | 3.38555100  | -1.43184900 | -1.17949700 |
| H | 1.18384100  | -2.24345300 | -0.83437400 |
| H | 1.34006200  | -2.11496800 | 0.91404400  |
| C | -0.55110400 | -0.09466800 | -0.10517700 |
| C | -1.22992400 | 1.17404100  | -0.22187400 |
| C | -1.42233800 | -1.31905300 | -0.13986100 |
| C | -2.57996400 | 1.25916700  | -0.25612400 |
| C | -2.75490600 | -1.07686200 | 0.56330400  |
| H | -1.60672700 | -1.56890500 | -1.19175700 |
| H | -0.90609300 | -2.16972500 | 0.30095300  |
| C | -3.48764500 | 0.09186500  | -0.07655100 |
| H | -3.36011900 | -1.98063400 | 0.52535100  |
| H | -2.56777100 | -0.85289300 | 1.61519200  |
| H | -4.35165500 | 0.39048800  | 0.51732100  |
| H | -3.88373800 | -0.19330700 | -1.05800300 |
| H | 3.85422800  | 0.75037400  | 0.14736400  |
| H | -3.02662100 | 2.23144400  | -0.42768400 |
| C | 1.69668900  | 2.22887800  | 0.25781300  |
| H | 1.34831200  | 2.68381600  | -0.66890100 |
| H | 0.97908700  | 2.46106800  | 1.04074400  |
| H | 2.65870200  | 2.66620500  | 0.51404300  |
| H | -0.66362100 | 2.08089900  | -0.35101300 |
| N | 3.00576600  | 0.20618100  | 0.06035000  |

**1a- $E_{in}$** 

|   |             |             |             |
|---|-------------|-------------|-------------|
| C | 3.00740500  | -1.23098900 | 0.27800300  |
| C | 1.80516400  | 0.74822600  | -0.07105700 |
| C | 0.81123700  | -0.28023800 | -0.02861200 |
| C | 1.54457700  | -1.61229000 | 0.01274900  |
| C | -0.55230600 | -0.14274800 | -0.07940000 |
| C | -1.36217300 | -1.33326600 | -0.17396000 |
| C | -1.28731400 | 1.16930100  | -0.09567100 |
| C | -2.71402000 | -1.28666100 | -0.21757200 |
| C | -2.64275300 | 1.05079100  | 0.59912000  |
| H | -0.70552900 | 1.95487700  | 0.37413400  |
| H | -1.44587100 | 1.45885800  | -1.14105600 |
| C | -3.49177400 | -0.02667600 | -0.05665000 |
| H | -3.83646500 | 0.30184900  | -1.04390700 |
| H | -4.39324300 | -0.22618000 | 0.52272700  |
| H | 3.31255500  | -1.41748800 | 1.30613800  |
| H | -3.25730400 | -2.21100300 | -0.37406000 |
| H | -0.87222300 | -2.29220300 | -0.26632600 |
| H | 1.44821200  | -2.12903400 | -0.94216800 |
| H | 1.16127400  | -2.26680400 | 0.79062500  |
| H | 3.71508800  | -1.70730300 | -0.39403100 |
| H | 3.84130900  | 0.77889200  | 0.02818800  |
| C | 1.67466700  | 2.21790900  | -0.25293000 |
| H | 0.99670100  | 2.44515600  | -1.07074000 |
| H | 1.27405100  | 2.67000300  | 0.65362200  |
| H | 2.64412800  | 2.66556500  | -0.45885600 |
| H | -3.15094500 | 2.01297700  | 0.57168200  |
| H | -2.48399600 | 0.79382200  | 1.64809100  |
| N | 2.99942900  | 0.21826700  | 0.04454200  |



**1a-Z<sub>out</sub>**

|   |             |             |             |
|---|-------------|-------------|-------------|
| C | -3.00516500 | -1.24227600 | -0.17712300 |
| C | -1.81674700 | 0.75845100  | 0.08356500  |
| C | -0.80935600 | -0.25218100 | -0.03845200 |
| C | -1.51920700 | -1.59667800 | -0.02847600 |
| C | 0.55108500  | -0.09491400 | -0.10603000 |
| C | 1.22991800  | 1.17377700  | -0.22342700 |
| C | 1.42242300  | -1.31917100 | -0.14044100 |
| C | 2.57996800  | 1.25895300  | -0.25653500 |
| C | 2.75424800  | -1.07676700 | 0.56419200  |
| H | 0.90593800  | -2.17017100 | 0.29944600  |
| H | 1.60814200  | -1.56847400 | -1.19223100 |
| C | 3.48754300  | 0.09180100  | -0.07533200 |
| H | 3.88455200  | -0.19387600 | -1.05628800 |
| H | 4.35099400  | 0.39074300  | 0.51918200  |
| H | -3.38621800 | -1.43137000 | -1.17913500 |
| H | 3.02675400  | 2.23109400  | -0.42856000 |
| H | 0.66358000  | 2.08040400  | -0.35413700 |
| H | -1.34012200 | -2.11522000 | 0.91352500  |
| H | -1.18444300 | -2.24330700 | -0.83496800 |
| H | -3.64968400 | -1.73328700 | 0.54593900  |
| H | -3.85394500 | 0.75082600  | 0.14829200  |
| C | -1.69602000 | 2.22886200  | 0.25851400  |
| H | -0.97697800 | 2.46067200  | 1.04022200  |
| H | -1.34934900 | 2.68424000  | -0.66864500 |
| H | -2.65756700 | 2.66608400  | 0.51670300  |
| H | 3.35955100  | -1.98052200 | 0.52708400  |
| H | 2.56598300  | -0.85254900 | 1.61582800  |
| N | -3.00561700 | 0.20650900  | 0.06071700  |

**1b- $E_{out}$** 

|   |             |             |             |
|---|-------------|-------------|-------------|
| C | -4.07030200 | -1.06443500 | 0.41471800  |
| C | -2.72409400 | 0.75517400  | -0.18621400 |
| C | -1.82600200 | -0.35500900 | -0.11170200 |
| C | -2.67046600 | -1.60375700 | 0.09060800  |
| C | -0.46146800 | -0.35413600 | -0.24851800 |
| C | 0.23524700  | -1.61343000 | -0.27204000 |
| C | 0.39765900  | 0.86104100  | -0.41469900 |
| C | 1.58646000  | -1.67530900 | -0.26858000 |
| C | 1.73863700  | 0.74226500  | 0.33485900  |
| H | 0.59120600  | 0.99832300  | -1.48401500 |
| H | -0.09870100 | 1.75948100  | -0.05913800 |
| C | 2.51013500  | -0.50336900 | -0.18090200 |
| H | -4.86507300 | -1.52725500 | -0.16275200 |
| H | 2.05600100  | -2.65256700 | -0.34037700 |
| H | -0.33237400 | -2.53294100 | -0.31555100 |
| H | -2.29146800 | -2.22783800 | 0.89520700  |
| H | -2.68926100 | -2.20140900 | -0.82095900 |
| H | -4.31374100 | -1.13302300 | 1.47359700  |
| H | -4.73812700 | 0.98695000  | 0.03571500  |
| C | -2.47725100 | 2.18566000  | -0.50808100 |
| H | -1.97745200 | 2.67339000  | 0.32796000  |
| H | -1.83879900 | 2.27769200  | -1.38228400 |
| H | -3.41562100 | 2.70269700  | -0.69545100 |
| N | -3.95066000 | 0.35232500  | 0.04949600  |
| C | 2.51119100  | 2.03753100  | 0.09363400  |
| H | 1.98198800  | 2.87228100  | 0.55569300  |
| H | 3.50427300  | 1.99661000  | 0.53926800  |
| H | 2.62037900  | 2.25699300  | -0.96733800 |
| C | 1.44216600  | 0.62897300  | 1.83354700  |
| H | 2.35187300  | 0.73615300  | 2.42109600  |
| H | 0.76502700  | 1.43031100  | 2.13557800  |
| H | 0.98022800  | -0.32318700 | 2.09513100  |
| C | 3.08716700  | -0.29119700 | -1.59387600 |
| H | 3.90308200  | 0.42964400  | -1.56554800 |
| H | 3.48857100  | -1.23043800 | -1.97425200 |
| H | 2.33531400  | 0.05684600  | -2.30125400 |
| C | 3.67314200  | -0.88986800 | 0.74224300  |
| H | 4.24134200  | -1.70422800 | 0.29242300  |
| H | 4.35369400  | -0.05067000 | 0.88099300  |
| H | 3.32892700  | -1.22090300 | 1.71980700  |

**1b-Z<sub>in</sub>**

|   |             |             |             |
|---|-------------|-------------|-------------|
| C | 3.91520600  | -1.33264100 | -0.27054900 |
| C | 2.39985000  | -1.57710000 | -0.24217400 |
| C | 1.79747900  | -0.18305100 | -0.17069900 |
| C | 2.86681300  | 0.72549400  | 0.10985400  |
| H | 4.47258600  | -1.94033600 | 0.43606500  |
| H | 4.34419100  | -1.45785600 | -1.26325400 |
| H | 2.07016700  | -2.12212900 | -1.12237000 |
| H | 2.12044300  | -2.15766400 | 0.63709100  |
| C | 0.46196300  | 0.09805600  | -0.30025700 |
| C | -0.10875300 | 1.42071700  | -0.32959800 |
| C | -0.51468800 | -1.02113500 | -0.48550400 |
| C | -1.44887100 | 1.60110300  | -0.29934400 |
| C | -1.82136700 | -0.79750200 | 0.29662900  |
| H | -0.73654800 | -1.10240300 | -1.55528800 |
| H | -0.08238300 | -1.97406500 | -0.17911900 |
| C | -2.48012800 | 0.52443100  | -0.18443700 |
| H | 4.88905800  | 0.54543800  | 0.30027900  |
| H | -1.82776700 | 2.61657800  | -0.37733500 |
| C | 2.84050900  | 2.17820000  | 0.41897600  |
| H | 2.61179600  | 2.74390400  | -0.48384300 |
| H | 2.07271200  | 2.39511200  | 1.15735700  |
| H | 3.80512800  | 2.50948800  | 0.79620300  |
| H | 0.52217100  | 2.28995000  | -0.41852500 |
| N | 4.01009800  | 0.08300000  | 0.10818200  |
| C | -2.71782700 | -2.01015100 | 0.05638800  |
| H | -2.25972600 | -2.89748900 | 0.49526600  |
| H | -3.69297000 | -1.88150800 | 0.52476700  |
| H | -2.86914900 | -2.20257200 | -1.00451300 |
| C | -1.48172600 | -0.73574700 | 1.78943300  |
| H | -2.38376600 | -0.76720200 | 2.39746900  |
| H | -0.87469300 | -1.60049900 | 2.06378200  |
| H | -0.92863400 | 0.16650200  | 2.05221600  |
| C | -3.56900900 | 1.01562500  | 0.77852800  |
| H | -4.06829900 | 1.88636500  | 0.35313600  |
| H | -4.32414400 | 0.24580400  | 0.93333700  |
| H | -3.16311100 | 1.30078400  | 1.74685100  |
| C | -3.12147700 | 0.38431100  | -1.57852000 |
| H | -4.00408200 | -0.25157500 | -1.52678300 |
| H | -3.43904700 | 1.36242300  | -1.93981300 |
| H | -2.43245600 | -0.03171400 | -2.31260800 |

**1b- $E_{in}$** 

|   |             |             |             |
|---|-------------|-------------|-------------|
| C | 4.07025900  | -1.06447600 | 0.41473600  |
| C | 2.72409600  | 0.75517300  | -0.18615900 |
| C | 1.82600000  | -0.35501400 | -0.11175100 |
| C | 2.67045900  | -1.60378600 | 0.09048100  |
| C | 0.46146800  | -0.35417000 | -0.24854600 |
| C | -0.23522200 | -1.61346400 | -0.27194700 |
| C | -0.39763900 | 0.86100700  | -0.41482400 |
| C | -1.58644900 | -1.67534600 | -0.26828300 |
| C | -1.73863900 | 0.74235700  | 0.33468500  |
| H | 0.09874500  | 1.75945700  | -0.05932300 |
| H | -0.59110300 | 0.99822100  | -1.48416300 |
| C | -2.51013600 | -0.50341700 | -0.18077500 |
| H | 4.31358200  | -1.13308000 | 1.47364100  |
| H | -2.05595600 | -2.65264500 | -0.33976900 |
| H | 0.33237300  | -2.53299400 | -0.31539100 |
| H | 2.68930300  | -2.20129900 | -0.82117300 |
| H | 2.29140500  | -2.22795700 | 0.89497900  |
| H | 4.86508900  | -1.52729200 | -0.16265200 |
| H | 4.73811600  | 0.98692200  | 0.03580100  |
| C | 2.47733000  | 2.18569600  | -0.50794100 |
| H | 1.83898600  | 2.27781600  | -1.38221500 |
| H | 1.97744700  | 2.67336600  | 0.32808100  |
| H | 3.41574100  | 2.70271300  | -0.69515500 |
| N | 3.95065600  | 0.35228400  | 0.04953300  |
| C | -3.67306500 | -0.88969700 | 0.74250000  |
| H | -4.35360100 | -0.05046800 | 0.88114200  |
| H | -4.24131400 | -1.70413700 | 0.29287800  |
| H | -3.32879200 | -1.22055900 | 1.72010400  |
| C | -3.08726100 | -0.29161300 | -1.59378200 |
| H | -3.48874000 | -1.23093800 | -1.97387600 |
| H | -3.90314900 | 0.42926400  | -1.56559900 |
| H | -2.33543400 | 0.05618400  | -2.30130000 |
| C | -1.44222200 | 0.62934900  | 1.83338600  |
| H | -0.76514800 | 1.43078300  | 2.13532500  |
| H | -2.35195200 | 0.73655500  | 2.42089500  |
| H | -0.98022000 | -0.32274000 | 2.09512500  |
| C | -2.51119900 | 2.03755300  | 0.09319000  |
| H | -1.98205800 | 2.87238800  | 0.55517700  |
| H | -2.62027500 | 2.25686000  | -0.96782300 |
| H | -3.50432100 | 1.99668600  | 0.53873700  |

**1b-Z<sub>out</sub>**

|   |             |             |             |
|---|-------------|-------------|-------------|
| C | -3.91511200 | -1.33273500 | -0.27091900 |
| C | -2.86697000 | 0.72543100  | 0.10989500  |
| C | -1.79750600 | -0.18302000 | -0.17041900 |
| C | -2.39977600 | -1.57713900 | -0.24184200 |
| C | -0.46199500 | 0.09813300  | -0.29995500 |
| C | 0.10877900  | 1.42075900  | -0.32921400 |
| C | 0.51466200  | -1.02107900 | -0.48528000 |
| C | 1.44890000  | 1.60111900  | -0.29920700 |
| C | 1.82144800  | -0.79748000 | 0.29665000  |
| H | 0.08234500  | -1.97397300 | -0.17882000 |
| H | 0.73637600  | -1.10235000 | -1.55509300 |
| C | 2.48018800  | 0.52445200  | -0.18462300 |
| H | -4.34356500 | -1.45779400 | -1.26388000 |
| H | 1.82776800  | 2.61661000  | -0.37713000 |
| H | -0.52211600 | 2.29004600  | -0.41779600 |
| H | -2.12071600 | -2.15741700 | 0.63772800  |
| H | -2.06971300 | -2.12241000 | -1.12173700 |
| H | -4.47285000 | -1.94056900 | 0.43529000  |
| H | -4.88927200 | 0.54523500  | 0.29975000  |
| C | -2.84090000 | 2.17816000  | 0.41894500  |
| H | -2.07348100 | 2.39519900  | 1.15768100  |
| H | -2.61181400 | 2.74381500  | -0.48381200 |
| H | -3.80571300 | 2.50941600  | 0.79570800  |
| N | -4.01021800 | 0.08286000  | 0.10794600  |
| C | 1.48206500  | -0.73557400 | 1.78949600  |
| H | 0.87517100  | -1.60036100 | 2.06404400  |
| H | 2.38422300  | -0.76687000 | 2.39736300  |
| H | 0.92891700  | 0.16664100  | 2.05227400  |
| C | 2.71783900  | -2.01018800 | 0.05637900  |
| H | 2.86896300  | -2.20276200 | -1.00452100 |
| H | 3.69307300  | -1.88151400 | 0.52456400  |
| H | 2.25980200  | -2.89746400 | 0.49544800  |
| C | 3.12126200  | 0.38430600  | -1.57881300 |
| H | 3.43862400  | 1.36243500  | -1.94024500 |
| H | 4.00396700  | -0.25144800 | -1.52720600 |
| H | 2.43217700  | -0.03186600 | -2.31275900 |
| C | 3.56926700  | 1.01560900  | 0.77815500  |
| H | 4.32443000  | 0.24577600  | 0.93276400  |
| H | 4.06846100  | 1.88637400  | 0.35270400  |
| H | 3.16356200  | 1.30071200  | 1.74657600  |

**1c- $E_{\text{out}}$** 

|    |             |             |             |
|----|-------------|-------------|-------------|
| C  | -4.67166400 | -1.02827100 | 0.38044900  |
| C  | -3.26803500 | 0.72389800  | -0.29748600 |
| C  | -2.39746700 | -0.40932200 | -0.14071300 |
| C  | -3.27221300 | -1.61644500 | 0.15343800  |
| C  | -1.03455100 | -0.44808300 | -0.25323400 |
| C  | -0.36073100 | -1.71834300 | -0.13961000 |
| C  | -0.16431900 | 0.74414800  | -0.52530800 |
| C  | 0.98462500  | -1.83018300 | -0.12705200 |
| C  | 1.15995300  | 0.63468000  | 0.22789500  |
| H  | 0.06233600  | 0.80246900  | -1.59345800 |
| H  | -0.62063400 | 1.67621000  | -0.21608300 |
| C  | 1.90155900  | -0.65273600 | -0.19960100 |
| H  | -5.44903500 | -1.49917800 | -0.21429000 |
| H  | 1.46289700  | -2.79993500 | -0.08543800 |
| H  | -0.94654100 | -2.62461600 | -0.07868500 |
| H  | -2.92778500 | -2.16102600 | 1.02857700  |
| H  | -3.27479500 | -2.30197200 | -0.69366600 |
| H  | -4.97119500 | -1.03471800 | 1.42662800  |
| H  | -5.27278000 | 1.01879200  | -0.11088600 |
| C  | -2.97566800 | 2.12576900  | -0.69313500 |
| H  | -2.44944600 | 2.63502600  | 0.11413700  |
| H  | -2.34604500 | 2.15239600  | -1.57868900 |
| H  | -3.89671100 | 2.66704000  | -0.89620100 |
| N  | -4.50143600 | 0.36532600  | -0.04987900 |
| Cl | 2.12625200  | 2.07596700  | -0.08435300 |
| Cl | 2.39081600  | -0.51814500 | -1.91797100 |
| Cl | 0.78290200  | 0.54494000  | 1.97070100  |
| Cl | 3.33125700  | -0.94031700 | 0.79240800  |

**1c-Z<sub>in</sub>**

|    |             |             |             |
|----|-------------|-------------|-------------|
| C  | -4.45128200 | 1.32337900  | -0.43357800 |
| C  | -2.92998600 | 1.52389900  | -0.43459600 |
| C  | -2.36535200 | 0.12720000  | -0.24514100 |
| C  | -3.46429500 | -0.73544400 | 0.09690900  |
| H  | -4.98301600 | 1.98704500  | 0.24194800  |
| H  | -4.89112300 | 1.39860900  | -1.42627200 |
| H  | -2.59180100 | 1.98171700  | -1.36048900 |
| H  | -2.62564100 | 2.16768100  | 0.39111500  |
| C  | -1.03752900 | -0.19033700 | -0.32698300 |
| C  | -0.48896200 | -1.51965700 | -0.21173800 |
| C  | -0.05259400 | 0.90800600  | -0.60731000 |
| C  | 0.84137000  | -1.74412300 | -0.16445500 |
| C  | 1.23181900  | 0.69924200  | 0.18894200  |
| H  | 0.20237500  | 0.91418900  | -1.67099000 |
| H  | -0.44901400 | 1.88577000  | -0.34565400 |
| C  | 1.86502800  | -0.65611000 | -0.20151700 |
| H  | -5.47756000 | -0.48493400 | 0.25585600  |
| H  | 1.23141700  | -2.75271500 | -0.12525800 |
| C  | -3.47750600 | -2.15927100 | 0.51675900  |
| H  | -3.21582500 | -2.79651600 | -0.32755500 |
| H  | -2.75011500 | -2.32522200 | 1.30820900  |
| H  | -4.46372000 | -2.44830400 | 0.87179600  |
| H  | -1.13633700 | -2.38027900 | -0.19522900 |
| N  | -4.58395500 | -0.06307500 | 0.03358900  |
| Cl | 2.33431800  | 2.04222000  | -0.09919400 |
| Cl | 0.78876500  | 0.66102200  | 1.92019400  |
| Cl | 3.22146500  | -1.07039700 | 0.84783800  |
| Cl | 2.43273400  | -0.58379900 | -1.89921100 |

**1c- $E_{in}$** 

|    |             |             |             |
|----|-------------|-------------|-------------|
| C  | 4.67212400  | -1.02829200 | 0.37968200  |
| C  | 3.26814100  | 0.72396700  | -0.29729500 |
| C  | 2.39762100  | -0.40929900 | -0.14032800 |
| C  | 3.27243800  | -1.61636700 | 0.15388100  |
| C  | 1.03468600  | -0.44802800 | -0.25248900 |
| C  | 0.36090900  | -1.71831600 | -0.13845600 |
| C  | 0.16442500  | 0.74412000  | -0.52488900 |
| C  | -0.98443400 | -1.83025100 | -0.12620900 |
| C  | -1.16013200 | 0.63470600  | 0.22772800  |
| H  | 0.62059000  | 1.67621800  | -0.21551200 |
| H  | -0.06164500 | 0.80249800  | -1.59316400 |
| C  | -1.90142300 | -0.65288200 | -0.19946200 |
| H  | 4.97277200  | -1.03510400 | 1.42553600  |
| H  | -1.46266900 | -2.80001000 | -0.08434900 |
| H  | 0.94683700  | -2.62447300 | -0.07702300 |
| H  | 3.27434600  | -2.30239400 | -0.69280800 |
| H  | 2.92847800  | -2.16037600 | 1.02956300  |
| H  | 5.44888000  | -1.49906700 | -0.21597900 |
| H  | 5.27292600  | 1.01888000  | -0.11137900 |
| C  | 2.97552500  | 2.12582700  | -0.69270700 |
| H  | 2.34584500  | 2.15245200  | -1.57822300 |
| H  | 2.44923400  | 2.63487800  | 0.11464800  |
| H  | 3.89644100  | 2.66732100  | -0.89574300 |
| N  | 4.50160700  | 0.36540200  | -0.05010700 |
| Cl | -0.78384900 | 0.54584500  | 1.97075500  |
| Cl | -2.12646800 | 2.07578700  | -0.08557700 |
| Cl | -3.33141200 | -0.94025700 | 0.79218000  |
| Cl | -2.39018600 | -0.51900800 | -1.91803800 |



**1c-Z<sub>out</sub>**

|    |             |             |             |
|----|-------------|-------------|-------------|
| C  | 4.45148400  | 1.32333100  | -0.43424100 |
| C  | 3.46454800  | -0.73529300 | 0.09707500  |
| C  | 2.36555000  | 0.12742900  | -0.24455000 |
| C  | 2.93020500  | 1.52405800  | -0.43431000 |
| C  | 1.03766400  | -0.19001200 | -0.32595000 |
| C  | 0.48921400  | -1.51938700 | -0.21123500 |
| C  | 0.05283300  | 0.90857100  | -0.60571200 |
| C  | -0.84111500 | -1.74404800 | -0.16466000 |
| C  | -1.23214500 | 0.69914200  | 0.18938600  |
| H  | 0.44913100  | 1.88602100  | -0.34265800 |
| H  | -0.20128200 | 0.91599000  | -1.66959700 |
| C  | -1.86485000 | -0.65611800 | -0.20184100 |
| H  | 4.89070000  | 1.39835900  | -1.42722400 |
| H  | -1.23108300 | -2.75269000 | -0.12598800 |
| H  | 1.13671800  | -2.37991700 | -0.19482100 |
| H  | 2.62647900  | 2.16792000  | 0.39156600  |
| H  | 2.59146600  | 1.98189100  | -1.35999900 |
| H  | 4.98373600  | 1.98701900  | 0.24085400  |
| H  | 5.47790800  | -0.48492900 | 0.25514200  |
| C  | 3.47774600  | -2.15900700 | 0.51731600  |
| H  | 2.74996200  | -2.32489200 | 1.30840400  |
| H  | 3.21665600  | -2.79650600 | -0.32700100 |
| H  | 4.46382300  | -2.44778000 | 0.87294600  |
| N  | 4.58425500  | -0.06306200 | 0.03308000  |
| Cl | -3.22197800 | -1.07090200 | 0.84619100  |
| Cl | -2.43129500 | -0.58316600 | -1.90011700 |
| Cl | -2.33463900 | 2.04198100  | -0.09896000 |
| Cl | -0.79037000 | 0.66026100  | 1.92107100  |

**1d- $E_{\text{out}}$** 

|    |             |             |             |
|----|-------------|-------------|-------------|
| C  | 5.38907600  | -0.95557400 | -0.69880300 |
| C  | 3.97799100  | 0.29821900  | 0.69302200  |
| C  | 3.10575800  | -0.61168000 | 0.00597900  |
| C  | 3.97795700  | -1.54968900 | -0.81109000 |
| C  | 1.73931200  | -0.67540800 | 0.05888600  |
| C  | 1.06089100  | -1.72539600 | -0.65522500 |
| C  | 0.86944300  | 0.25495300  | 0.85319200  |
| C  | -0.28699600 | -1.79269500 | -0.74318400 |
| C  | -0.43398200 | 0.54491700  | 0.11057900  |
| H  | 0.61410800  | -0.20947700 | 1.81102000  |
| H  | 1.34395300  | 1.20826200  | 1.04749200  |
| C  | -1.19254100 | -0.76717100 | -0.15419300 |
| H  | 6.14191400  | -1.66850400 | -0.37491100 |
| H  | -0.76694100 | -2.62681800 | -1.23828500 |
| H  | 1.63956100  | -2.50904600 | -1.12374800 |
| H  | 3.65353700  | -1.60028700 | -1.84724700 |
| H  | 3.94874900  | -2.55733500 | -0.39714600 |
| H  | 5.72376000  | -0.47838300 | -1.61775000 |
| H  | 5.98921300  | 0.61256800  | 0.70582000  |
| C  | 3.68425300  | 1.35778200  | 1.69240800  |
| H  | 3.17334300  | 2.18995600  | 1.20810600  |
| H  | 3.04012200  | 0.97594700  | 2.48031800  |
| H  | 4.60377000  | 1.73196300  | 2.13636600  |
| N  | 5.21622400  | 0.07686500  | 0.33062000  |
| Br | -1.47055300 | 1.79887900  | 1.13065500  |
| Br | 0.06037200  | 1.36891200  | -1.58457700 |
| Br | -2.72454600 | -0.51857500 | -1.28704500 |
| Br | -1.77857600 | -1.55997300 | 1.53485900  |

**1d-Z<sub>in</sub>**

|    |             |             |             |
|----|-------------|-------------|-------------|
| C  | -5.17288600 | 0.83080300  | -1.06849500 |
| C  | -3.65311300 | 1.03577200  | -1.12628800 |
| C  | -3.08427800 | -0.15847000 | -0.38157800 |
| C  | -4.18191000 | -0.82192500 | 0.26473200  |
| H  | -5.72287800 | 1.70436000  | -0.73096300 |
| H  | -5.59172400 | 0.48941000  | -2.01333400 |
| H  | -3.29950400 | 1.08802900  | -2.15270300 |
| H  | -3.36895100 | 1.96084200  | -0.62335100 |
| C  | -1.75190900 | -0.46003900 | -0.30023000 |
| C  | -1.19640000 | -1.62060700 | 0.34678200  |
| C  | -0.76778300 | 0.44886600  | -0.97947100 |
| C  | 0.13650100  | -1.78004300 | 0.51000200  |
| C  | 0.49181600  | 0.60570900  | -0.13217800 |
| H  | -0.47961100 | 0.02193700  | -1.94571200 |
| H  | -1.18429400 | 1.43730900  | -1.15482800 |
| C  | 1.14517300  | -0.77058800 | 0.08248000  |
| H  | -6.20019500 | -0.55381500 | 0.28335900  |
| H  | 0.53079600  | -2.68887000 | 0.94566000  |
| C  | -4.19012400 | -1.95220300 | 1.22693500  |
| H  | -3.91350900 | -2.87466700 | 0.71696800  |
| H  | -3.47048100 | -1.77346600 | 2.02276900  |
| H  | -5.17835500 | -2.08340900 | 1.66105100  |
| H  | -1.83436800 | -2.42074000 | 0.68324300  |
| N  | -5.30588500 | -0.24741000 | -0.07969000 |
| Br | -0.08236200 | 1.32966400  | 1.58602700  |
| Br | 1.67638000  | 1.86142600  | -0.96879500 |
| Br | 2.59136600  | -0.71537500 | 1.34716800  |
| Br | 1.82043800  | -1.46767800 | -1.61555600 |

**1d- $E_{in}$** 

|    |             |             |             |
|----|-------------|-------------|-------------|
| C  | -5.38911500 | -0.95582800 | -0.69867700 |
| C  | -3.97809900 | 0.29831700  | 0.69289500  |
| C  | -3.10578000 | -0.61162700 | 0.00594300  |
| C  | -3.97792800 | -1.54974100 | -0.81107200 |
| C  | -1.73933300 | -0.67526000 | 0.05884100  |
| C  | -1.06093000 | -1.72521600 | -0.65539100 |
| C  | -0.86941800 | 0.25501600  | 0.85319900  |
| C  | 0.28695200  | -1.79257800 | -0.74336800 |
| C  | 0.43403000  | 0.54492900  | 0.11065000  |
| H  | -0.61418600 | -0.20948100 | 1.81102600  |
| H  | -1.34385100 | 1.20835400  | 1.04755600  |
| C  | 1.19254600  | -0.76715600 | -0.15424000 |
| H  | -6.14180400 | -1.66882800 | -0.37459100 |
| H  | 0.76689200  | -2.62665600 | -1.23855200 |
| H  | -1.63968700 | -2.50876300 | -1.12398400 |
| H  | -3.65357300 | -1.60029600 | -1.84725100 |
| H  | -3.94854900 | -2.55737300 | -0.39711200 |
| H  | -5.72400100 | -0.47879500 | -1.61763300 |
| H  | -5.98936200 | 0.61237500  | 0.70582800  |
| C  | -3.68435500 | 1.35801600  | 1.69211600  |
| H  | -3.17331100 | 2.19003900  | 1.20770500  |
| H  | -3.04032400 | 0.97623600  | 2.48013500  |
| H  | -4.60386600 | 1.73238500  | 2.13592800  |
| N  | -5.21631000 | 0.07676500  | 0.33060400  |
| Br | 1.47060900  | 1.79879700  | 1.13083000  |
| Br | -0.06027500 | 1.36910200  | -1.58445800 |
| Br | 2.72453600  | -0.51852900 | -1.28705700 |
| Br | 1.77851200  | -1.56022100 | 1.53472300  |

**1d-Z<sub>out</sub>**

|    |             |             |             |
|----|-------------|-------------|-------------|
| C  | 5.17294500  | 0.83070000  | -1.06845800 |
| C  | 4.18181400  | -0.82193700 | 0.26474100  |
| C  | 3.08428100  | -0.15848000 | -0.38164700 |
| C  | 3.65318400  | 1.03577900  | -1.12626400 |
| C  | 1.75191000  | -0.46000100 | -0.30027000 |
| C  | 1.19645500  | -1.62049900 | 0.34686800  |
| C  | 0.76775100  | 0.44881800  | -0.97954500 |
| C  | -0.13642000 | -1.77996600 | 0.51012300  |
| C  | -0.49182200 | 0.60573300  | -0.13218400 |
| H  | 1.18421400  | 1.43724200  | -1.15504700 |
| H  | 0.47949100  | 0.02175700  | -1.94570000 |
| C  | -1.14511300 | -0.77059700 | 0.08254100  |
| H  | 5.59172600  | 0.48912800  | -2.01326100 |
| H  | -0.53062900 | -2.68878400 | 0.94586600  |
| H  | 1.83442400  | -2.42059400 | 0.68343300  |
| H  | 3.36909800  | 1.96081900  | -0.62322000 |
| H  | 3.29959200  | 1.08820200  | -2.15267500 |
| H  | 5.72301100  | 1.70426600  | -0.73107700 |
| H  | 6.20010200  | -0.55386900 | 0.28355800  |
| C  | 4.19000600  | -1.95228200 | 1.22688200  |
| H  | 3.47053100  | -1.77347800 | 2.02286400  |
| H  | 3.91314600  | -2.87467600 | 0.71692800  |
| H  | 5.17828800  | -2.08367200 | 1.66082600  |
| N  | 5.30584500  | -0.24740300 | -0.07953000 |
| Br | -1.67645600 | 1.86128800  | -0.96891000 |
| Br | 0.08237100  | 1.32988600  | 1.58593200  |
| Br | -2.59135400 | -0.71538300 | 1.34721200  |
| Br | -1.82038600 | -1.46773800 | -1.61544900 |

**2a- $E_{out}$** 

|   |             |             |             |
|---|-------------|-------------|-------------|
| C | -3.23368100 | -1.78557000 | 0.27942200  |
| C | -2.58656100 | 0.42477100  | -0.13903200 |
| C | -1.36200500 | -0.28763300 | 0.01157300  |
| C | -1.70835800 | -1.76529800 | 0.10489100  |
| C | -0.07979500 | 0.21414800  | 0.00443100  |
| C | 1.01400700  | -0.70575200 | 0.01864400  |
| C | 0.25961200  | 1.67857900  | -0.05425600 |
| C | 2.32885400  | -0.32436600 | -0.02396100 |
| C | 1.58853000  | 1.95716000  | 0.63991000  |
| H | 0.33487400  | 1.97742800  | -1.10613200 |
| H | -0.52241500 | 2.27957700  | 0.39863100  |
| C | 2.70298200  | 1.12503300  | 0.02620400  |
| H | 1.82353300  | 3.01795800  | 0.56909200  |
| H | 1.49717600  | 1.71185900  | 1.69965900  |
| H | 3.62444800  | 1.24628800  | 0.59416500  |
| H | 2.91721500  | 1.46803700  | -0.99181300 |
| H | -3.74249700 | -2.47346000 | -0.38944700 |
| H | 0.79994900  | -1.76675100 | 0.00565800  |
| H | -1.21039600 | -2.25115200 | 0.93990800  |
| H | -1.41661200 | -2.28245300 | -0.80966700 |
| H | -3.53592500 | -1.99747000 | 1.30370400  |
| C | -2.84650500 | 1.86532800  | -0.40362900 |
| H | -2.65423400 | 2.45040100  | 0.49496300  |
| H | -2.19831600 | 2.23619200  | -1.19232500 |
| H | -3.88303700 | 2.01860000  | -0.69509000 |
| N | -3.60376700 | -0.40454400 | -0.04805800 |
| C | 3.34622700  | -1.34714100 | -0.13844200 |
| H | 3.00088600  | -2.37457200 | -0.14794100 |
| C | 4.66385100  | -1.10239000 | -0.25606700 |
| H | 5.06401500  | -0.09896200 | -0.26456200 |
| H | 5.36686300  | -1.91611900 | -0.35548100 |
| H | -4.56210200 | -0.09479700 | -0.13504500 |

**2a-Z<sub>in</sub>**

|   |             |             |             |
|---|-------------|-------------|-------------|
| C | 3.84153300  | -0.54100400 | -0.35140000 |
| C | 2.52855000  | -1.31035700 | -0.15040300 |
| C | 1.47248100  | -0.22316500 | -0.03141800 |
| C | 2.16035100  | 1.01702300  | 0.12013200  |
| H | 4.65050100  | -0.87663500 | 0.29063200  |
| H | 4.18064600  | -0.55260500 | -1.38603100 |
| H | 2.33381600  | -1.98527700 | -0.97960000 |
| H | 2.56718500  | -1.90484700 | 0.76298600  |
| C | 0.11623100  | -0.46184700 | -0.02812800 |
| C | -0.89033300 | 0.55405800  | -0.02297800 |
| C | -0.35801500 | -1.88644900 | -0.10501700 |
| C | -2.23173500 | 0.28159200  | -0.05083200 |
| C | -1.69455000 | -2.06379200 | 0.60337900  |
| H | -0.46661200 | -2.15234900 | -1.16346500 |
| H | 0.39010400  | -2.55860800 | 0.31227300  |
| C | -2.73727400 | -1.12673300 | 0.01562500  |
| H | -2.02287100 | -3.09848000 | 0.52067400  |
| H | -1.56892900 | -1.84471900 | 1.66539600  |
| H | -3.65301600 | -1.15879900 | 0.60469000  |
| H | -3.00796500 | -1.44665600 | -0.99650300 |
| C | 1.64362300  | 2.38012000  | 0.40958500  |
| H | 1.12181000  | 2.77217800  | -0.46302200 |
| H | 0.94326900  | 2.35259500  | 1.24095600  |
| H | 2.45883700  | 3.05715200  | 0.65382700  |
| H | -0.60480300 | 1.59316600  | -0.06770000 |
| N | 3.45626000  | 0.82945400  | 0.00421200  |
| C | -3.15877600 | 1.38801900  | -0.17430800 |
| H | -2.72573700 | 2.38163000  | -0.20307600 |
| C | -4.49341900 | 1.25971300  | -0.27780500 |
| H | -4.98114500 | 0.29589700  | -0.26676200 |
| H | -5.12221500 | 2.13110300  | -0.38507600 |
| H | 4.12129000  | 1.58600600  | 0.09173000  |

**2a- $E_{in}$** 

|   |             |             |             |
|---|-------------|-------------|-------------|
| C | 3.23368100  | -1.78557000 | 0.27942200  |
| C | 2.58656100  | 0.42477100  | -0.13903200 |
| C | 1.36200500  | -0.28763300 | 0.01157300  |
| C | 1.70835800  | -1.76529800 | 0.10489100  |
| C | 0.07979500  | 0.21414800  | 0.00443100  |
| C | -1.01400700 | -0.70575200 | 0.01864400  |
| C | -0.25961200 | 1.67857900  | -0.05425600 |
| C | -2.32885400 | -0.32436600 | -0.02396100 |
| C | -1.58853000 | 1.95716000  | 0.63991000  |
| H | 0.52241500  | 2.27957700  | 0.39863100  |
| H | -0.33487400 | 1.97742800  | -1.10613200 |
| C | -2.70298200 | 1.12503300  | 0.02620400  |
| H | -2.91721500 | 1.46803700  | -0.99181200 |
| H | -3.62444800 | 1.24628800  | 0.59416500  |
| H | 3.53592500  | -1.99747000 | 1.30370400  |
| H | -0.79994900 | -1.76675100 | 0.00565800  |
| H | 1.41661200  | -2.28245300 | -0.80966700 |
| H | 1.21039500  | -2.25115200 | 0.93990800  |
| H | 3.74249700  | -2.47346000 | -0.38944700 |
| C | 2.84650500  | 1.86532800  | -0.40363000 |
| H | 2.19831700  | 2.23619200  | -1.19232500 |
| H | 2.65423400  | 2.45040100  | 0.49496300  |
| H | 3.88303700  | 2.01860000  | -0.69509000 |
| H | -1.82353300 | 3.01795800  | 0.56909200  |
| H | -1.49717600 | 1.71185900  | 1.69965900  |
| N | 3.60376700  | -0.40454400 | -0.04805700 |
| C | -3.34622700 | -1.34714100 | -0.13844200 |
| H | -3.00088600 | -2.37457200 | -0.14794100 |
| C | -4.66385100 | -1.10239000 | -0.25606700 |
| H | -5.06401500 | -0.09896200 | -0.26456200 |
| H | -5.36686300 | -1.91611900 | -0.35548100 |
| H | 4.56210200  | -0.09479700 | -0.13504500 |



**2a-Z<sub>out</sub>**

|   |             |             |             |
|---|-------------|-------------|-------------|
| C | -3.84153300 | -0.54100400 | -0.35140000 |
| C | -2.16035100 | 1.01702300  | 0.12013200  |
| C | -1.47248100 | -0.22316500 | -0.03141800 |
| C | -2.52855000 | -1.31035700 | -0.15040300 |
| C | -0.11623100 | -0.46184700 | -0.02812800 |
| C | 0.89033300  | 0.55405800  | -0.02297800 |
| C | 0.35801500  | -1.88644900 | -0.10501700 |
| C | 2.23173500  | 0.28159200  | -0.05083200 |
| C | 1.69455000  | -2.06379200 | 0.60337900  |
| H | -0.39010400 | -2.55860800 | 0.31227300  |
| H | 0.46661200  | -2.15234900 | -1.16346500 |
| C | 2.73727400  | -1.12673300 | 0.01562500  |
| H | 3.00796500  | -1.44665600 | -0.99650300 |
| H | 3.65301600  | -1.15879900 | 0.60469000  |
| H | -4.18064600 | -0.55260500 | -1.38603100 |
| H | 0.60480300  | 1.59316600  | -0.06770000 |
| H | -2.56718500 | -1.90484700 | 0.76298600  |
| H | -2.33381600 | -1.98527700 | -0.97960000 |
| H | -4.65050100 | -0.87663500 | 0.29063200  |
| C | -1.64362300 | 2.38012000  | 0.40958500  |
| H | -0.94326900 | 2.35259500  | 1.24095600  |
| H | -1.12181000 | 2.77217800  | -0.46302200 |
| H | -2.45883700 | 3.05715200  | 0.65382700  |
| H | 2.02287100  | -3.09848000 | 0.52067400  |
| H | 1.56892900  | -1.84471900 | 1.66539600  |
| N | -3.45626000 | 0.82945400  | 0.00421200  |
| C | 3.15877600  | 1.38801900  | -0.17430800 |
| H | 2.72573700  | 2.38163000  | -0.20307600 |
| C | 4.49341900  | 1.25971300  | -0.27780500 |
| H | 4.98114500  | 0.29589700  | -0.26676200 |
| H | 5.12221500  | 2.13110300  | -0.38507600 |
| H | -4.12129000 | 1.58600600  | 0.09173000  |

**2b- $E_{out}$** 

|   |             |             |             |
|---|-------------|-------------|-------------|
| C | 4.15988800  | 1.50637100  | 0.47951100  |
| C | 3.16495400  | -0.46865300 | -0.28699600 |
| C | 2.07577700  | 0.41981500  | -0.05660700 |
| C | 2.66591200  | 1.78454900  | 0.26045300  |
| C | 0.72863700  | 0.15605600  | -0.15672300 |
| C | -0.19494500 | 1.23300100  | -0.03378200 |
| C | 0.12789900  | -1.18563800 | -0.42229300 |
| C | -1.56001800 | 1.08999700  | -0.06484800 |
| C | -1.19637200 | -1.37280200 | 0.33269200  |
| H | -0.04418100 | -1.28699300 | -1.49908200 |
| H | 0.79359000  | -1.99201700 | -0.12600700 |
| C | -2.22317900 | -0.27371100 | -0.09229700 |
| H | 4.81621500  | 2.18397000  | -0.05855700 |
| H | 0.19694200  | 2.24020100  | 0.03544100  |
| H | 2.21396800  | 2.23216000  | 1.14169400  |
| H | 2.51864200  | 2.46606300  | -0.57817300 |
| H | 4.43575100  | 1.50602600  | 1.53286500  |
| C | 3.18476600  | -1.87802400 | -0.76263500 |
| H | 2.85803800  | -2.54500400 | 0.03439300  |
| H | 2.51484500  | -2.00929900 | -1.60757200 |
| H | 4.19095500  | -2.16644200 | -1.05852200 |
| N | 4.30414300  | 0.14536500  | -0.04860500 |
| C | -2.29795400 | 2.34694000  | -0.08469700 |
| H | -1.68736200 | 3.21869600  | 0.12755600  |
| C | -3.58756300 | 2.58221400  | -0.39086600 |
| H | -4.29043500 | 1.81211900  | -0.66043500 |
| H | -3.95160900 | 3.59960400  | -0.39564400 |
| C | -3.41984800 | -0.30343500 | 0.87604700  |
| H | -3.18341300 | 0.16678300  | 1.82845200  |
| H | -4.28540100 | 0.20217000  | 0.46192200  |
| H | -3.71559600 | -1.33322700 | 1.06719900  |
| C | -2.73335300 | -0.52498000 | -1.52455300 |
| H | -3.36277200 | -1.41323500 | -1.54940200 |
| H | -3.32734200 | 0.31616600  | -1.87314300 |
| H | -1.91637500 | -0.65899300 | -2.23317600 |
| C | -1.68976300 | -2.78231600 | 0.00157000  |
| H | -1.75237500 | -2.95169900 | -1.07219100 |
| H | -0.99151100 | -3.51250000 | 0.41335300  |
| H | -2.66519200 | -2.98912600 | 0.43817400  |
| C | -0.90637500 | -1.30808200 | 1.83709000  |
| H | -1.76282800 | -1.64578400 | 2.41687100  |
| H | -0.07175800 | -1.96941300 | 2.07772900  |
| H | -0.64881900 | -0.30253600 | 2.16946000  |
| H | 5.19824700  | -0.31306100 | -0.15936200 |

**2b-Z<sub>in</sub>**

|   |             |             |             |
|---|-------------|-------------|-------------|
| C | 4.40472200  | -0.83466800 | -0.48408900 |
| C | 2.96656800  | -1.36938200 | -0.43133000 |
| C | 2.12012600  | -0.13232100 | -0.17927100 |
| C | 3.01018300  | 0.91988800  | 0.18614900  |
| H | 5.10955700  | -1.40842900 | 0.11020400  |
| H | 4.78326000  | -0.74995800 | -1.50162300 |
| H | 2.69589500  | -1.87355100 | -1.35508200 |
| H | 2.85089400  | -2.08155700 | 0.38642500  |
| C | 0.74575800  | -0.10483300 | -0.24233200 |
| C | -0.05545600 | 1.06842600  | -0.12352600 |
| C | -0.00352600 | -1.36696000 | -0.51435900 |
| C | -1.42790900 | 1.05767800  | -0.11024000 |
| C | -1.30876300 | -1.43212100 | 0.28916400  |
| H | -0.22139000 | -1.41734200 | -1.58668400 |
| H | 0.60096800  | -2.24262800 | -0.27498100 |
| C | -2.23079900 | -0.22973900 | -0.09428400 |
| C | 2.72626400  | 2.29278100  | 0.67868100  |
| H | 2.37022000  | 2.91512400  | -0.14225100 |
| H | 1.95533300  | 2.26944200  | 1.44506500  |
| H | 3.62473700  | 2.74853600  | 1.08843600  |
| H | 0.42007900  | 2.03709100  | -0.11070600 |
| N | 4.25571500  | 0.51288200  | 0.07850600  |
| C | -2.03751500 | 2.38344500  | -0.13361100 |
| H | -1.33291800 | 3.19323300  | 0.02860500  |
| C | -3.30911800 | 2.74604200  | -0.38379400 |
| H | -4.10147000 | 2.04914000  | -0.59827100 |
| H | -3.56513700 | 3.79575800  | -0.39684100 |
| C | -3.37692500 | -0.13032800 | 0.92875800  |
| H | -3.04595500 | 0.30801800  | 1.86818300  |
| H | -4.20049600 | 0.46821400  | 0.55502400  |
| H | -3.77374100 | -1.12256900 | 1.13556500  |
| C | -2.83173700 | -0.43020300 | -1.49923700 |
| H | -3.55501000 | -1.24405900 | -1.48553700 |
| H | -3.34511400 | 0.46884500  | -1.83025700 |
| H | -2.06843300 | -0.65867700 | -2.24261100 |
| C | -0.95564500 | -1.40657200 | 1.78155300  |
| H | -1.81745300 | -1.66347200 | 2.39394200  |
| H | -0.18020200 | -2.14707700 | 1.98655300  |
| H | -0.59002800 | -0.43227300 | 2.10646600  |
| C | -1.95583700 | -2.78154200 | -0.02563600 |
| H | -2.07305200 | -2.93848100 | -1.09653900 |
| H | -1.32209000 | -3.58127000 | 0.35988400  |
| H | -2.93159400 | -2.88758800 | 0.44548100  |
| H | 5.04079400  | 1.10780500  | 0.30642600  |

**2b- $E_{in}$** 

|   |             |             |             |
|---|-------------|-------------|-------------|
| C | -4.15988500 | 1.50637100  | 0.47951700  |
| C | -3.16495400 | -0.46865200 | -0.28699700 |
| C | -2.07577600 | 0.41981600  | -0.05660800 |
| C | -2.66591000 | 1.78455000  | 0.26045100  |
| C | -0.72863700 | 0.15605700  | -0.15672600 |
| C | 0.19494600  | 1.23300100  | -0.03378800 |
| C | -0.12789900 | -1.18563800 | -0.42229500 |
| C | 1.56001800  | 1.08999700  | -0.06485100 |
| C | 1.19637100  | -1.37280300 | 0.33269100  |
| H | -0.79359200 | -1.99201700 | -0.12600900 |
| H | 0.04418200  | -1.28699400 | -1.49908400 |
| C | 2.22317900  | -0.27371200 | -0.09229700 |
| H | -4.43574200 | 1.50602200  | 1.53287200  |
| H | -0.19694200 | 2.24020200  | 0.03543300  |
| H | -2.51864500 | 2.46606100  | -0.57817900 |
| H | -2.21396300 | 2.23216400  | 1.14168800  |
| H | -4.81621600 | 2.18397100  | -0.05854500 |
| C | -3.18476900 | -1.87802200 | -0.76263700 |
| H | -2.51484700 | -2.00930000 | -1.60757300 |
| H | -2.85804400 | -2.54500300 | 0.03439200  |
| H | -4.19095800 | -2.16643800 | -1.05852500 |
| N | -4.30414300 | 0.14536700  | -0.04860300 |
| C | 2.29795500  | 2.34693900  | -0.08470000 |
| H | 1.68736200  | 3.21869600  | 0.12754700  |
| C | 3.58756600  | 2.58221100  | -0.39086200 |
| H | 4.29043900  | 1.81211500  | -0.66042600 |
| H | 3.95161300  | 3.59960000  | -0.39564300 |
| H | -5.19824700 | -0.31305900 | -0.15936000 |
| C | 3.41984500  | -0.30343500 | 0.87605200  |
| H | 4.28540000  | 0.20216800  | 0.46192700  |
| H | 3.18340800  | 0.16678500  | 1.82845500  |
| H | 3.71559100  | -1.33322600 | 1.06720600  |
| C | 2.73335800  | -0.52498000 | -1.52455000 |
| H | 3.32734700  | 0.31616600  | -1.87313700 |
| H | 3.36277900  | -1.41323400 | -1.54939700 |
| H | 1.91638300  | -0.65899400 | -2.23317600 |
| C | 1.68976100  | -2.78231600 | 0.00157100  |
| H | 0.99150900  | -3.51250000 | 0.41335500  |
| H | 1.75237300  | -2.95170100 | -1.07219000 |
| H | 2.66519000  | -2.98912600 | 0.43817600  |
| C | 0.90637200  | -1.30808100 | 1.83708800  |
| H | 0.07175600  | -1.96941400 | 2.07772800  |
| H | 1.76282500  | -1.64578000 | 2.41687100  |
| H | 0.64881400  | -0.30253600 | 2.16945700  |

**2b-Z<sub>out</sub>**

|   |             |             |             |
|---|-------------|-------------|-------------|
| C | -4.40472200 | -0.83466800 | -0.48408900 |
| C | -3.01018300 | 0.91988800  | 0.18614900  |
| C | -2.12012600 | -0.13232100 | -0.17927000 |
| C | -2.96656800 | -1.36938200 | -0.43133000 |
| C | -0.74575800 | -0.10483300 | -0.24233200 |
| C | 0.05545600  | 1.06842600  | -0.12352600 |
| C | 0.00352600  | -1.36696000 | -0.51435900 |
| C | 1.42790900  | 1.05767800  | -0.11024000 |
| C | 1.30876300  | -1.43212100 | 0.28916400  |
| H | -0.60096800 | -2.24262800 | -0.27498100 |
| H | 0.22139000  | -1.41734200 | -1.58668400 |
| C | 2.23079900  | -0.22973900 | -0.09428400 |
| H | -4.78326000 | -0.74995800 | -1.50162300 |
| H | -0.42007900 | 2.03709100  | -0.11070600 |
| H | -2.85089400 | -2.08155700 | 0.38642500  |
| H | -2.69589500 | -1.87355100 | -1.35508200 |
| H | -5.10955700 | -1.40842900 | 0.11020400  |
| C | -2.72626400 | 2.29278100  | 0.67868100  |
| H | -1.95533300 | 2.26944200  | 1.44506500  |
| H | -2.37022000 | 2.91512400  | -0.14225100 |
| H | -3.62473700 | 2.74853600  | 1.08843600  |
| N | -4.25571500 | 0.51288200  | 0.07850600  |
| C | 2.03751500  | 2.38344500  | -0.13361100 |
| H | 1.33291800  | 3.19323300  | 0.02860500  |
| C | 3.30911800  | 2.74604200  | -0.38379400 |
| H | 4.10147000  | 2.04914000  | -0.59827100 |
| H | 3.56513700  | 3.79575800  | -0.39684100 |
| C | 3.37692500  | -0.13032800 | 0.92875800  |
| H | 4.20049600  | 0.46821400  | 0.55502400  |
| H | 3.04595500  | 0.30801800  | 1.86818300  |
| H | 3.77374100  | -1.12256900 | 1.13556500  |
| C | 2.83173700  | -0.43020300 | -1.49923700 |
| H | 3.34511400  | 0.46884500  | -1.83025700 |
| H | 3.55501000  | -1.24405900 | -1.48553700 |
| H | 2.06843300  | -0.65867700 | -2.24261100 |
| C | 0.95564500  | -1.40657200 | 1.78155300  |
| H | 0.18020200  | -2.14707700 | 1.98655300  |
| H | 1.81745300  | -1.66347200 | 2.39394200  |
| H | 0.59002800  | -0.43227300 | 2.10646600  |
| C | 1.95583700  | -2.78154200 | -0.02563600 |
| H | 1.32209000  | -3.58127000 | 0.35988400  |
| H | 2.07305200  | -2.93848100 | -1.09653900 |
| H | 2.93159400  | -2.88758800 | 0.44548100  |
| H | -5.04079400 | 1.10780500  | 0.30642600  |

**2c- $E_{\text{out}}$** 

|    |             |             |             |
|----|-------------|-------------|-------------|
| C  | 4.72660700  | 1.35422600  | 0.43999000  |
| C  | 3.55685600  | -0.50681700 | -0.37231200 |
| C  | 2.54797600  | 0.46834100  | -0.09529500 |
| C  | 3.25322700  | 1.75828100  | 0.28570700  |
| C  | 1.18453200  | 0.32376800  | -0.18097300 |
| C  | 0.35291800  | 1.46285100  | 0.03081000  |
| C  | 0.49029000  | -0.95805800 | -0.52752200 |
| C  | -1.01737900 | 1.45493400  | 0.00920200  |
| C  | -0.83311200 | -1.05249800 | 0.21808700  |
| H  | 0.27845300  | -0.99719300 | -1.59947000 |
| H  | 1.06627700  | -1.83430300 | -0.25503600 |
| C  | -1.75477400 | 0.14324800  | -0.14500100 |
| H  | 5.41560400  | 1.98643900  | -0.11259500 |
| H  | 0.82487400  | 2.42817600  | 0.16102100  |
| H  | 2.86058100  | 2.17723300  | 1.20876400  |
| H  | 3.13704400  | 2.50369500  | -0.50141600 |
| H  | 5.04448100  | 1.30614800  | 1.47988900  |
| C  | 3.44764100  | -1.89631200 | -0.88961100 |
| H  | 3.04613800  | -2.54995700 | -0.11536700 |
| H  | 2.78251100  | -1.93836800 | -1.74791100 |
| H  | 4.42497600  | -2.27384400 | -1.18113000 |
| N  | 4.74145200  | -0.00176800 | -0.12080900 |
| C  | -1.70000100 | 2.73151200  | 0.06010700  |
| H  | -1.06705700 | 3.56402700  | 0.34540300  |
| C  | -2.97356000 | 2.99251600  | -0.28621200 |
| H  | -3.65849500 | 2.22976000  | -0.61893300 |
| H  | -3.33346700 | 4.01073700  | -0.25445300 |
| Cl | -3.21467100 | 0.06411900  | 0.85022200  |
| Cl | -0.47335900 | -1.00678700 | 1.96720900  |
| Cl | -1.60131500 | -2.59297300 | -0.17315000 |
| Cl | -2.19842200 | 0.02245200  | -1.87886300 |
| H  | 5.59263400  | -0.53192500 | -0.25707000 |

**2c-Z<sub>in</sub>**

|    |             |             |             |
|----|-------------|-------------|-------------|
| C  | 4.77427000  | -0.97985200 | -0.60203500 |
| C  | 3.29290800  | -1.38070900 | -0.58149700 |
| C  | 2.56229200  | -0.09080300 | -0.25379200 |
| C  | 3.54637700  | 0.86285900  | 0.16005500  |
| H  | 5.41677700  | -1.63868900 | -0.02545300 |
| H  | 5.17267100  | -0.88677800 | -1.61090700 |
| H  | 2.98229100  | -1.80155600 | -1.53429100 |
| H  | 3.10650600  | -2.12568400 | 0.19317500  |
| C  | 1.19729300  | 0.05685000  | -0.28748100 |
| C  | 0.49619300  | 1.28180200  | -0.07532900 |
| C  | 0.35971300  | -1.13729900 | -0.63176000 |
| C  | -0.86798200 | 1.40285300  | -0.04478000 |
| C  | -0.92961400 | -1.11355900 | 0.17316200  |
| H  | 0.10390200  | -1.12533400 | -1.69509100 |
| H  | 0.87225200  | -2.07130600 | -0.41456800 |
| C  | -1.74095300 | 0.17148200  | -0.14588300 |
| C  | 3.38474900  | 2.22487900  | 0.72915800  |
| H  | 3.05355600  | 2.91456000  | -0.04721000 |
| H  | 2.63801700  | 2.21672300  | 1.52008000  |
| H  | 4.32695200  | 2.58988000  | 1.13109300  |
| H  | 1.04820500  | 2.20573100  | -0.00389200 |
| N  | 4.74518100  | 0.35147900  | 0.01696800  |
| C  | -1.42155100 | 2.74252300  | 0.00536600  |
| H  | -0.69714100 | 3.51466200  | 0.23914900  |
| C  | -2.67927400 | 3.12309100  | -0.28023200 |
| H  | -3.45385700 | 2.42692900  | -0.55737200 |
| H  | -2.93420100 | 4.17265400  | -0.25360400 |
| Cl | -2.28940300 | 0.09382700  | -1.85217500 |
| Cl | -3.14458000 | 0.24718500  | 0.92794400  |
| Cl | -1.86534100 | -2.56672700 | -0.17614400 |
| Cl | -0.48191700 | -1.10934500 | 1.90489700  |
| H  | 5.58238400  | 0.85915900  | 0.27352200  |

**2c- $E_{in}$** 

|    |             |             |             |
|----|-------------|-------------|-------------|
| C  | -4.72660600 | 1.35422600  | 0.43999100  |
| C  | -3.55685700 | -0.50681700 | -0.37231300 |
| C  | -2.54797600 | 0.46834100  | -0.09529600 |
| C  | -3.25322700 | 1.75828200  | 0.28570500  |
| C  | -1.18453200 | 0.32376800  | -0.18097600 |
| C  | -0.35291700 | 1.46285200  | 0.03080600  |
| C  | -0.49029000 | -0.95805700 | -0.52752400 |
| C  | 1.01737900  | 1.45493400  | 0.00920100  |
| C  | 0.83311200  | -1.05249800 | 0.21808700  |
| H  | -1.06627700 | -1.83430300 | -0.25503900 |
| H  | -0.27845000 | -0.99719300 | -1.59947200 |
| C  | 1.75477500  | 0.14324800  | -0.14500100 |
| H  | -5.04447900 | 1.30614800  | 1.47989100  |
| H  | -0.82487300 | 2.42817700  | 0.16101600  |
| H  | -3.13704500 | 2.50369500  | -0.50141800 |
| H  | -2.86058000 | 2.17723400  | 1.20876200  |
| H  | -5.41560400 | 1.98644000  | -0.11259200 |
| C  | -3.44764200 | -1.89631200 | -0.88961100 |
| H  | -2.78251300 | -1.93836800 | -1.74791100 |
| H  | -3.04613900 | -2.54995600 | -0.11536700 |
| H  | -4.42497700 | -2.27384400 | -1.18113000 |
| N  | -4.74145200 | -0.00176800 | -0.12080800 |
| C  | 1.70000200  | 2.73151200  | 0.06011000  |
| H  | 1.06706200  | 3.56402700  | 0.34541400  |
| C  | 2.97356000  | 2.99251300  | -0.28621500 |
| H  | 3.65849100  | 2.22975600  | -0.61894300 |
| H  | 3.33347100  | 4.01073300  | -0.25445400 |
| H  | -5.59263500 | -0.53192500 | -0.25706800 |
| Cl | 3.21467000  | 0.06412000  | 0.85022400  |
| Cl | 2.19842500  | 0.02245100  | -1.87886200 |
| Cl | 1.60131400  | -2.59297300 | -0.17314800 |
| Cl | 0.47335700  | -1.00678600 | 1.96720900  |



**2c-Z<sub>out</sub>**

|    |             |             |             |
|----|-------------|-------------|-------------|
| C  | -4.77427000 | -0.97985200 | -0.60203500 |
| C  | -3.54637700 | 0.86285900  | 0.16005500  |
| C  | -2.56229200 | -0.09080300 | -0.25379200 |
| C  | -3.29290800 | -1.38070900 | -0.58149700 |
| C  | -1.19729300 | 0.05685000  | -0.28748100 |
| C  | -0.49619300 | 1.28180200  | -0.07532900 |
| C  | -0.35971300 | -1.13729900 | -0.63176000 |
| C  | 0.86798200  | 1.40285400  | -0.04478000 |
| C  | 0.92961400  | -1.11355900 | 0.17316200  |
| H  | -0.87225200 | -2.07130600 | -0.41456800 |
| H  | -0.10390200 | -1.12533400 | -1.69509100 |
| C  | 1.74095300  | 0.17148200  | -0.14588300 |
| H  | -5.17267100 | -0.88677800 | -1.61090700 |
| H  | -1.04820500 | 2.20573100  | -0.00389200 |
| H  | -3.10650600 | -2.12568400 | 0.19317500  |
| H  | -2.98229100 | -1.80155600 | -1.53429100 |
| H  | -5.41677700 | -1.63868900 | -0.02545300 |
| C  | -3.38475000 | 2.22487900  | 0.72915800  |
| H  | -2.63801700 | 2.21672300  | 1.52008000  |
| H  | -3.05355600 | 2.91456000  | -0.04721000 |
| H  | -4.32695200 | 2.58988000  | 1.13109300  |
| N  | -4.74518100 | 0.35147900  | 0.01696800  |
| C  | 1.42155100  | 2.74252300  | 0.00536600  |
| H  | 0.69714100  | 3.51466200  | 0.23914900  |
| C  | 2.67927400  | 3.12309100  | -0.28023200 |
| H  | 3.45385700  | 2.42692900  | -0.55737200 |
| H  | 2.93420100  | 4.17265400  | -0.25360400 |
| Cl | 0.48191700  | -1.10934500 | 1.90489700  |
| Cl | 1.86534100  | -2.56672700 | -0.17614400 |
| Cl | 3.14458000  | 0.24718500  | 0.92794400  |
| Cl | 2.28940300  | 0.09382700  | -1.85217500 |
| H  | -5.58238400 | 0.85915900  | 0.27352200  |

**2d- $E_{out}$** 

|    |             |             |             |
|----|-------------|-------------|-------------|
| C  | -5.40637800 | 1.28958500  | -0.43128100 |
| C  | -4.11171900 | -0.37210500 | 0.59564300  |
| C  | -3.16771100 | 0.60287000  | 0.14805500  |
| C  | -3.95289900 | 1.78426000  | -0.39391700 |
| C  | -1.79609700 | 0.54201600  | 0.20638500  |
| C  | -1.03509100 | 1.67610000  | -0.19819400 |
| C  | -1.02254300 | -0.63524700 | 0.71538900  |
| C  | 0.33553000  | 1.74531300  | -0.21365400 |
| C  | 0.28867800  | -0.76621700 | -0.04780800 |
| H  | -0.78623200 | -0.49979100 | 1.77546400  |
| H  | -1.55746600 | -1.56955700 | 0.59683700  |
| C  | 1.14568100  | 0.51252400  | 0.10047700  |
| H  | -6.11065000 | 1.96008300  | 0.05276500  |
| H  | -1.56273400 | 2.58533200  | -0.45631600 |
| H  | -3.61059600 | 2.07718300  | -1.38335400 |
| H  | -3.85355300 | 2.64505900  | 0.26777800  |
| H  | -5.75407600 | 1.07770400  | -1.44069200 |
| C  | -3.90994300 | -1.66578800 | 1.29984700  |
| H  | -3.48839300 | -2.39976600 | 0.61306500  |
| H  | -3.22383700 | -1.54890700 | 2.13448400  |
| H  | -4.85665000 | -2.05081800 | 1.67169800  |
| N  | -5.32990100 | 0.02916600  | 0.31607100  |
| C  | 0.92680200  | 3.04427100  | -0.47109400 |
| H  | 0.23403600  | 3.77368700  | -0.87515700 |
| C  | 2.17636600  | 3.45081000  | -0.18428700 |
| H  | 2.91584100  | 2.80410800  | 0.25890000  |
| H  | 2.45896600  | 4.47495200  | -0.38141000 |
| Br | 2.72886900  | 0.35480900  | -0.99035700 |
| Br | 1.66720000  | 0.71606300  | 1.97716100  |
| Br | 1.20491400  | -2.33510200 | 0.58319600  |
| Br | -0.17737500 | -1.02903400 | -1.92300900 |
| H  | -6.14570200 | -0.51954100 | 0.55536100  |

**2d-Z<sub>in</sub>**

|    |             |             |             |
|----|-------------|-------------|-------------|
| C  | -5.31691800 | -0.87862000 | 0.94249300  |
| C  | -3.81615300 | -1.20017800 | 0.93548600  |
| C  | -3.16724300 | 0.06452600  | 0.40325000  |
| C  | -4.21093900 | 0.89318900  | -0.11579600 |
| H  | -5.93425500 | -1.64841900 | 0.48901100  |
| H  | -5.69646000 | -0.65836100 | 1.93885600  |
| H  | -3.46118700 | -1.46158200 | 1.92905100  |
| H  | -3.60451700 | -2.03843700 | 0.26998800  |
| C  | -1.81137400 | 0.28303000  | 0.36784400  |
| C  | -1.18321400 | 1.49503400  | -0.04263800 |
| C  | -0.90162100 | -0.80434200 | 0.85178900  |
| C  | 0.17309900  | 1.67993300  | -0.13296900 |
| C  | 0.36387600  | -0.83003600 | 0.00828800  |
| H  | -0.61977100 | -0.62120400 | 1.89377700  |
| H  | -1.37207600 | -1.78270400 | 0.79376000  |
| C  | 1.10928300  | 0.52166400  | 0.10616100  |
| C  | -4.13655400 | 2.16247900  | -0.88286400 |
| H  | -3.82516200 | 2.97528700  | -0.22674800 |
| H  | -3.40858000 | 2.07425200  | -1.68644900 |
| H  | -5.10601800 | 2.41634900  | -1.30507100 |
| H  | -1.78552000 | 2.37036700  | -0.22869100 |
| N  | -5.37660900 | 0.34607300  | 0.13448000  |
| C  | 0.63423700  | 3.03239900  | -0.39157500 |
| H  | -0.14461000 | 3.70818000  | -0.72695100 |
| C  | 1.86140600  | 3.54103100  | -0.18519600 |
| H  | 2.68544800  | 2.95294600  | 0.18402600  |
| H  | 2.03899100  | 4.58984800  | -0.37494300 |
| Br | 1.74583700  | 0.76230300  | 1.94279800  |
| Br | 2.61665400  | 0.51479600  | -1.09807300 |
| Br | 1.45512300  | -2.31012600 | 0.56489200  |
| Br | -0.20250700 | -1.13340700 | -1.83554300 |
| H  | -6.24611600 | 0.76548500  | -0.16922300 |

**2d- $E_{in}$** 

|    |             |             |             |
|----|-------------|-------------|-------------|
| C  | 5.40653500  | 1.28927500  | -0.43165500 |
| C  | 4.11177000  | -0.37198800 | 0.59580300  |
| C  | 3.16780100  | 0.60272000  | 0.14758900  |
| C  | 3.95301500  | 1.78391000  | -0.39477200 |
| C  | 1.79619400  | 0.54188700  | 0.20583400  |
| C  | 1.03521800  | 1.67584000  | -0.19916700 |
| C  | 1.02261800  | -0.63530400 | 0.71502500  |
| C  | -0.33536600 | 1.74520000  | -0.21438200 |
| C  | -0.28869300 | -0.76628500 | -0.04799400 |
| H  | 1.55753300  | -1.56963000 | 0.59653900  |
| H  | 0.78637500  | -0.49979700 | 1.77511300  |
| C  | -1.14555100 | 0.51264300  | 0.10050800  |
| H  | 5.75445700  | 1.07695900  | -1.44090000 |
| H  | 1.56293800  | 2.58489000  | -0.45779400 |
| H  | 3.85351600  | 2.64504300  | 0.26647000  |
| H  | 3.61085900  | 2.07639800  | -1.38439500 |
| H  | 6.11068900  | 1.96004100  | 0.05220100  |
| C  | 3.90994300  | -1.66531600 | 1.30065200  |
| H  | 3.22346000  | -1.54812300 | 2.13493400  |
| H  | 3.48884200  | -2.39979200 | 0.61412300  |
| H  | 4.85656700  | -2.04994900 | 1.67313400  |
| N  | 5.32998700  | 0.02921000  | 0.31628500  |
| C  | -0.92668300 | 3.04415400  | -0.47180500 |
| H  | -0.23415900 | 3.77338800  | -0.87661200 |
| C  | -2.17599400 | 3.45073600  | -0.18407100 |
| H  | -2.91509200 | 2.80406300  | 0.25981000  |
| H  | -2.45886800 | 4.47479700  | -0.38121300 |
| H  | 6.14579500  | -0.51927600 | 0.55603400  |
| Br | -2.72916900 | 0.35493300  | -0.98982800 |
| Br | -1.66656300 | 0.71658900  | 1.97711800  |
| Br | -1.20498400 | -2.33498700 | 0.58359700  |
| Br | 0.17678200  | -1.02963100 | -1.92319600 |

**2d-Z<sub>out</sub>**

|    |             |             |             |
|----|-------------|-------------|-------------|
| C  | 5.31691800  | -0.87862000 | 0.94249300  |
| C  | 4.21093900  | 0.89318900  | -0.11579600 |
| C  | 3.16724300  | 0.06452600  | 0.40325000  |
| C  | 3.81615300  | -1.20017800 | 0.93548600  |
| C  | 1.81137400  | 0.28303000  | 0.36784400  |
| C  | 1.18321400  | 1.49503400  | -0.04263800 |
| C  | 0.90162100  | -0.80434200 | 0.85178900  |
| C  | -0.17309900 | 1.67993300  | -0.13296900 |
| C  | -0.36387600 | -0.83003600 | 0.00828800  |
| H  | 1.37207600  | -1.78270400 | 0.79376000  |
| H  | 0.61977100  | -0.62120400 | 1.89377700  |
| C  | -1.10928300 | 0.52166400  | 0.10616100  |
| H  | 5.69646000  | -0.65836100 | 1.93885600  |
| H  | 1.78552000  | 2.37036700  | -0.22869100 |
| H  | 3.60451700  | -2.03843700 | 0.26998800  |
| H  | 3.46118700  | -1.46158200 | 1.92905100  |
| H  | 5.93425500  | -1.64841900 | 0.48901100  |
| C  | 4.13655400  | 2.16247900  | -0.88286400 |
| H  | 3.40858000  | 2.07425200  | -1.68644900 |
| H  | 3.82516200  | 2.97528700  | -0.22674800 |
| H  | 5.10601800  | 2.41634900  | -1.30507100 |
| N  | 5.37660900  | 0.34607300  | 0.13448000  |
| C  | -0.63423700 | 3.03239900  | -0.39157500 |
| H  | 0.14461000  | 3.70818000  | -0.72695100 |
| C  | -1.86140500 | 3.54103100  | -0.18519600 |
| H  | -2.68544800 | 2.95294600  | 0.18402600  |
| H  | -2.03899100 | 4.58984800  | -0.37494300 |
| Br | -2.61665400 | 0.51479600  | -1.09807300 |
| Br | -1.74583700 | 0.76230300  | 1.94279800  |
| Br | -1.45512300 | -2.31012600 | 0.56489200  |
| Br | 0.20250600  | -1.13340700 | -1.83554300 |
| H  | 6.24611600  | 0.76548500  | -0.16922300 |

**3a- $E_{out}$** 

|   |             |             |             |
|---|-------------|-------------|-------------|
| C | -1.53165900 | 0.91111900  | -0.17925800 |
| C | -0.65060000 | -0.21625100 | -0.16916800 |
| C | -1.28467100 | -1.59975700 | -0.20839600 |
| C | 0.72897600  | -0.09883200 | -0.17776700 |
| C | 1.52762400  | -1.27093500 | -0.44421000 |
| C | 1.50548400  | 1.16420000  | 0.07752900  |
| C | 2.88045900  | -1.26672400 | -0.36035300 |
| C | 2.76550200  | 0.86269900  | 0.89132600  |
| H | 1.80289500  | 1.60394500  | -0.88123600 |
| H | 0.90920300  | 1.89639400  | 0.60933700  |
| C | 3.66492500  | -0.11097200 | 0.14901400  |
| H | 3.29015600  | 1.79352400  | 1.09923800  |
| H | 2.47506100  | 0.42890900  | 1.85005700  |
| H | 4.47609900  | -0.47054100 | 0.78267000  |
| H | 4.14809100  | 0.38197800  | -0.70294900 |
| H | 1.04542500  | -2.16761400 | -0.80305700 |
| H | -0.66453300 | -2.29439000 | 0.35470700  |
| H | -1.32217800 | -1.98497700 | -1.23461500 |
| C | -1.17810800 | 2.31705700  | -0.55202300 |
| H | -0.88803100 | 2.88987900  | 0.32842000  |
| H | -0.36618000 | 2.34843300  | -1.26898000 |
| H | -2.04643400 | 2.80480800  | -0.99286900 |
| N | -2.81116600 | 0.71830400  | 0.08762000  |
| C | -3.37864500 | -0.50550300 | 0.49526600  |
| H | -4.38418100 | -0.44519000 | 0.87776600  |
| C | -2.66404400 | -1.62216100 | 0.37155500  |
| H | -3.10060100 | -2.56441800 | 0.66744800  |
| H | -3.42576300 | 1.51928900  | 0.02023000  |
| H | 3.41766500  | -2.15179900 | -0.68059500 |

**3a-Z<sub>in</sub>**

|   |             |             |             |
|---|-------------|-------------|-------------|
| C | 2.74040900  | -1.56919800 | -0.30165300 |
| C | 1.30500500  | -1.58320800 | 0.12291300  |
| C | 0.65615400  | -0.20955000 | 0.04543700  |
| C | 1.50852000  | 0.93274100  | 0.17361600  |
| H | 3.22464600  | -2.49640500 | -0.56954400 |
| H | 0.76023000  | -2.27672500 | -0.51478200 |
| H | 1.23892700  | -1.99132200 | 1.13884700  |
| C | -0.71898300 | -0.11573500 | -0.07962700 |
| C | -1.43178900 | 1.07915300  | -0.46146600 |
| C | -1.55794200 | -1.35381400 | 0.06781300  |
| C | -2.78241300 | 1.11033000  | -0.56307000 |
| C | -2.91891000 | -1.02874100 | 0.68071400  |
| H | -1.69889200 | -1.79760800 | -0.92590600 |
| H | -1.04802700 | -2.09566500 | 0.67780900  |
| C | -3.66796300 | -0.01812100 | -0.17112500 |
| H | -3.49531500 | -1.94520900 | 0.79202900  |
| H | -2.76697100 | -0.61689800 | 1.68029000  |
| H | -4.54680800 | 0.36772400  | 0.34639200  |
| H | -4.04536500 | -0.48837100 | -1.08694400 |
| C | 1.08386100  | 2.32253700  | 0.53047000  |
| H | 0.90917600  | 2.91426900  | -0.36840600 |
| H | 0.17803900  | 2.32146900  | 1.12683600  |
| H | 1.87604200  | 2.81017700  | 1.09709000  |
| H | -0.88590400 | 1.94472000  | -0.79702600 |
| N | 2.81320400  | 0.76640000  | 0.05358600  |
| C | 3.44451200  | -0.43919000 | -0.31578800 |
| H | 4.48546000  | -0.35407700 | -0.58085400 |
| H | 3.40219900  | 1.57384800  | 0.21220000  |
| H | -3.24263900 | 2.00204400  | -0.97253000 |

**3a- $E_{in}$** 

|   |             |             |             |
|---|-------------|-------------|-------------|
| C | 1.53165700  | 0.91112000  | -0.17925700 |
| C | 0.65060200  | -0.21625200 | -0.16915600 |
| C | 1.28468000  | -1.59975500 | -0.20839400 |
| C | -0.72897600 | -0.09884000 | -0.17774600 |
| C | -1.52762000 | -1.27094600 | -0.44418100 |
| C | -1.50548500 | 1.16419400  | 0.07754100  |
| C | -2.88045700 | -1.26673000 | -0.36035100 |
| C | -2.76552200 | 0.86270300  | 0.89130900  |
| H | -0.90921000 | 1.89638100  | 0.60936500  |
| H | -1.80286900 | 1.60394600  | -0.88122900 |
| C | -3.66493200 | -0.11097000 | 0.14898300  |
| H | -1.04541900 | -2.16763200 | -0.80300600 |
| H | 1.32218700  | -1.98496500 | -1.23461700 |
| H | 0.66454800  | -2.29439500 | 0.35470500  |
| C | 1.17810000  | 2.31706000  | -0.55200900 |
| H | 0.36618000  | 2.34843800  | -1.26897600 |
| H | 0.88800300  | 2.88986700  | 0.32843800  |
| H | 2.04642700  | 2.80482600  | -0.99283600 |
| N | 2.81117000  | 0.71830700  | 0.08759900  |
| C | 3.37865600  | -0.50549500 | 0.49525000  |
| H | 4.38419400  | -0.44517700 | 0.87774400  |
| C | 2.66405500  | -1.62215600 | 0.37155400  |
| H | 3.10061200  | -2.56440900 | 0.66745600  |
| H | 3.42576300  | 1.51929400  | 0.02020300  |
| H | -3.41765800 | -2.15181000 | -0.68059100 |
| H | -4.14807500 | 0.38197300  | -0.70299700 |
| H | -4.47612300 | -0.47053000 | 0.78262200  |
| H | -2.47510600 | 0.42891600  | 1.85004900  |
| H | -3.29017700 | 1.79353000  | 1.09920300  |



**3a-Z<sub>out</sub>**

|   |             |             |             |
|---|-------------|-------------|-------------|
| C | -1.50851300 | 0.93274300  | 0.17361300  |
| C | -0.65615500 | -0.20955200 | 0.04542100  |
| C | -1.30501000 | -1.58320800 | 0.12289400  |
| C | 0.71898200  | -0.11574200 | -0.07965000 |
| C | 1.43179300  | 1.07914500  | -0.46148600 |
| C | 1.55794100  | -1.35382100 | 0.06778200  |
| C | 2.78241900  | 1.11032500  | -0.56306000 |
| C | 2.91889200  | -1.02875000 | 0.68072400  |
| H | 1.04801900  | -2.09569000 | 0.67774800  |
| H | 1.69892200  | -1.79759000 | -0.92594400 |
| C | 3.66796500  | -0.01811700 | -0.17108400 |
| H | 4.04540900  | -0.48835900 | -1.08688900 |
| H | 4.54678600  | 0.36773700  | 0.34646900  |
| H | 0.88591200  | 1.94470600  | -0.79706500 |
| H | -1.23891200 | -1.99133500 | 1.13882100  |
| H | -0.76025000 | -2.27671900 | -0.51482100 |
| C | -1.08384300 | 2.32253800  | 0.53045600  |
| H | -0.17801600 | 2.32146700  | 1.12681700  |
| H | -0.90915700 | 2.91426300  | -0.36842400 |
| H | -1.87601600 | 2.81018800  | 1.09707800  |
| H | 3.49529800  | -1.94521700 | 0.79204200  |
| H | 2.76692400  | -0.61692000 | 1.68030100  |
| C | -2.74042300 | -1.56919000 | -0.30164100 |
| H | -3.22467100 | -2.49639300 | -0.56952200 |
| C | -3.44452100 | -0.43917800 | -0.31575900 |
| N | -2.81320000 | 0.76640800  | 0.05360300  |
| H | -3.40218800 | 1.57386000  | 0.21222500  |
| H | -4.48547400 | -0.35406000 | -0.58080200 |
| H | 3.24265100  | 2.00203700  | -0.97252000 |

**3b- $E_{out}$** 

|   |             |             |             |
|---|-------------|-------------|-------------|
| C | -2.45772400 | 0.88876100  | -0.31071000 |
| C | -1.65014000 | -0.29062700 | -0.30462300 |
| C | -2.36626700 | -1.62875100 | -0.19581700 |
| C | -0.27259100 | -0.26446300 | -0.43973300 |
| C | 0.43281600  | -1.49424900 | -0.68637200 |
| C | 0.60373400  | 0.94445800  | -0.32311200 |
| C | 1.78310700  | -1.57162300 | -0.60673800 |
| C | 1.87402800  | 0.65445300  | 0.50600500  |
| H | 0.89896200  | 1.27518000  | -1.32424600 |
| H | 0.09163700  | 1.76984200  | 0.16180400  |
| C | 2.69406200  | -0.46902000 | -0.18220300 |
| H | -0.11511500 | -2.37341100 | -0.99283600 |
| H | -1.73093900 | -2.33181700 | 0.33953500  |
| H | -2.53785400 | -2.06457100 | -1.18766600 |
| C | -2.05976800 | 2.23998800  | -0.81796200 |
| H | -1.67669900 | 2.86070900  | -0.00825500 |
| H | -1.30207400 | 2.16994500  | -1.58953400 |
| H | -2.93280000 | 2.74068700  | -1.23501900 |
| N | -3.71421400 | 0.79840200  | 0.09010400  |
| C | -4.30464100 | -0.35650400 | 0.64063600  |
| H | -5.25804900 | -0.20612200 | 1.11974000  |
| C | -3.67365900 | -1.52372000 | 0.52556200  |
| H | -4.13027000 | -2.41331500 | 0.93316100  |
| H | -4.28529900 | 1.63093500  | 0.02437400  |
| C | 3.76136100  | -1.06686600 | 0.74410000  |
| H | 3.32353900  | -1.58630100 | 1.59386400  |
| H | 4.36927600  | -1.78143300 | 0.18900700  |
| H | 4.42627500  | -0.28956400 | 1.11900000  |
| C | 3.40674300  | 0.02246600  | -1.45801900 |
| H | 4.21547800  | 0.70410800  | -1.19853100 |
| H | 3.84417200  | -0.82391400 | -1.98731200 |
| H | 2.72876500  | 0.52749000  | -2.14500000 |
| C | 2.65752700  | 1.96217200  | 0.60187500  |
| H | 2.85457600  | 2.39406000  | -0.37807600 |
| H | 2.08816400  | 2.69011100  | 1.18153500  |
| H | 3.61001400  | 1.81598700  | 1.11001700  |
| C | 1.44627200  | 0.24509900  | 1.91887200  |
| H | 2.29945000  | 0.22978300  | 2.59435500  |
| H | 0.73324000  | 0.97223100  | 2.31209700  |
| H | 0.97704300  | -0.73853500 | 1.94456600  |
| H | 2.25884700  | -2.51033400 | -0.87788300 |

**3b-Z<sub>in</sub>**

|   |             |             |             |
|---|-------------|-------------|-------------|
| C | 3.63914600  | -1.64176200 | -0.40593700 |
| C | 2.18250600  | -1.57416400 | -0.06603900 |
| C | 1.64294600  | -0.15203100 | -0.08162700 |
| C | 2.56595800  | 0.90891900  | 0.17779500  |
| H | 4.07020500  | -2.58201000 | -0.71593400 |
| H | 1.62838300  | -2.17838200 | -0.78166700 |
| H | 2.02345800  | -2.04216400 | 0.91296300  |
| C | 0.28947700  | 0.06234000  | -0.27534900 |
| C | -0.31248300 | 1.33157400  | -0.58971000 |
| C | -0.66137100 | -1.09372700 | -0.26376100 |
| C | -1.65754400 | 1.48013800  | -0.64206100 |
| C | -1.99399000 | -0.74594200 | 0.42905000  |
| H | -0.85255000 | -1.39995000 | -1.29877000 |
| H | -0.23299500 | -1.95395100 | 0.24871100  |
| C | -2.67038700 | 0.43176200  | -0.32109000 |
| C | 2.21953500  | 2.30119300  | 0.60185100  |
| H | 2.14166400  | 2.95915700  | -0.26394500 |
| H | 1.27979700  | 2.32969700  | 1.14291900  |
| H | 3.00755700  | 2.69238900  | 1.24415800  |
| H | 0.30140400  | 2.16747300  | -0.88265700 |
| N | 3.86089300  | 0.65097000  | 0.12619300  |
| C | 4.42381700  | -0.57186300 | -0.29342100 |
| H | 5.48283300  | -0.54993700 | -0.49129200 |
| H | 4.49559600  | 1.39832500  | 0.37572300  |
| C | -3.78988100 | 1.08539000  | 0.49964800  |
| H | -3.41241900 | 1.57037200  | 1.39739600  |
| H | -4.29450500 | 1.83979100  | -0.10418900 |
| H | -4.53446500 | 0.34625800  | 0.79321300  |
| C | -3.27682900 | -0.00606500 | -1.66932200 |
| H | -4.14665500 | -0.63977200 | -1.50263300 |
| H | -3.60694600 | 0.86889200  | -2.22915000 |
| H | -2.56301600 | -0.54670700 | -2.28970600 |
| C | -2.85597200 | -2.00662300 | 0.42287300  |
| H | -2.39032500 | -2.77284200 | 1.04399300  |
| H | -3.84563500 | -1.81085900 | 0.83424500  |
| H | -2.97516400 | -2.41538500 | -0.57914100 |
| C | -1.69422000 | -0.37512000 | 1.88552700  |
| H | -2.61094600 | -0.31434300 | 2.46895200  |
| H | -1.06927000 | -1.14565700 | 2.34050300  |
| H | -1.17574600 | 0.58022300  | 1.97322600  |
| H | -2.05076300 | 2.43848200  | -0.97083500 |

**3b- $E_{in}$** 

|   |             |             |             |
|---|-------------|-------------|-------------|
| C | 2.45772500  | 0.88876000  | -0.31071100 |
| C | 1.65014000  | -0.29062700 | -0.30462200 |
| C | 2.36626900  | -1.62875100 | -0.19581900 |
| C | 0.27259200  | -0.26446400 | -0.43973200 |
| C | -0.43281600 | -1.49424900 | -0.68637100 |
| C | -0.60373400 | 0.94445700  | -0.32311200 |
| C | -1.78310700 | -1.57162300 | -0.60673700 |
| C | -1.87402900 | 0.65445300  | 0.50600500  |
| H | -0.09163600 | 1.76984200  | 0.16180400  |
| H | -0.89896200 | 1.27517900  | -1.32424500 |
| C | -2.69406300 | -0.46902000 | -0.18220400 |
| H | 0.11511500  | -2.37341100 | -0.99283500 |
| H | 2.53785900  | -2.06456600 | -1.18766900 |
| H | 1.73094000  | -2.33182000 | 0.33952700  |
| C | 2.05976900  | 2.23998800  | -0.81796000 |
| H | 1.30207600  | 2.16994800  | -1.58953300 |
| H | 1.67669700  | 2.86070700  | -0.00825100 |
| H | 2.93280000  | 2.74069000  | -1.23501400 |
| N | 3.71421700  | 0.79840000  | 0.09009900  |
| C | 4.30464100  | -0.35650500 | 0.64063700  |
| H | 5.25804800  | -0.20612100 | 1.11974300  |
| C | 3.67365700  | -1.52372000 | 0.52556500  |
| H | 4.13026300  | -2.41331400 | 0.93317100  |
| H | 4.28530100  | 1.63093300  | 0.02436800  |
| C | -3.76136200 | -1.06686600 | 0.74410000  |
| H | -4.36927700 | -1.78143300 | 0.18900500  |
| H | -3.32354100 | -1.58630100 | 1.59386400  |
| H | -4.42627600 | -0.28956400 | 1.11899900  |
| C | -3.40674200 | 0.02246500  | -1.45802000 |
| H | -3.84417100 | -0.82391500 | -1.98731300 |
| H | -4.21547800 | 0.70410600  | -1.19853300 |
| H | -2.72876400 | 0.52748900  | -2.14500000 |
| C | -2.65752700 | 1.96217200  | 0.60187400  |
| H | -2.08816400 | 2.69011200  | 1.18153300  |
| H | -2.85457700 | 2.39406000  | -0.37807700 |
| H | -3.61001400 | 1.81598800  | 1.11001700  |
| C | -1.44627400 | 0.24510000  | 1.91887300  |
| H | -0.73324300 | 0.97223200  | 2.31209800  |
| H | -2.29945300 | 0.22978500  | 2.59435400  |
| H | -0.97704400 | -0.73853400 | 1.94456800  |
| H | -2.25884700 | -2.51033500 | -0.87788100 |

**3b-Z<sub>out</sub>**

|   |             |             |             |
|---|-------------|-------------|-------------|
| C | -2.56571500 | 0.90895000  | 0.17771600  |
| C | -1.64287300 | -0.15218600 | -0.08170000 |
| C | -2.18268600 | -1.57423200 | -0.06596300 |
| C | -0.28950700 | 0.06215300  | -0.27586400 |
| C | 0.31251300  | 1.33139700  | -0.59018800 |
| C | 0.66152100  | -1.09383700 | -0.26465500 |
| C | 1.65754700  | 1.47996000  | -0.64250500 |
| C | 1.99370900  | -0.74603100 | 0.42889600  |
| C | 2.67041100  | 0.43175300  | -0.32096900 |
| H | -0.30138400 | 2.16728800  | -0.88320500 |
| H | -2.02351200 | -2.04230500 | 0.91298200  |
| H | -1.62881100 | -2.17855700 | -0.78170200 |
| C | -2.21886900 | 2.30105100  | 0.60199600  |
| H | -1.27897600 | 2.32919600  | 1.14280900  |
| H | -2.14106500 | 2.95923700  | -0.26364600 |
| H | -3.00665100 | 2.69230800  | 1.24456900  |
| C | -3.63938100 | -1.64157300 | -0.40558400 |
| H | -4.07074200 | -2.58181000 | -0.71520300 |
| C | -4.42383300 | -0.57149600 | -0.29331400 |
| N | -3.86068900 | 0.65135600  | 0.12598900  |
| H | -4.49525000 | 1.39880900  | 0.37557800  |
| H | -5.48287100 | -0.54948300 | -0.49106200 |
| C | 1.69325500  | -0.37532900 | 1.88529700  |
| H | 1.06817800  | -1.14599300 | 2.33987300  |
| H | 2.60975500  | -0.31454400 | 2.46907400  |
| H | 1.17466700  | 0.57995800  | 1.97288400  |
| C | 2.85586700  | -2.00662600 | 0.42311500  |
| H | 2.97560800  | -2.41536500 | -0.57884500 |
| H | 3.84530600  | -1.81065500 | 0.83493400  |
| H | 2.39001800  | -2.77287700 | 1.04402300  |
| H | 2.05081000  | 2.43818700  | -0.97155500 |
| H | 0.85322200  | -1.39927200 | -1.29979500 |
| H | 0.23311300  | -1.95443700 | 0.24713400  |
| C | 3.78920900  | 1.08573100  | 0.50054100  |
| H | 4.53381700  | 0.34678400  | 0.79454600  |
| H | 4.29399900  | 1.84026600  | -0.10298700 |
| H | 3.41105200  | 1.57057900  | 1.39806700  |
| C | 3.27784600  | -0.00615800 | -1.66866900 |
| H | 3.60820900  | 0.86877800  | -2.22839500 |
| H | 4.14765700  | -0.63972800 | -1.50137000 |
| H | 2.56458800  | -0.54702500 | -2.28952600 |

**3c- $E_{out}$** 

|    |             |             |             |
|----|-------------|-------------|-------------|
| C  | -3.01175900 | 0.88616600  | -0.37370000 |
| C  | -2.23569000 | -0.32417300 | -0.36352200 |
| C  | -2.99180200 | -1.63861300 | -0.25040800 |
| C  | -0.86032500 | -0.33575300 | -0.48011700 |
| C  | -0.17849900 | -1.59009100 | -0.68628200 |
| C  | 0.02709000  | 0.87322000  | -0.38611400 |
| C  | 1.16702200  | -1.71220400 | -0.63939000 |
| C  | 1.29926900  | 0.54720100  | 0.39923800  |
| H  | 0.33255200  | 1.21127600  | -1.37988400 |
| H  | -0.44407900 | 1.69515000  | 0.13827000  |
| C  | 2.08055500  | -0.57842800 | -0.31307800 |
| H  | -0.74675200 | -2.47162600 | -0.94242800 |
| H  | -2.39077800 | -2.34967000 | 0.31325700  |
| H  | -3.15229400 | -2.08575200 | -1.23904600 |
| C  | -2.57045100 | 2.22131400  | -0.88464400 |
| H  | -2.14108800 | 2.82078000  | -0.08170700 |
| H  | -1.83606500 | 2.12290300  | -1.67612100 |
| H  | -3.42942900 | 2.76307700  | -1.27813200 |
| N  | -4.26383500 | 0.83037700  | 0.03115400  |
| C  | -4.90450800 | -0.30917800 | 0.56016300  |
| H  | -5.86205100 | -0.12975100 | 1.02024700  |
| C  | -4.31289900 | -1.49569800 | 0.43620500  |
| H  | -4.81011900 | -2.37659100 | 0.81441300  |
| H  | -4.80780000 | 1.68296200  | -0.02911500 |
| Cl | 3.43684800  | -1.15282000 | 0.65576100  |
| Cl | 2.68784500  | 0.01704700  | -1.89024500 |
| Cl | 2.26914600  | 2.01105800  | 0.55821300  |
| Cl | 0.80848400  | -0.01077100 | 2.02218100  |
| H  | 1.64722700  | -2.65470200 | -0.86842300 |

**3c-Z<sub>in</sub>**

|    |             |             |             |
|----|-------------|-------------|-------------|
| C  | -4.18412800 | 1.66391900  | -0.46812300 |
| C  | -2.73303700 | 1.56028300  | -0.11801200 |
| C  | -2.22326800 | 0.13005900  | -0.14260300 |
| C  | -3.17478000 | -0.91577100 | 0.11970200  |
| H  | -4.59187600 | 2.61889500  | -0.76466900 |
| H  | -2.16240600 | 2.16263600  | -0.82240000 |
| H  | -2.57308900 | 2.01286800  | 0.86888000  |
| C  | -0.87948900 | -0.11597300 | -0.32882200 |
| C  | -0.30345500 | -1.40369500 | -0.62878400 |
| C  | 0.08495600  | 1.03566500  | -0.31346500 |
| C  | 1.03140900  | -1.60380900 | -0.69101000 |
| C  | 1.38870600  | 0.62592300  | 0.36947800  |
| H  | 0.31764300  | 1.35632200  | -1.33347900 |
| H  | -0.30545200 | 1.88810700  | 0.23519700  |
| C  | 2.03880000  | -0.54001400 | -0.40681500 |
| C  | -2.85501800 | -2.30108700 | 0.58257900  |
| H  | -2.76710300 | -2.98074100 | -0.26548900 |
| H  | -1.92728000 | -2.32326700 | 1.14546200  |
| H  | -3.66001000 | -2.66952100 | 1.21704900  |
| H  | -0.93677700 | -2.23051300 | -0.90397500 |
| N  | -4.45697800 | -0.62735600 | 0.04150200  |
| C  | -4.99211100 | 0.60878400  | -0.38036800 |
| H  | -6.04957100 | 0.60844900  | -0.58680900 |
| H  | -5.11313800 | -1.35748900 | 0.29253500  |
| Cl | 3.41444100  | -1.22420300 | 0.45935800  |
| Cl | 2.57966700  | 0.04102100  | -2.01311400 |
| Cl | 0.97567400  | 0.07179500  | 2.01975900  |
| Cl | 2.46212500  | 2.01726800  | 0.47893300  |
| H  | 1.43397700  | -2.55993100 | -0.99929100 |

**3c- $E_{in}$** 

|    |             |             |             |
|----|-------------|-------------|-------------|
| C  | 3.01176100  | 0.88616900  | -0.37369600 |
| C  | 2.23569100  | -0.32416900 | -0.36353700 |
| C  | 2.99180700  | -1.63860800 | -0.25043700 |
| C  | 0.86032600  | -0.33574600 | -0.48013800 |
| C  | 0.17849400  | -1.59007700 | -0.68632500 |
| C  | -0.02708800 | 0.87322500  | -0.38610200 |
| C  | -1.16702500 | -1.71218900 | -0.63943000 |
| C  | -1.29926400 | 0.54719100  | 0.39925300  |
| H  | 0.44408400  | 1.69514400  | 0.13829400  |
| H  | -0.33256000 | 1.21130200  | -1.37986400 |
| C  | -2.08055800 | -0.57842000 | -0.31309400 |
| H  | 0.74674300  | -2.47160900 | -0.94249500 |
| H  | 3.15232700  | -2.08572200 | -1.23908200 |
| H  | 2.39077300  | -2.34968600 | 0.31319200  |
| C  | 2.57046200  | 2.22132100  | -0.88463800 |
| H  | 1.83609000  | 2.12291700  | -1.67612900 |
| H  | 2.14108400  | 2.82078300  | -0.08170600 |
| H  | 3.42944600  | 2.76308900  | -1.27810700 |
| N  | 4.26383500  | 0.83037400  | 0.03116500  |
| C  | 4.90449500  | -0.30918500 | 0.56018100  |
| H  | 5.86203000  | -0.12976300 | 1.02028400  |
| C  | 4.31288500  | -1.49570200 | 0.43621300  |
| H  | 4.81009500  | -2.37659600 | 0.81443100  |
| H  | 4.80780500  | 1.68295700  | -0.02909400 |
| H  | -1.64723100 | -2.65468200 | -0.86848100 |
| Cl | -3.43684600 | -1.15283300 | 0.65574300  |
| Cl | -2.68785200 | 0.01709800  | -1.89023700 |
| Cl | -2.26914100 | 2.01104600  | 0.55825900  |
| Cl | -0.80848200 | -0.01081700 | 2.02218300  |



**3c-Z<sub>out</sub>**

|    |             |             |             |
|----|-------------|-------------|-------------|
| C  | 3.17478000  | -0.91577100 | 0.11970200  |
| C  | 2.22326800  | 0.13005900  | -0.14260300 |
| C  | 2.73303700  | 1.56028300  | -0.11801200 |
| C  | 0.87948900  | -0.11597300 | -0.32882200 |
| C  | 0.30345500  | -1.40369500 | -0.62878400 |
| C  | -0.08495600 | 1.03566500  | -0.31346500 |
| C  | -1.03140900 | -1.60380900 | -0.69101000 |
| C  | -1.38870600 | 0.62592300  | 0.36947800  |
| H  | 0.30545200  | 1.88810700  | 0.23519700  |
| H  | -0.31764300 | 1.35632200  | -1.33347900 |
| C  | -2.03880000 | -0.54001400 | -0.40681500 |
| H  | 0.93677700  | -2.23051300 | -0.90397500 |
| H  | 2.57308900  | 2.01286800  | 0.86888000  |
| H  | 2.16240600  | 2.16263600  | -0.82240000 |
| C  | 2.85501800  | -2.30108700 | 0.58257900  |
| H  | 1.92728000  | -2.32326700 | 1.14546200  |
| H  | 2.76710300  | -2.98074100 | -0.26548900 |
| H  | 3.66001000  | -2.66952100 | 1.21704900  |
| C  | 4.18412800  | 1.66391900  | -0.46812300 |
| H  | 4.59187600  | 2.61889500  | -0.76466900 |
| C  | 4.99211100  | 0.60878400  | -0.38036800 |
| N  | 4.45697800  | -0.62735600 | 0.04150200  |
| H  | 5.11313800  | -1.35748900 | 0.29253500  |
| H  | 6.04957100  | 0.60844900  | -0.58680900 |
| Cl | -3.41444100 | -1.22420300 | 0.45935800  |
| Cl | -2.57966700 | 0.04102100  | -2.01311400 |
| Cl | -0.97567400 | 0.07179500  | 2.01975900  |
| Cl | -2.46212500 | 2.01726800  | 0.47893400  |
| H  | -1.43397700 | -2.55993100 | -0.99929100 |

**3d- $E_{out}$** 

|    |             |             |             |
|----|-------------|-------------|-------------|
| C  | 3.74794500  | 0.81681400  | 0.55922000  |
| C  | 2.97375100  | -0.39083200 | 0.52157700  |
| C  | 3.72441300  | -1.70837500 | 0.40323500  |
| C  | 1.59510000  | -0.40602800 | 0.61403900  |
| C  | 0.91643400  | -1.66111500 | 0.80305300  |
| C  | 0.70470700  | 0.80066800  | 0.51586700  |
| C  | -0.43098700 | -1.78571100 | 0.74241700  |
| C  | -0.55603600 | 0.47330300  | -0.28790800 |
| H  | 0.38606900  | 1.12826600  | 1.51033200  |
| H  | 1.18400400  | 1.62821700  | 0.00869500  |
| C  | -1.33791200 | -0.65946500 | 0.39551100  |
| H  | 1.48260700  | -2.54232700 | 1.06545000  |
| H  | 3.14073000  | -2.39598900 | -0.20710800 |
| H  | 3.83492200  | -2.18634900 | 1.38425200  |
| C  | 3.28893300  | 2.15303900  | 1.05190300  |
| H  | 2.87652500  | 2.74598800  | 0.23528000  |
| H  | 2.53600900  | 2.05630900  | 1.82608900  |
| H  | 4.13584200  | 2.70071300  | 1.46297200  |
| N  | 5.01483500  | 0.76317900  | 0.19851400  |
| C  | 5.67537500  | -0.37524800 | -0.30619000 |
| H  | 6.65358100  | -0.19640400 | -0.72084800 |
| C  | 5.07637400  | -1.56127500 | -0.21833000 |
| H  | 5.58931900  | -2.44012300 | -0.57994200 |
| H  | 5.55471100  | 1.61637200  | 0.27826400  |
| Br | -2.02032200 | -0.06238300 | 2.12874900  |
| Br | -2.80616800 | -1.29905100 | -0.66447800 |
| Br | -1.60249900 | 2.07198400  | -0.48105900 |
| Br | 0.03357800  | -0.10775800 | -2.05164500 |
| H  | -0.90736100 | -2.72927400 | 0.97576200  |

**3d-Z<sub>in</sub>**

|    |             |             |             |
|----|-------------|-------------|-------------|
| C  | -4.92680400 | 1.50646800  | -0.87820500 |
| C  | -3.47724200 | 1.44767800  | -0.51142800 |
| C  | -2.97532300 | 0.02647300  | -0.32824900 |
| C  | -3.93093400 | -0.96953000 | 0.06612500  |
| H  | -5.32962700 | 2.41180800  | -1.30742800 |
| H  | -2.90047600 | 1.94021400  | -1.29232300 |
| H  | -3.31752800 | 2.03549900  | 0.40165700  |
| C  | -1.62786800 | -0.24512100 | -0.44821800 |
| C  | -1.05088600 | -1.55903400 | -0.56203500 |
| C  | -0.65847100 | 0.89671000  | -0.56421000 |
| C  | 0.28694900  | -1.76535400 | -0.55771400 |
| C  | 0.61887200  | 0.58010200  | 0.21309700  |
| H  | -0.39083900 | 1.06656300  | -1.61268800 |
| H  | -1.06558200 | 1.81883800  | -0.15978000 |
| C  | 1.28416700  | -0.67847600 | -0.36589900 |
| C  | -3.61641400 | -2.27931800 | 0.71466800  |
| H  | -3.51859600 | -3.06740800 | -0.03242200 |
| H  | -2.69412100 | -2.22241400 | 1.28472600  |
| H  | -4.42800900 | -2.56004100 | 1.38465100  |
| H  | -1.67830200 | -2.41380200 | -0.75340700 |
| N  | -5.21299300 | -0.69108500 | -0.05618100 |
| C  | -5.73997700 | 0.47736500  | -0.64630300 |
| H  | -6.79673000 | 0.45371100  | -0.85516400 |
| H  | -5.87271000 | -1.37801000 | 0.28877000  |
| Br | 2.74901800  | -1.31117400 | 0.70437700  |
| Br | 1.93132500  | -0.32279500 | -2.17713300 |
| Br | 0.07325300  | 0.23862300  | 2.05711000  |
| Br | 1.78002300  | 2.10614500  | 0.18697500  |
| H  | 0.69038300  | -2.75311700 | -0.73964400 |

**3d- $E_{in}$** 

|    |             |             |             |
|----|-------------|-------------|-------------|
| C  | -3.74794500 | 0.81678700  | 0.55925500  |
| C  | -2.97375300 | -0.39086000 | 0.52155400  |
| C  | -3.72442100 | -1.70839400 | 0.40315800  |
| C  | -1.59510200 | -0.40606300 | 0.61400700  |
| C  | -0.91643600 | -1.66116000 | 0.80295600  |
| C  | -0.70471100 | 0.80063900  | 0.51589300  |
| C  | 0.43098400  | -1.78575200 | 0.74231600  |
| C  | 0.55603800  | 0.47331600  | -0.28788900 |
| H  | -1.18400800 | 1.62820900  | 0.00875600  |
| H  | -0.38608000 | 1.12819300  | 1.51037600  |
| C  | 1.33791100  | -0.65948600 | 0.39547600  |
| H  | -1.48260900 | -2.54238700 | 1.06530400  |
| H  | -3.83493400 | -2.18640800 | 1.38415500  |
| H  | -3.14074200 | -2.39598600 | -0.20721300 |
| C  | -3.28892900 | 2.15298600  | 1.05200400  |
| H  | -2.53600300 | 2.05621600  | 1.82618300  |
| H  | -2.87652400 | 2.74597500  | 0.23541000  |
| H  | -4.13583600 | 2.70064100  | 1.46310400  |
| N  | -5.01483400 | 0.76317300  | 0.19854400  |
| C  | -5.67537600 | -0.37522900 | -0.30621500 |
| H  | -6.65357800 | -0.19636200 | -0.72087200 |
| C  | -5.07638000 | -1.56126200 | -0.21840500 |
| H  | -5.58932700 | -2.44009100 | -0.58006000 |
| H  | -5.55470900 | 1.61636200  | 0.27833800  |
| H  | 0.90735900  | -2.72932700 | 0.97560900  |
| Br | 2.80617900  | -1.29901100 | -0.66453100 |
| Br | 2.02030200  | -0.06249400 | 2.12875400  |
| Br | 1.60249900  | 2.07200900  | -0.48095000 |
| Br | -0.03356400 | -0.10765800 | -2.05166000 |

**3d-Z<sub>out</sub>**

|    |             |             |             |
|----|-------------|-------------|-------------|
| C  | 3.93093400  | -0.96953000 | 0.06612600  |
| C  | 2.97532300  | 0.02647300  | -0.32824900 |
| C  | 3.47724200  | 1.44767800  | -0.51142800 |
| C  | 1.62786800  | -0.24512100 | -0.44821800 |
| C  | 1.05088600  | -1.55903400 | -0.56203500 |
| C  | 0.65847100  | 0.89671000  | -0.56421000 |
| C  | -0.28694900 | -1.76535400 | -0.55771400 |
| C  | -0.61887200 | 0.58010200  | 0.21309700  |
| H  | 1.06558200  | 1.81883800  | -0.15978000 |
| H  | 0.39083900  | 1.06656300  | -1.61268800 |
| C  | -1.28416700 | -0.67847700 | -0.36589900 |
| H  | 1.67830200  | -2.41380300 | -0.75340600 |
| H  | 3.31752800  | 2.03549900  | 0.40165700  |
| H  | 2.90047600  | 1.94021400  | -1.29232300 |
| C  | 3.61641400  | -2.27931800 | 0.71466800  |
| H  | 2.69412100  | -2.22241400 | 1.28472600  |
| H  | 3.51859600  | -3.06740800 | -0.03242200 |
| H  | 4.42800900  | -2.56004100 | 1.38465100  |
| C  | 4.92680400  | 1.50646700  | -0.87820500 |
| H  | 5.32962600  | 2.41180800  | -1.30742800 |
| C  | 5.73997700  | 0.47736500  | -0.64630300 |
| N  | 5.21299300  | -0.69108500 | -0.05618100 |
| H  | 5.87271000  | -1.37801000 | 0.28877000  |
| H  | 6.79673000  | 0.45371100  | -0.85516400 |
| Br | -2.74901800 | -1.31117400 | 0.70437700  |
| Br | -1.93132500 | -0.32279500 | -2.17713300 |
| Br | -1.78002300 | 2.10614500  | 0.18697500  |
| Br | -0.07325300 | 0.23862300  | 2.05711000  |
| H  | -0.69038300 | -2.75311700 | -0.73964400 |

**4a- $E_{out}$** 

|   |             |             |             |
|---|-------------|-------------|-------------|
| C | -2.32515900 | 0.67223500  | -0.27754900 |
| C | -1.20469100 | -0.18613800 | -0.09124900 |
| C | -1.46543000 | -1.68358700 | 0.00666600  |
| C | 0.10878600  | 0.27265900  | -0.05076800 |
| C | 1.17106700  | -0.67732900 | -0.14394900 |
| C | 0.52428400  | 1.71031200  | 0.10930700  |
| C | 2.50245000  | -0.35276100 | -0.05782400 |
| C | 1.79395400  | 1.80409900  | 0.95224000  |
| H | 0.72406500  | 2.14645200  | -0.87582400 |
| H | -0.25928500 | 2.29497500  | 0.57830200  |
| C | 2.92946800  | 1.03603100  | 0.29831600  |
| H | 2.06690700  | 2.85026100  | 1.08141500  |
| H | 1.59764300  | 1.39129800  | 1.94353800  |
| H | 3.79781000  | 0.99599900  | 0.95511700  |
| H | 3.25407400  | 1.54520500  | -0.61599100 |
| H | 0.93616300  | -1.70624500 | -0.37718700 |
| H | -0.76584500 | -2.12130900 | 0.71789800  |
| H | -1.27122000 | -2.17689000 | -0.95373300 |
| C | -2.29611000 | 2.09333400  | -0.74971500 |
| H | -2.22562000 | 2.78222700  | 0.09153500  |
| H | -1.46401800 | 2.27736700  | -1.41890100 |
| H | -3.21916900 | 2.31627500  | -1.28306500 |
| N | -3.54496800 | 0.18530600  | -0.09432600 |
| C | 3.48280100  | -1.37786100 | -0.33587700 |
| H | 3.10135700  | -2.36486400 | -0.57032100 |
| C | 4.81338600  | -1.17391200 | -0.34309100 |
| H | 5.24782100  | -0.20845900 | -0.12763700 |
| H | 5.49192600  | -1.98109500 | -0.57634000 |
| C | -3.83360200 | -1.10545900 | 0.38349200  |
| H | -4.86008600 | -1.27826900 | 0.66242900  |
| C | -2.85669800 | -2.00796600 | 0.45105200  |
| H | -3.08044900 | -3.00240300 | 0.80728900  |
| H | -4.32433400 | 0.80038400  | -0.28456400 |

**4a-Z<sub>in</sub>**

|   |             |             |             |
|---|-------------|-------------|-------------|
| C | -3.58120000 | 1.00140200  | -0.66749300 |
| C | -2.24271200 | 1.42113600  | -0.14308200 |
| C | -1.29844700 | 0.24458600  | 0.05144700  |
| C | -1.87582300 | -1.03283800 | 0.30189800  |
| H | -4.22658400 | 1.73420400  | -1.12822000 |
| H | -1.79892600 | 2.13046400  | -0.83946000 |
| H | -2.38355700 | 1.96941000  | 0.79670100  |
| C | 0.07315400  | 0.47608900  | 0.05067600  |
| C | 1.06731300  | -0.53791900 | -0.09556000 |
| C | 0.56935100  | 1.89362500  | 0.09813300  |
| C | 2.41387000  | -0.27914900 | -0.13396300 |
| C | 1.91726100  | 1.97516300  | 0.80581500  |
| H | 0.66769500  | 2.26736800  | -0.92892800 |
| H | -0.15311200 | 2.53475700  | 0.59911900  |
| C | 2.94574000  | 1.09703900  | 0.11433200  |
| H | 2.25576500  | 3.00954000  | 0.83216800  |
| H | 1.79534000  | 1.64639600  | 1.83967300  |
| H | 3.85951900  | 1.03699300  | 0.70490700  |
| H | 3.22934600  | 1.53188900  | -0.85061500 |
| C | -1.18526300 | -2.21927400 | 0.89868100  |
| H | -0.79806700 | -2.87529200 | 0.11843300  |
| H | -0.36384400 | -1.92059200 | 1.54139800  |
| H | -1.89826700 | -2.79473800 | 1.48795400  |
| H | 0.76636000  | -1.55034100 | -0.31412700 |
| N | -3.17025700 | -1.20467100 | 0.07499000  |
| C | 3.31300600  | -1.36309200 | -0.46626900 |
| H | 2.86217300  | -2.33463400 | -0.63403500 |
| C | 4.64602300  | -1.23423800 | -0.59690200 |
| H | 5.14868300  | -0.28900800 | -0.45200000 |
| H | 5.25703400  | -2.08441000 | -0.86177700 |
| C | -4.00957700 | -0.25276200 | -0.53480800 |
| H | -4.97020300 | -0.61996900 | -0.85691600 |
| H | -3.57371800 | -2.09794900 | 0.32337100  |

**4a- $E_{in}$** 

|   |             |             |             |
|---|-------------|-------------|-------------|
| C | 2.32515800  | 0.67223600  | -0.27755200 |
| C | 1.20469200  | -0.18613700 | -0.09123800 |
| C | 1.46543600  | -1.68358500 | 0.00666500  |
| C | -0.10878600 | 0.27265700  | -0.05075100 |
| C | -1.17106600 | -0.67733200 | -0.14392900 |
| C | -0.52428700 | 1.71031100  | 0.10931500  |
| C | -2.50245000 | -0.35276400 | -0.05782000 |
| C | -1.79396600 | 1.80410400  | 0.95223300  |
| H | 0.25927800  | 2.29497400  | 0.57831800  |
| H | -0.72405200 | 2.14644800  | -0.87582000 |
| C | -2.92947200 | 1.03603200  | 0.29830300  |
| H | -3.25406900 | 1.54519700  | -0.61601300 |
| H | -3.79782200 | 0.99600400  | 0.95509400  |
| H | -0.93616100 | -1.70625100 | -0.37715600 |
| H | 1.27124000  | -2.17687600 | -0.95374200 |
| H | 0.76584800  | -2.12131900 | 0.71788500  |
| C | 2.29610700  | 2.09334000  | -0.74970200 |
| H | 1.46402800  | 2.27737300  | -1.41890600 |
| H | 2.22558800  | 2.78222100  | 0.09155500  |
| H | 3.21917600  | 2.31629900  | -1.28302500 |
| H | -2.06691900 | 2.85026700  | 1.08139600  |
| H | -1.59766700 | 1.39131000  | 1.94353500  |
| N | 3.54496900  | 0.18530100  | -0.09435400 |
| C | -3.48279900 | -1.37786700 | -0.33587300 |
| H | -3.10135200 | -2.36487200 | -0.57030400 |
| C | -4.81338300 | -1.17391800 | -0.34310500 |
| H | -5.24782000 | -0.20846300 | -0.12766500 |
| H | -5.49192000 | -1.98110400 | -0.57635200 |
| C | 3.83360800  | -1.10545700 | 0.38348000  |
| H | 4.86009300  | -1.27826100 | 0.66241600  |
| C | 2.85670200  | -2.00796200 | 0.45106200  |
| H | 3.08045000  | -3.00239000 | 0.80732100  |
| H | 4.32433400  | 0.80038000  | -0.28459800 |



**4a-Z<sub>out</sub>**

|   |             |             |             |
|---|-------------|-------------|-------------|
| C | 1.87582300  | -1.03283800 | 0.30189800  |
| C | 1.29844700  | 0.24458600  | 0.05144700  |
| C | 2.24271200  | 1.42113600  | -0.14308200 |
| C | -0.07315400 | 0.47608900  | 0.05067600  |
| C | -1.06731300 | -0.53791900 | -0.09556000 |
| C | -0.56935100 | 1.89362500  | 0.09813300  |
| C | -2.41387000 | -0.27914900 | -0.13396300 |
| C | -1.91726100 | 1.97516300  | 0.80581500  |
| H | 0.15311200  | 2.53475700  | 0.59911900  |
| H | -0.66769500 | 2.26736800  | -0.92892800 |
| C | -2.94574000 | 1.09703900  | 0.11433200  |
| H | -3.22934600 | 1.53188900  | -0.85061500 |
| H | -3.85951900 | 1.03699300  | 0.70490700  |
| H | -0.76636000 | -1.55034100 | -0.31412700 |
| H | 2.38355700  | 1.96941000  | 0.79670100  |
| H | 1.79892600  | 2.13046400  | -0.83946000 |
| C | 1.18526300  | -2.21927400 | 0.89868100  |
| H | 0.36384400  | -1.92059200 | 1.54139800  |
| H | 0.79806700  | -2.87529200 | 0.11843300  |
| H | 1.89826700  | -2.79473800 | 1.48795400  |
| H | -2.25576500 | 3.00954000  | 0.83216800  |
| H | -1.79534000 | 1.64639600  | 1.83967300  |
| C | -3.31300600 | -1.36309200 | -0.46626900 |
| H | -2.86217300 | -2.33463400 | -0.63403500 |
| C | -4.64602300 | -1.23423800 | -0.59690200 |
| H | -5.14868300 | -0.28900800 | -0.45200000 |
| H | -5.25703400 | -2.08441000 | -0.86177700 |
| C | 3.58120000  | 1.00140200  | -0.66749300 |
| H | 4.22658400  | 1.73420400  | -1.12822000 |
| C | 4.00957700  | -0.25276200 | -0.53480800 |
| N | 3.17025700  | -1.20467100 | 0.07499000  |
| H | 3.57371800  | -2.09794900 | 0.32337100  |
| H | 4.97020300  | -0.61996900 | -0.85691600 |

**4b- $E_{out}$** 

|   |             |             |             |
|---|-------------|-------------|-------------|
| C | 2.90643700  | -0.63080500 | -0.49490800 |
| C | 1.91740200  | 0.34701400  | -0.19485600 |
| C | 2.38941800  | 1.74132100  | 0.19254600  |
| C | 0.55209500  | 0.09869600  | -0.28913700 |
| C | -0.35391000 | 1.19468400  | -0.24712800 |
| C | -0.09370900 | -1.24441200 | -0.39880300 |
| C | -1.72425400 | 1.07570000  | -0.19343200 |
| C | -1.35834100 | -1.32101000 | 0.47462500  |
| H | -0.36140000 | -1.44386000 | -1.44131800 |
| H | 0.57019900  | -2.03916800 | -0.07138500 |
| C | -2.40527600 | -0.26252300 | 0.00312800  |
| H | 0.04151000  | 2.19717900  | -0.33858100 |
| H | 1.70599600  | 2.15537300  | 0.93324800  |
| H | 2.35182400  | 2.42005700  | -0.66872700 |
| C | 2.69625200  | -1.91520600 | -1.23607500 |
| H | 2.48998500  | -2.73353700 | -0.54654900 |
| H | 1.87711100  | -1.84182900 | -1.94170300 |
| H | 3.60202100  | -2.16642300 | -1.78675100 |
| N | 4.16874200  | -0.38841600 | -0.16743600 |
| C | -2.44204800 | 2.33213800  | -0.35015800 |
| H | -1.80503000 | 3.21018200  | -0.32353800 |
| C | -3.75092800 | 2.55217200  | -0.58120000 |
| H | -4.48525300 | 1.76941300  | -0.66861800 |
| H | -4.10001800 | 3.56652200  | -0.71162300 |
| C | 4.60692000  | 0.72783600  | 0.56731200  |
| H | 5.62212300  | 0.67825800  | 0.92553600  |
| C | 3.77312200  | 1.74818300  | 0.76246400  |
| H | 4.11414400  | 2.60924100  | 1.31763000  |
| H | 4.86043800  | -1.07387300 | -0.43872100 |
| C | -3.51849300 | -0.14556300 | 1.06042800  |
| H | -3.19653500 | 0.42816600  | 1.92723200  |
| H | -4.40790000 | 0.32807400  | 0.65920800  |
| H | -3.81207700 | -1.13796200 | 1.39760100  |
| C | -3.03450900 | -0.67817800 | -1.34170400 |
| H | -3.67151200 | -1.55019500 | -1.20249800 |
| H | -3.64741800 | 0.12407200  | -1.74414000 |
| H | -2.28091800 | -0.91607800 | -2.09193700 |
| C | -1.88567900 | -2.75117100 | 0.34499200  |
| H | -2.02233800 | -3.04454600 | -0.69457700 |
| H | -1.16895200 | -3.43984400 | 0.79440900  |
| H | -2.83191700 | -2.88639400 | 0.86621200  |
| C | -0.95485700 | -1.09308400 | 1.93647600  |
| H | -1.76391300 | -1.36362500 | 2.61184100  |
| H | -0.10077800 | -1.72657000 | 2.18335600  |
| H | -0.67843200 | -0.05846900 | 2.13901300  |

**4b-Z<sub>in</sub>**

|   |             |             |             |
|---|-------------|-------------|-------------|
| C | 4.13476500  | -1.15631400 | -0.84941900 |
| C | 2.71407000  | -1.41787500 | -0.45352700 |
| C | 1.96612500  | -0.14217400 | -0.09892600 |
| C | 2.72641700  | 0.96055200  | 0.38332600  |
| H | 4.68026500  | -1.90495200 | -1.40422100 |
| H | 2.20470000  | -1.91929800 | -1.27461900 |
| H | 2.70131400  | -2.12396200 | 0.38599600  |
| C | 0.57868000  | -0.12746800 | -0.18289600 |
| C | -0.22579600 | 1.04585300  | -0.18524700 |
| C | -0.16778500 | -1.40498400 | -0.37978100 |
| C | -1.60082200 | 1.03921600  | -0.22158000 |
| C | -1.49562200 | -1.40106100 | 0.39262500  |
| H | -0.35505800 | -1.55050000 | -1.44987600 |
| H | 0.41755900  | -2.26034900 | -0.04322900 |
| C | -2.40787200 | -0.23833700 | -0.11105400 |
| C | 2.19729700  | 2.13904000  | 1.13879500  |
| H | 1.97297600  | 2.96433900  | 0.46219100  |
| H | 1.29594500  | 1.88680600  | 1.68792600  |
| H | 2.95171400  | 2.48679700  | 1.84373200  |
| H | 0.25058200  | 2.00939200  | -0.28032500 |
| N | 4.04411700  | 0.94048300  | 0.23978900  |
| C | -2.19823400 | 2.35525500  | -0.40652400 |
| H | -1.49081000 | 3.17457900  | -0.32573400 |
| C | -3.46540400 | 2.69485100  | -0.71105200 |
| H | -4.26005400 | 1.98286100  | -0.85589500 |
| H | -3.71412900 | 3.73815400  | -0.84294300 |
| C | 4.75362900  | -0.03298000 | -0.48950000 |
| H | 5.78053200  | 0.20933400  | -0.70907500 |
| H | 4.57105900  | 1.70048300  | 0.64843800  |
| C | -3.57861900 | -0.05100500 | 0.87095100  |
| H | -3.26988700 | 0.46585700  | 1.77749000  |
| H | -4.39169700 | 0.51294800  | 0.42695000  |
| H | -3.98239400 | -1.02192300 | 1.15217800  |
| C | -2.97331700 | -0.55936300 | -1.50917000 |
| H | -3.69449500 | -1.37238000 | -1.44253000 |
| H | -3.48027700 | 0.30548700  | -1.92871400 |
| H | -2.19113300 | -0.84782000 | -2.21091700 |
| C | -2.13367300 | -2.77412200 | 0.17606700  |
| H | -1.51162000 | -3.53657000 | 0.64656500  |
| H | -3.12235200 | -2.84062700 | 0.62725200  |
| H | -2.22097600 | -3.02240900 | -0.88024700 |
| C | -1.18226400 | -1.25185900 | 1.88711700  |
| H | -2.05873200 | -1.46774900 | 2.49461000  |
| H | -0.40626400 | -1.96462600 | 2.17202200  |
| H | -0.83505100 | -0.25060300 | 2.14321800  |

**4b- $E_{in}$** 

|   |             |             |             |
|---|-------------|-------------|-------------|
| C | -2.90643800 | -0.63080800 | -0.49490300 |
| C | -1.91740400 | 0.34701100  | -0.19484900 |
| C | -2.38942200 | 1.74131800  | 0.19255100  |
| C | -0.55209600 | 0.09869400  | -0.28912600 |
| C | 0.35390600  | 1.19468300  | -0.24711300 |
| C | 0.09370900  | -1.24441400 | -0.39879100 |
| C | 1.72425100  | 1.07570200  | -0.19342600 |
| C | 1.35835000  | -1.32101100 | 0.47462400  |
| H | -0.57019600 | -2.03916900 | -0.07136500 |
| H | 0.36138900  | -1.44386700 | -1.44130900 |
| C | 2.40527800  | -0.26252100 | 0.00312000  |
| H | -0.04151600 | 2.19717900  | -0.33855600 |
| H | -2.35182700 | 2.42005300  | -0.66872400 |
| H | -1.70600200 | 2.15537200  | 0.93325200  |
| C | -2.69625400 | -1.91520900 | -1.23607100 |
| H | -1.87711400 | -1.84183200 | -1.94170100 |
| H | -2.48998400 | -2.73354000 | -0.54654500 |
| H | -3.60202400 | -2.16642800 | -1.78674500 |
| N | -4.16874500 | -0.38841700 | -0.16743700 |
| C | 2.44204000  | 2.33214300  | -0.35014800 |
| H | 1.80502200  | 3.21018600  | -0.32350900 |
| C | 3.75091700  | 2.55218200  | -0.58120600 |
| H | 4.48524300  | 1.76942500  | -0.66864300 |
| H | 4.10000400  | 3.56653400  | -0.71162300 |
| C | -4.60692500 | 0.72783400  | 0.56731100  |
| H | -5.62212900 | 0.67825700  | 0.92553200  |
| C | -3.77312700 | 1.74818100  | 0.76246500  |
| H | -4.11415000 | 2.60923900  | 1.31763000  |
| H | -4.86044000 | -1.07387400 | -0.43872300 |
| C | 3.51850700  | -0.14556300 | 1.06040700  |
| H | 4.40790900  | 0.32807600  | 0.65917900  |
| H | 3.19655900  | 0.42816300  | 1.92721700  |
| H | 3.81209500  | -1.13796300 | 1.39757400  |
| C | 3.03449500  | -0.67817000 | -1.34172100 |
| H | 3.64740000  | 0.12408200  | -1.74416200 |
| H | 3.67150000  | -1.55018700 | -1.20252700 |
| H | 2.28089500  | -0.91606700 | -2.09194600 |
| C | 1.88569000  | -2.75117100 | 0.34498300  |
| H | 1.16896700  | -3.43984700 | 0.79440200  |
| H | 2.02234300  | -3.04454200 | -0.69458800 |
| H | 2.83193100  | -2.88639400 | 0.86619600  |
| C | 0.95488000  | -1.09309000 | 1.93648000  |
| H | 0.10080500  | -1.72657900 | 2.18336700  |
| H | 1.76394300  | -1.36363000 | 2.61183600  |
| H | 0.67845400  | -0.05847600 | 2.13902200  |

**4b-Z<sub>out</sub>**

|   |             |             |             |
|---|-------------|-------------|-------------|
| C | -2.72609200 | 0.96034900  | 0.38363900  |
| C | -1.96606000 | -0.14234500 | -0.09897300 |
| C | -2.71424700 | -1.41789100 | -0.45351800 |
| C | -0.57862700 | -0.12771200 | -0.18310100 |
| C | 0.22567800  | 1.04573000  | -0.18538800 |
| C | 0.16785700  | -1.40513800 | -0.38015400 |
| C | 1.60069400  | 1.03921200  | -0.22160400 |
| C | 1.49553800  | -1.40114200 | 0.39258200  |
| C | 2.40779400  | -0.23831100 | -0.11094800 |
| H | -0.25095700 | 2.00915300  | -0.28055900 |
| H | -2.70214500 | -2.12372700 | 0.38622800  |
| H | -2.20471900 | -1.91970600 | -1.27425900 |
| C | -2.19675500 | 2.13851000  | 1.13948100  |
| H | -1.29488600 | 1.88628900  | 1.68775600  |
| H | -1.97327500 | 2.96432400  | 0.46321400  |
| H | -2.95074800 | 2.48551500  | 1.84525000  |
| C | 2.19805700  | 2.35527200  | -0.40665800 |
| H | 1.49059500  | 3.17455300  | -0.32577100 |
| C | 3.46514300  | 2.69491100  | -0.71143000 |
| H | 4.25984800  | 1.98300400  | -0.85645300 |
| H | 3.71384200  | 3.73821500  | -0.84340200 |
| C | -4.13470600 | -1.15578000 | -0.85003800 |
| H | -4.68009300 | -1.90405700 | -1.40542900 |
| C | -4.75337700 | -0.03242800 | -0.48984900 |
| N | -4.04382500 | 0.94051600  | 0.24011500  |
| H | -4.57068500 | 1.70036800  | 0.64913800  |
| H | -5.78011100 | 0.21034300  | -0.70972300 |
| C | 1.18171900  | -1.25195900 | 1.88696000  |
| H | 0.40565900  | -1.96476300 | 2.17161300  |
| H | 2.05798900  | -1.46779700 | 2.49475200  |
| H | 0.83436200  | -0.25072300 | 2.14298000  |
| C | 2.13374000  | -2.77416500 | 0.17623900  |
| H | 2.22142500  | -3.02250700 | -0.88002400 |
| H | 3.12225400  | -2.84057700 | 0.62780400  |
| H | 1.51158300  | -3.53665000 | 0.64654400  |
| C | 3.57831900  | -0.05077000 | 0.87127500  |
| H | 4.39123400  | 0.51359900  | 0.42751700  |
| H | 3.26923100  | 0.46583600  | 1.77783900  |
| H | 3.98238900  | -1.02159800 | 1.15239500  |
| C | 2.97354100  | -0.55923900 | -1.50896300 |
| H | 3.69499900  | -1.37199200 | -1.44217400 |
| H | 2.19153500  | -0.84805600 | -2.21076000 |
| H | 3.48022400  | 0.30575500  | -1.92852900 |
| H | 0.35545000  | -1.55044900 | -1.45021500 |
| H | -0.41751800 | -2.26059100 | -0.04386200 |

**4c- $E_{out}$** 

|    |             |             |             |
|----|-------------|-------------|-------------|
| C  | 3.31133300  | -0.64562800 | -0.57909100 |
| C  | 2.40434600  | 0.40094000  | -0.22693900 |
| C  | 2.98835000  | 1.73022000  | 0.22798700  |
| C  | 1.02540200  | 0.26935800  | -0.31288300 |
| C  | 0.20927400  | 1.43035500  | -0.18463600 |
| C  | 0.29126800  | -1.02391200 | -0.50982600 |
| C  | -1.16408900 | 1.44174100  | -0.15384000 |
| C  | -0.98861200 | -1.02314000 | 0.31834400  |
| H  | 0.00828600  | -1.16568700 | -1.55607900 |
| H  | 0.86431500  | -1.88196300 | -0.18012600 |
| C  | -1.92276200 | 0.13533400  | -0.11861700 |
| H  | 0.68222800  | 2.40232800  | -0.19697100 |
| H  | 2.36492600  | 2.13704300  | 1.02412700  |
| H  | 2.96336400  | 2.46596200  | -0.58547500 |
| C  | 2.98823800  | -1.87867900 | -1.36408200 |
| H  | 2.68207800  | -2.69083300 | -0.70466800 |
| H  | 2.19864400  | -1.69967900 | -2.08511100 |
| H  | 3.87427900  | -2.20879800 | -1.90443800 |
| N  | 4.58654300  | -0.51775000 | -0.25428200 |
| C  | -1.82617200 | 2.72495000  | -0.23246500 |
| H  | -1.16898300 | 3.57601800  | -0.09557900 |
| C  | -3.11698800 | 2.96278900  | -0.53327500 |
| H  | -3.82924300 | 2.17622700  | -0.72214000 |
| H  | -3.46319600 | 3.98322000  | -0.61278900 |
| C  | 5.13460700  | 0.54107000  | 0.49349900  |
| H  | 6.15476500  | 0.40368900  | 0.81198700  |
| C  | 4.38967800  | 1.61792200  | 0.73667400  |
| H  | 4.81567000  | 2.43992200  | 1.29251800  |
| H  | 5.21614700  | -1.25094800 | -0.55475500 |
| Cl | -3.32330300 | 0.18990700  | 0.95933800  |
| Cl | -2.46493600 | -0.16472300 | -1.80199100 |
| Cl | -1.78512000 | -2.58780700 | 0.13450800  |
| Cl | -0.53324700 | -0.79985700 | 2.03075600  |

**4c-Z<sub>in</sub>**

|    |             |             |             |
|----|-------------|-------------|-------------|
| C  | 4.51066100  | -1.23468100 | -0.97612100 |
| C  | 3.07255500  | -1.40098500 | -0.59538300 |
| C  | 2.42562700  | -0.09345900 | -0.17322100 |
| C  | 3.27169000  | 0.92151500  | 0.37311300  |
| H  | 4.99850600  | -2.00177700 | -1.55884000 |
| H  | 2.53103100  | -1.81904200 | -1.44248900 |
| H  | 3.00141000  | -2.14585100 | 0.20768900  |
| C  | 1.04764800  | 0.03495600  | -0.24135000 |
| C  | 0.33510300  | 1.26627800  | -0.16173100 |
| C  | 0.21935200  | -1.18535000 | -0.50948200 |
| C  | -1.03165200 | 1.38692600  | -0.18700000 |
| C  | -1.08756900 | -1.09323900 | 0.26517900  |
| H  | -0.01334500 | -1.27388700 | -1.57505100 |
| H  | 0.71939500  | -2.09637700 | -0.19117400 |
| C  | -1.89963200 | 0.14966300  | -0.18427600 |
| C  | 2.83069900  | 2.07357300  | 1.21892300  |
| H  | 2.65137500  | 2.95822500  | 0.60687100  |
| H  | 1.92243000  | 1.83604600  | 1.76437900  |
| H  | 3.61428100  | 2.32220100  | 1.93368400  |
| H  | 0.88190300  | 2.19525600  | -0.20418000 |
| N  | 4.57779700  | 0.80923700  | 0.20977700  |
| C  | -1.58316400 | 2.72052900  | -0.30677000 |
| H  | -0.86145000 | 3.51599200  | -0.15865500 |
| C  | -2.83930800 | 3.06402400  | -0.64624100 |
| H  | -3.61159400 | 2.33936500  | -0.84597200 |
| H  | -3.09425700 | 4.10930200  | -0.74515200 |
| C  | 5.21327000  | -0.17817700 | -0.57004700 |
| H  | 6.25663500  | -0.00497000 | -0.77625700 |
| H  | 5.16496500  | 1.49872400  | 0.66221300  |
| Cl | -3.32276800 | 0.32148200  | 0.85186300  |
| Cl | -2.41358000 | -0.09099100 | -1.88593500 |
| Cl | -0.67379700 | -0.92734600 | 1.99894800  |
| Cl | -2.00853400 | -2.57886800 | 0.03635500  |

**4c- $E_{in}$** 

|    |             |             |             |
|----|-------------|-------------|-------------|
| C  | -3.31133100 | -0.64562500 | -0.57909500 |
| C  | -2.40434400 | 0.40094400  | -0.22694700 |
| C  | -2.98834600 | 1.73022400  | 0.22798300  |
| C  | -1.02540000 | 0.26936100  | -0.31289300 |
| C  | -0.20927100 | 1.43035700  | -0.18464600 |
| C  | -0.29126800 | -1.02391000 | -0.50983400 |
| C  | 1.16409300  | 1.44174000  | -0.15384400 |
| C  | 0.98860800  | -1.02314000 | 0.31834300  |
| H  | -0.86431700 | -1.88196100 | -0.18013700 |
| H  | -0.00828000 | -1.16568400 | -1.55608500 |
| C  | 1.92276300  | 0.13533200  | -0.11861500 |
| H  | -0.68222300 | 2.40233000  | -0.19698500 |
| H  | -2.96336500 | 2.46596700  | -0.58547700 |
| H  | -2.36491800 | 2.13704500  | 1.02412200  |
| C  | -2.98823800 | -1.87867400 | -1.36409000 |
| H  | -2.19864300 | -1.69967300 | -2.08511800 |
| H  | -2.68208100 | -2.69083100 | -0.70467800 |
| H  | -3.87428000 | -2.20878900 | -1.90444800 |
| N  | -4.58654000 | -0.51775000 | -0.25427700 |
| C  | 1.82617800  | 2.72494800  | -0.23246800 |
| H  | 1.16899000  | 3.57601800  | -0.09558800 |
| C  | 3.11699600  | 2.96278500  | -0.53327200 |
| H  | 3.82925000  | 2.17622100  | -0.72213100 |
| H  | 3.46320500  | 3.98321400  | -0.61278700 |
| C  | -5.13460100 | 0.54106900  | 0.49350700  |
| H  | -6.15475600 | 0.40368700  | 0.81200100  |
| C  | -4.38967200 | 1.61792300  | 0.73667700  |
| H  | -4.81566400 | 2.43992300  | 1.29252200  |
| H  | -5.21614400 | -1.25094900 | -0.55474600 |
| Cl | 3.32329800  | 0.18990400  | 0.95934600  |
| Cl | 2.46494400  | -0.16472900 | -1.80198600 |
| Cl | 1.78511300  | -2.58780800 | 0.13451400  |
| Cl | 0.53323300  | -0.79985400 | 2.03075200  |



**4c-Z<sub>out</sub>**

|    |             |             |             |
|----|-------------|-------------|-------------|
| C  | -3.27169000 | 0.92151500  | 0.37311300  |
| C  | -2.42562700 | -0.09345900 | -0.17322100 |
| C  | -3.07255500 | -1.40098500 | -0.59538300 |
| C  | -1.04764800 | 0.03495600  | -0.24135000 |
| C  | -0.33510300 | 1.26627800  | -0.16173100 |
| C  | -0.21935200 | -1.18535000 | -0.50948200 |
| C  | 1.03165200  | 1.38692600  | -0.18700000 |
| C  | 1.08756900  | -1.09323900 | 0.26517900  |
| H  | -0.71939500 | -2.09637700 | -0.19117400 |
| H  | 0.01334500  | -1.27388700 | -1.57505100 |
| C  | 1.89963200  | 0.14966300  | -0.18427600 |
| H  | -0.88190300 | 2.19525600  | -0.20418000 |
| H  | -3.00141000 | -2.14585100 | 0.20768900  |
| H  | -2.53103100 | -1.81904200 | -1.44248900 |
| C  | -2.83069900 | 2.07357300  | 1.21892300  |
| H  | -1.92243000 | 1.83604600  | 1.76437900  |
| H  | -2.65137500 | 2.95822500  | 0.60687100  |
| H  | -3.61428000 | 2.32220100  | 1.93368400  |
| C  | 1.58316400  | 2.72052900  | -0.30677000 |
| H  | 0.86145000  | 3.51599200  | -0.15865500 |
| C  | 2.83930800  | 3.06402400  | -0.64624100 |
| H  | 3.61159400  | 2.33936500  | -0.84597200 |
| H  | 3.09425700  | 4.10930200  | -0.74515200 |
| C  | -4.51066100 | -1.23468100 | -0.97612100 |
| H  | -4.99850600 | -2.00177700 | -1.55884000 |
| C  | -5.21327000 | -0.17817700 | -0.57004700 |
| N  | -4.57779700 | 0.80923700  | 0.20977700  |
| H  | -5.16496500 | 1.49872400  | 0.66221300  |
| H  | -6.25663500 | -0.00497000 | -0.77625700 |
| Cl | 3.32276800  | 0.32148200  | 0.85186300  |
| Cl | 2.41358000  | -0.09099100 | -1.88593500 |
| Cl | 0.67379700  | -0.92734600 | 1.99894800  |
| Cl | 2.00853400  | -2.57886800 | 0.03635500  |

**4d- $E_{out}$** 

|    |             |             |             |
|----|-------------|-------------|-------------|
| C  | -3.89207600 | -0.48986800 | 0.81590800  |
| C  | -3.05074100 | 0.53971000  | 0.29637400  |
| C  | -3.71033500 | 1.75653700  | -0.33553300 |
| C  | -1.66481700 | 0.49394900  | 0.36801800  |
| C  | -0.91766200 | 1.66474000  | 0.05775800  |
| C  | -0.85636700 | -0.71619000 | 0.72903700  |
| C  | 0.45452200  | 1.74906300  | 0.00501600  |
| C  | 0.41436900  | -0.75794700 | -0.11339300 |
| H  | -0.55626600 | -0.69139400 | 1.78101900  |
| H  | -1.38697800 | -1.64045000 | 0.53678100  |
| C  | 1.28167000  | 0.49653300  | 0.13313200  |
| H  | -1.44464800 | 2.60100900  | -0.06215600 |
| H  | -3.12814000 | 2.06164600  | -1.20546300 |
| H  | -3.69701900 | 2.60937600  | 0.35450700  |
| C  | -3.48538900 | -1.58497600 | 1.75200400  |
| H  | -3.14646300 | -2.46215300 | 1.20063000  |
| H  | -2.69312300 | -1.26749900 | 2.42066700  |
| H  | -4.34092200 | -1.88468500 | 2.35559300  |
| N  | -5.18026000 | -0.47238000 | 0.51551300  |
| C  | 1.02575300  | 3.07460800  | -0.10837600 |
| H  | 0.31042900  | 3.84500400  | -0.37275000 |
| C  | 2.29043700  | 3.45170100  | 0.15706600  |
| H  | 3.05558500  | 2.75913500  | 0.46749500  |
| H  | 2.55927500  | 4.49554300  | 0.08056300  |
| C  | -5.80101400 | 0.44418200  | -0.35288500 |
| H  | -6.82177200 | 0.21728900  | -0.61297500 |
| C  | -5.11845700 | 1.50839100  | -0.77165300 |
| H  | -5.60146900 | 2.22233700  | -1.42211700 |
| H  | -5.76236100 | -1.18706300 | 0.93296600  |
| Br | 1.89483000  | 0.49289400  | 1.99329900  |
| Br | 2.80736700  | 0.47521300  | -1.04622800 |
| Br | 1.35685300  | -2.38407200 | 0.29540700  |
| Br | -0.14201200 | -0.81700700 | -1.98128300 |

**4d-Z<sub>in</sub>**

|    |             |             |             |
|----|-------------|-------------|-------------|
| C  | -5.07241100 | -1.06952400 | 1.32838700  |
| C  | -3.62972600 | -1.21351800 | 0.95577500  |
| C  | -3.06373000 | 0.04450200  | 0.32171700  |
| C  | -3.96930600 | 0.91268800  | -0.36116200 |
| H  | -5.51142900 | -1.76082100 | 2.03219100  |
| H  | -3.05782600 | -1.46075400 | 1.84895000  |
| H  | -3.52057800 | -2.07079100 | 0.27869800  |
| C  | -1.69341600 | 0.25199200  | 0.33396600  |
| C  | -1.05084200 | 1.49029600  | 0.05290500  |
| C  | -0.79474400 | -0.86933400 | 0.75771900  |
| C  | 0.30938800  | 1.68374700  | 0.02217100  |
| C  | 0.48696200  | -0.82492100 | -0.06363200 |
| H  | -0.53297100 | -0.77963500 | 1.81757700  |
| H  | -1.25571100 | -1.84083700 | 0.60079200  |
| C  | 1.23795000  | 0.50587300  | 0.16543500  |
| C  | -3.59836200 | 1.93866100  | -1.38414800 |
| H  | -3.46068800 | 2.91687400  | -0.92203700 |
| H  | -2.68318600 | 1.66379800  | -1.90042100 |
| H  | -4.40029600 | 2.03102100  | -2.11569000 |
| H  | -1.64639600 | 2.38645700  | -0.02616700 |
| N  | -5.26654300 | 0.75537700  | -0.16246800 |
| C  | 0.77249400  | 3.05453300  | -0.06990800 |
| H  | -0.00338300 | 3.76688100  | -0.32739200 |
| C  | 2.00127400  | 3.53346400  | 0.19597800  |
| H  | 2.82349700  | 2.90491000  | 0.49614300  |
| H  | 2.18138900  | 4.59678300  | 0.12822700  |
| C  | -5.83773100 | -0.13148500 | 0.77208100  |
| H  | -6.88797600 | 0.01266600  | 0.96548200  |
| H  | -5.89523200 | 1.33133500  | -0.70792800 |
| Br | 2.76422300  | 0.60460400  | -1.01006600 |
| Br | 1.84171400  | 0.57373300  | 2.02755500  |
| Br | -0.04893000 | -0.95988500 | -1.93873300 |
| Br | 1.56098700  | -2.35637700 | 0.37282100  |

**4d- $E_{in}$** 

|    |             |             |             |
|----|-------------|-------------|-------------|
| C  | 3.89197700  | -0.48992800 | 0.81587900  |
| C  | 3.05073600  | 0.53962700  | 0.29620200  |
| C  | 3.71039800  | 1.75637800  | -0.33582000 |
| C  | 1.66482200  | 0.49396100  | 0.36794600  |
| C  | 0.91766000  | 1.66473000  | 0.05757600  |
| C  | 0.85632800  | -0.71610500 | 0.72907800  |
| C  | -0.45450100 | 1.74910100  | 0.00501200  |
| C  | -0.41432100 | -0.75788300 | -0.11348100 |
| H  | 1.38693500  | -1.64042100 | 0.53710900  |
| H  | 0.55606800  | -0.69113800 | 1.78101800  |
| C  | -1.28166500 | 0.49659100  | 0.13329600  |
| H  | 1.44467700  | 2.60095000  | -0.06259900 |
| H  | 3.69685100  | 2.60936600  | 0.35405000  |
| H  | 3.12835900  | 2.06132600  | -1.20591400 |
| C  | 3.48498800  | -1.58515800 | 1.75169200  |
| H  | 2.69287300  | -1.26754400 | 2.42049500  |
| H  | 3.14564100  | -2.46205800 | 1.20014300  |
| H  | 4.34043200  | -1.88541600 | 2.35512900  |
| N  | 5.18026800  | -0.47234700 | 0.51589400  |
| C  | -1.02578100 | 3.07464700  | -0.10838800 |
| H  | -0.31053500 | 3.84502400  | -0.37303500 |
| C  | -2.29040100 | 3.45168500  | 0.15734400  |
| H  | -3.05544000 | 2.75906900  | 0.46793700  |
| H  | -2.55935800 | 4.49549400  | 0.08082600  |
| C  | 5.80120200  | 0.44424800  | -0.35234000 |
| H  | 6.82209100  | 0.21748000  | -0.61203000 |
| C  | 5.11866700  | 1.50830700  | -0.77148100 |
| H  | 5.60181400  | 2.22222700  | -1.42187300 |
| H  | 5.76226000  | -1.18708500 | 0.93338500  |
| Br | -1.35685500 | -2.38411000 | 0.29511700  |
| Br | 0.14206700  | -0.81684100 | -1.98130600 |
| Br | -2.80742200 | 0.47535600  | -1.04609000 |
| Br | -1.89479600 | 0.49268000  | 1.99339300  |

**4d-Z<sub>out</sub>**

|    |             |             |             |
|----|-------------|-------------|-------------|
| C  | 3.96897600  | 0.91331200  | -0.36048500 |
| C  | 3.06367100  | 0.04497900  | 0.32257300  |
| C  | 3.62977500  | -1.21312800 | 0.95644500  |
| C  | 1.69334300  | 0.25240800  | 0.33492100  |
| C  | 1.05065600  | 1.49061900  | 0.05377200  |
| C  | 0.79466000  | -0.86893200 | 0.75865200  |
| C  | -0.30960500 | 1.68384900  | 0.02269600  |
| C  | -0.48669000 | -0.82491000 | -0.06338400 |
| H  | 1.25579200  | -1.84045800 | 0.60237100  |
| H  | 0.53229100  | -0.77881300 | 1.81831000  |
| C  | -1.23813600 | 0.50584300  | 0.16548100  |
| H  | 1.64603300  | 2.38690200  | -0.02528200 |
| H  | 3.51962100  | -2.07058000 | 0.27975900  |
| H  | 3.05857000  | -1.45989100 | 1.85021800  |
| C  | 3.59738100  | 1.93979200  | -1.38272800 |
| H  | 2.68215400  | 1.66482600  | -1.89888100 |
| H  | 3.45933900  | 2.91763800  | -0.91997100 |
| H  | 4.39907200  | 2.03302600  | -2.11441700 |
| C  | -0.77294500 | 3.05457600  | -0.06932100 |
| H  | 0.00274900  | 3.76718100  | -0.32660400 |
| C  | -2.00190700 | 3.53312900  | 0.19648000  |
| H  | -2.82390800 | 2.90417400  | 0.49640600  |
| H  | -2.18227800 | 4.59640800  | 0.12893000  |
| C  | 5.07286200  | -1.06974400 | 1.32759500  |
| H  | 5.51246100  | -1.76150000 | 2.03059500  |
| C  | 5.83799400  | -0.13173900 | 0.77098200  |
| N  | 5.26631500  | 0.75575700  | -0.16265900 |
| H  | 5.89476100  | 1.33192800  | -0.70816800 |
| H  | 6.88847500  | 0.01188200  | 0.96346800  |
| Br | -2.76349100 | 0.60443400  | -1.01123200 |
| Br | -1.84315300 | 0.57334400  | 2.02712600  |
| Br | -1.56073300 | -2.35650400 | 0.37256800  |
| Br | 0.04996200  | -0.95994100 | -1.93818200 |
